# Supplementary material for: Effect of the lignin type on the gas/UV barrier properties of lignin–polyethyleneimine based composite films
Source: Royal Society of Chemistry journal article supplement (doi:10.1039/d5ra07628e), 2026-01-01
Supplement: d5ra07628e2.xlsx [file d5ra07628e2.xlsx]

## Sheet: Sheet1
ﾚﾎﾟｰﾄ:	16:17:05, 07/04/2025
ｻﾝﾌﾟﾙ:	20250704_SESC_0.05mg・mL-1
ﾌｧｲﾙ名:	20250704_SESC_0.05mg・mL-1_20250704154856.UDS
分析日時:	15:46:36, 07/04/2025
ｵﾍﾟﾚｰﾀ:	owner
ｺﾒﾝﾄ:
光度計
ﾓﾃﾞﾙ:	U-2900形分光光度計
ｼﾘｱﾙ No.:
ROM Ver.:	2J15301 05
装置条件
測定ﾓｰﾄﾞ:	波長ｽｷｬﾝ
ﾃﾞｰﾀﾓｰﾄﾞ:	Abs
開始波長:	400.0 nm
終了波長:	200.0 nm
ｽｷｬﾝｽﾋﾟｰﾄﾞ:	100 nm/min
ｻﾝﾌﾟﾘﾝｸﾞ間隔:	0.2 nm
初期待ち時間:	0 s
繰り返し周期:	0.0 min
測定回数:	1
測定前ｵｰﾄｾﾞﾛ:	Off
ｽﾘｯﾄ:	1.50 nm
光源切換ﾓｰﾄﾞ:	自動切換
光源切換波長:	340.0 nm
ﾍﾞｰｽﾗｲﾝ設定:	ﾕｰｻﾞ 1
ﾚｽﾎﾟﾝｽ:	標準
D2ﾗﾝﾌﾟ:	On
WIﾗﾝﾌﾟ:	On
ｾﾙ長補正:	On
ｾﾙ長:	10.0 mm
ﾃﾞｰﾀ処理項目
Savitsky-Golay Smoothed
ｽﾑｰｼﾞﾝｸﾞ次数:	2
ﾃﾞｰﾀ点数:	7
回数:	1
ﾋﾟｰｸ検出
検出方法:	Rectangular
感度:	1
しきい値:	0.01
ﾋﾟｰｸ
ﾋﾟｰｸ No.	開始 (nm)	ﾋﾟｰｸ (nm)	終了 (nm)	高さ (Abs)	ﾊﾞﾚｰ (nm)	ﾊﾞﾚｰ (Abs)
1	400	280.4	266.2	0.896	266.2	0.829
2	266.2	205.4	204.6	3.73	204.6	3.682
3	204.6	203.8	200	3.734	200	3.676
ﾃﾞｰﾀﾘｽﾄ
nm	Abs
400	0.146
399.8	0.146
399.6	0.146
399.4	0.147
399.2	0.147
399	0.147
398.8	0.148
398.6	0.148
398.4	0.148
398.2	0.149
398	0.149
397.8	0.149
397.6	0.15
397.4	0.15
397.2	0.151
397	0.151
396.8	0.151
396.6	0.152
396.4	0.152
396.2	0.152
396	0.153
395.8	0.153
395.6	0.154
395.4	0.154
395.2	0.154
395	0.155
394.8	0.155
394.6	0.156
394.4	0.156
394.2	0.157
394	0.157
393.8	0.157
393.6	0.158
393.4	0.158
393.2	0.159
393	0.159
392.8	0.159
392.6	0.16
392.4	0.16
392.2	0.161
392	0.161
391.8	0.162
391.6	0.162
391.4	0.163
391.2	0.163
391	0.164
390.8	0.164
390.6	0.164
390.4	0.165
390.2	0.165
390	0.166
389.8	0.166
389.6	0.167
389.4	0.167
389.2	0.168
389	0.168
388.8	0.169
388.6	0.169
388.4	0.17
388.2	0.17
388	0.171
387.8	0.171
387.6	0.172
387.4	0.173
387.2	0.173
387	0.174
386.8	0.174
386.6	0.175
386.4	0.175
386.2	0.176
386	0.176
385.8	0.177
385.6	0.178
385.4	0.178
385.2	0.179
385	0.179
384.8	0.18
384.6	0.18
384.4	0.181
384.2	0.182
384	0.182
383.8	0.183
383.6	0.183
383.4	0.184
383.2	0.185
383	0.185
382.8	0.186
382.6	0.186
382.4	0.187
382.2	0.188
382	0.188
381.8	0.189
381.6	0.189
381.4	0.19
381.2	0.191
381	0.191
380.8	0.192
380.6	0.193
380.4	0.193
380.2	0.194
380	0.194
379.8	0.193
379.6	0.193
379.4	0.193
379.2	0.193
379	0.193
378.8	0.194
378.6	0.195
378.4	0.196
378.2	0.196
378	0.197
377.8	0.198
377.6	0.198
377.4	0.199
377.2	0.199
377	0.2
376.8	0.201
376.6	0.202
376.4	0.202
376.2	0.203
376	0.204
375.8	0.204
375.6	0.205
375.4	0.206
375.2	0.206
375	0.207
374.8	0.208
374.6	0.209
374.4	0.209
374.2	0.21
374	0.211
373.8	0.212
373.6	0.212
373.4	0.213
373.2	0.214
373	0.215
372.8	0.215
372.6	0.216
372.4	0.217
372.2	0.218
372	0.218
371.8	0.219
371.6	0.22
371.4	0.221
371.2	0.221
371	0.222
370.8	0.223
370.6	0.224
370.4	0.225
370.2	0.225
370	0.226
369.8	0.227
369.6	0.228
369.4	0.228
369.2	0.229
369	0.23
368.8	0.23
368.6	0.231
368.4	0.232
368.2	0.233
368	0.233
367.8	0.234
367.6	0.235
367.4	0.236
367.2	0.236
367	0.237
366.8	0.238
366.6	0.239
366.4	0.239
366.2	0.24
366	0.241
365.8	0.242
365.6	0.243
365.4	0.243
365.2	0.244
365	0.245
364.8	0.245
364.6	0.246
364.4	0.247
364.2	0.247
364	0.248
363.8	0.249
363.6	0.25
363.4	0.251
363.2	0.251
363	0.252
362.8	0.253
362.6	0.254
362.4	0.254
362.2	0.255
362	0.256
361.8	0.256
361.6	0.257
361.4	0.258
361.2	0.259
361	0.259
360.8	0.26
360.6	0.261
360.4	0.262
360.2	0.262
360	0.263
359.8	0.264
359.6	0.265
359.4	0.265
359.2	0.266
359	0.267
358.8	0.268
358.6	0.268
358.4	0.269
358.2	0.27
358	0.27
357.8	0.271
357.6	0.272
357.4	0.273
357.2	0.274
357	0.274
356.8	0.275
356.6	0.276
356.4	0.276
356.2	0.277
356	0.278
355.8	0.278
355.6	0.279
355.4	0.28
355.2	0.28
355	0.281
354.8	0.282
354.6	0.282
354.4	0.283
354.2	0.284
354	0.284
353.8	0.285
353.6	0.286
353.4	0.287
353.2	0.287
353	0.288
352.8	0.289
352.6	0.289
352.4	0.29
352.2	0.291
352	0.291
351.8	0.292
351.6	0.292
351.4	0.293
351.2	0.294
351	0.294
350.8	0.295
350.6	0.296
350.4	0.296
350.2	0.297
350	0.298
349.8	0.298
349.6	0.299
349.4	0.299
349.2	0.3
349	0.301
348.8	0.301
348.6	0.302
348.4	0.302
348.2	0.303
348	0.304
347.8	0.304
347.6	0.305
347.4	0.305
347.2	0.306
347	0.306
346.8	0.307
346.6	0.308
346.4	0.308
346.2	0.309
346	0.309
345.8	0.31
345.6	0.311
345.4	0.311
345.2	0.312
345	0.312
344.8	0.313
344.6	0.313
344.4	0.314
344.2	0.315
344	0.315
343.8	0.316
343.6	0.316
343.4	0.317
343.2	0.318
343	0.318
342.8	0.319
342.6	0.319
342.4	0.32
342.2	0.32
342	0.321
341.8	0.322
341.6	0.322
341.4	0.323
341.2	0.323
341	0.324
340.8	0.324
340.6	0.325
340.4	0.325
340.2	0.326
340	0.327
339.8	0.328
339.6	0.33
339.4	0.331
339.2	0.332
339	0.332
338.8	0.333
338.6	0.333
338.4	0.334
338.2	0.334
338	0.335
337.8	0.335
337.6	0.336
337.4	0.336
337.2	0.337
337	0.337
336.8	0.338
336.6	0.338
336.4	0.339
336.2	0.339
336	0.34
335.8	0.341
335.6	0.341
335.4	0.342
335.2	0.342
335	0.343
334.8	0.343
334.6	0.344
334.4	0.344
334.2	0.345
334	0.345
333.8	0.346
333.6	0.346
333.4	0.347
333.2	0.347
333	0.348
332.8	0.349
332.6	0.349
332.4	0.35
332.2	0.35
332	0.351
331.8	0.352
331.6	0.352
331.4	0.353
331.2	0.353
331	0.354
330.8	0.355
330.6	0.355
330.4	0.356
330.2	0.356
330	0.357
329.8	0.358
329.6	0.358
329.4	0.359
329.2	0.359
329	0.36
328.8	0.361
328.6	0.362
328.4	0.362
328.2	0.363
328	0.364
327.8	0.364
327.6	0.365
327.4	0.366
327.2	0.367
327	0.367
326.8	0.368
326.6	0.369
326.4	0.37
326.2	0.371
326	0.371
325.8	0.372
325.6	0.373
325.4	0.374
325.2	0.374
325	0.375
324.8	0.376
324.6	0.377
324.4	0.378
324.2	0.379
324	0.379
323.8	0.38
323.6	0.381
323.4	0.382
323.2	0.383
323	0.384
322.8	0.385
322.6	0.386
322.4	0.387
322.2	0.388
322	0.389
321.8	0.39
321.6	0.391
321.4	0.392
321.2	0.392
321	0.393
320.8	0.394
320.6	0.395
320.4	0.396
320.2	0.397
320	0.398
319.8	0.4
319.6	0.401
319.4	0.402
319.2	0.403
319	0.404
318.8	0.405
318.6	0.406
318.4	0.407
318.2	0.408
318	0.409
317.8	0.41
317.6	0.411
317.4	0.412
317.2	0.414
317	0.415
316.8	0.416
316.6	0.417
316.4	0.418
316.2	0.419
316	0.42
315.8	0.421
315.6	0.422
315.4	0.423
315.2	0.424
315	0.425
314.8	0.426
314.6	0.427
314.4	0.429
314.2	0.43
314	0.431
313.8	0.432
313.6	0.433
313.4	0.434
313.2	0.435
313	0.437
312.8	0.438
312.6	0.439
312.4	0.44
312.2	0.441
312	0.442
311.8	0.444
311.6	0.445
311.4	0.446
311.2	0.447
311	0.448
310.8	0.45
310.6	0.451
310.4	0.452
310.2	0.454
310	0.455
309.8	0.456
309.6	0.457
309.4	0.459
309.2	0.46
309	0.461
308.8	0.463
308.6	0.464
308.4	0.465
308.2	0.467
308	0.468
307.8	0.47
307.6	0.471
307.4	0.472
307.2	0.474
307	0.475
306.8	0.477
306.6	0.478
306.4	0.48
306.2	0.481
306	0.483
305.8	0.484
305.6	0.486
305.4	0.488
305.2	0.489
305	0.491
304.8	0.492
304.6	0.494
304.4	0.496
304.2	0.497
304	0.499
303.8	0.501
303.6	0.503
303.4	0.505
303.2	0.506
303	0.508
302.8	0.51
302.6	0.512
302.4	0.514
302.2	0.516
302	0.518
301.8	0.52
301.6	0.522
301.4	0.524
301.2	0.526
301	0.528
300.8	0.53
300.6	0.532
300.4	0.534
300.2	0.537
300	0.539
299.8	0.541
299.6	0.544
299.4	0.547
299.2	0.549
299	0.552
298.8	0.555
298.6	0.557
298.4	0.56
298.2	0.563
298	0.566
297.8	0.569
297.6	0.572
297.4	0.575
297.2	0.579
297	0.582
296.8	0.585
296.6	0.589
296.4	0.592
296.2	0.596
296	0.6
295.8	0.604
295.6	0.608
295.4	0.612
295.2	0.616
295	0.621
294.8	0.625
294.6	0.63
294.4	0.634
294.2	0.639
294	0.644
293.8	0.649
293.6	0.655
293.4	0.66
293.2	0.665
293	0.671
292.8	0.676
292.6	0.682
292.4	0.688
292.2	0.694
292	0.7
291.8	0.706
291.6	0.712
291.4	0.718
291.2	0.724
291	0.73
290.8	0.737
290.6	0.743
290.4	0.749
290.2	0.755
290	0.761
289.8	0.767
289.6	0.773
289.4	0.779
289.2	0.784
289	0.79
288.8	0.795
288.6	0.8
288.4	0.805
288.2	0.81
288	0.815
287.8	0.819
287.6	0.824
287.4	0.828
287.2	0.832
287	0.836
286.8	0.84
286.6	0.843
286.4	0.846
286.2	0.85
286	0.853
285.8	0.856
285.6	0.858
285.4	0.861
285.2	0.864
285	0.866
284.8	0.869
284.6	0.871
284.4	0.873
284.2	0.875
284	0.877
283.8	0.879
283.6	0.881
283.4	0.883
283.2	0.885
283	0.886
282.8	0.887
282.6	0.889
282.4	0.89
282.2	0.891
282	0.892
281.8	0.893
281.6	0.894
281.4	0.894
281.2	0.895
281	0.895
280.8	0.896
280.6	0.896
280.4	0.896
280.2	0.896
280	0.896
279.8	0.896
279.6	0.896
279.4	0.895
279.2	0.895
279	0.895
278.8	0.895
278.6	0.894
278.4	0.894
278.2	0.893
278	0.893
277.8	0.892
277.6	0.891
277.4	0.89
277.2	0.889
277	0.888
276.8	0.887
276.6	0.886
276.4	0.885
276.2	0.884
276	0.882
275.8	0.881
275.6	0.88
275.4	0.879
275.2	0.877
275	0.875
274.8	0.874
274.6	0.872
274.4	0.871
274.2	0.869
274	0.868
273.8	0.866
273.6	0.865
273.4	0.863
273.2	0.862
273	0.86
272.8	0.859
272.6	0.857
272.4	0.856
272.2	0.854
272	0.853
271.8	0.851
271.6	0.85
271.4	0.849
271.2	0.847
271	0.846
270.8	0.844
270.6	0.843
270.4	0.842
270.2	0.841
270	0.84
269.8	0.839
269.6	0.838
269.4	0.837
269.2	0.836
269	0.835
268.8	0.834
268.6	0.834
268.4	0.833
268.2	0.832
268	0.832
267.8	0.831
267.6	0.831
267.4	0.83
267.2	0.83
267	0.83
266.8	0.83
266.6	0.829
266.4	0.829
266.2	0.829
266	0.829
265.8	0.829
265.6	0.83
265.4	0.83
265.2	0.83
265	0.831
264.8	0.831
264.6	0.831
264.4	0.832
264.2	0.833
264	0.833
263.8	0.834
263.6	0.835
263.4	0.836
263.2	0.837
263	0.838
262.8	0.839
262.6	0.84
262.4	0.841
262.2	0.842
262	0.844
261.8	0.845
261.6	0.847
261.4	0.848
261.2	0.85
261	0.852
260.8	0.853
260.6	0.855
260.4	0.857
260.2	0.859
260	0.861
259.8	0.863
259.6	0.865
259.4	0.868
259.2	0.87
259	0.873
258.8	0.875
258.6	0.878
258.4	0.881
258.2	0.884
258	0.887
257.8	0.89
257.6	0.893
257.4	0.896
257.2	0.9
257	0.904
256.8	0.907
256.6	0.911
256.4	0.915
256.2	0.919
256	0.923
255.8	0.928
255.6	0.932
255.4	0.937
255.2	0.942
255	0.947
254.8	0.952
254.6	0.958
254.4	0.963
254.2	0.969
254	0.975
253.8	0.981
253.6	0.988
253.4	0.994
253.2	1.001
253	1.008
252.8	1.015
252.6	1.022
252.4	1.03
252.2	1.038
252	1.046
251.8	1.054
251.6	1.063
251.4	1.071
251.2	1.08
251	1.09
250.8	1.099
250.6	1.109
250.4	1.118
250.2	1.129
250	1.139
249.8	1.149
249.6	1.16
249.4	1.171
249.2	1.183
249	1.194
248.8	1.206
248.6	1.218
248.4	1.23
248.2	1.243
248	1.255
247.8	1.268
247.6	1.281
247.4	1.294
247.2	1.307
247	1.321
246.8	1.335
246.6	1.349
246.4	1.363
246.2	1.377
246	1.391
245.8	1.405
245.6	1.419
245.4	1.434
245.2	1.448
245	1.462
244.8	1.477
244.6	1.492
244.4	1.506
244.2	1.52
244	1.534
243.8	1.549
243.6	1.563
243.4	1.577
243.2	1.591
243	1.605
242.8	1.619
242.6	1.632
242.4	1.646
242.2	1.659
242	1.673
241.8	1.686
241.6	1.699
241.4	1.711
241.2	1.724
241	1.737
240.8	1.749
240.6	1.761
240.4	1.773
240.2	1.785
240	1.797
239.8	1.808
239.6	1.82
239.4	1.831
239.2	1.841
239	1.852
238.8	1.863
238.6	1.874
238.4	1.885
238.2	1.895
238	1.905
237.8	1.915
237.6	1.925
237.4	1.934
237.2	1.944
237	1.953
236.8	1.962
236.6	1.971
236.4	1.979
236.2	1.988
236	1.996
235.8	2.005
235.6	2.013
235.4	2.022
235.2	2.03
235	2.037
234.8	2.044
234.6	2.051
234.4	2.058
234.2	2.065
234	2.072
233.8	2.079
233.6	2.086
233.4	2.093
233.2	2.1
233	2.107
232.8	2.113
232.6	2.119
232.4	2.125
232.2	2.13
232	2.135
231.8	2.141
231.6	2.146
231.4	2.152
231.2	2.157
231	2.162
230.8	2.168
230.6	2.172
230.4	2.177
230.2	2.18
230	2.185
229.8	2.19
229.6	2.195
229.4	2.2
229.2	2.204
229	2.208
228.8	2.212
228.6	2.216
228.4	2.22
228.2	2.224
228	2.229
227.8	2.233
227.6	2.238
227.4	2.242
227.2	2.246
227	2.251
226.8	2.255
226.6	2.26
226.4	2.264
226.2	2.268
226	2.272
225.8	2.277
225.6	2.282
225.4	2.286
225.2	2.291
225	2.296
224.8	2.302
224.6	2.307
224.4	2.312
224.2	2.318
224	2.324
223.8	2.33
223.6	2.336
223.4	2.342
223.2	2.349
223	2.356
222.8	2.363
222.6	2.371
222.4	2.378
222.2	2.386
222	2.394
221.8	2.402
221.6	2.411
221.4	2.42
221.2	2.429
221	2.439
220.8	2.449
220.6	2.459
220.4	2.47
220.2	2.48
220	2.492
219.8	2.504
219.6	2.516
219.4	2.529
219.2	2.541
219	2.554
218.8	2.568
218.6	2.583
218.4	2.598
218.2	2.614
218	2.629
217.8	2.645
217.6	2.662
217.4	2.679
217.2	2.696
217	2.713
216.8	2.732
216.6	2.751
216.4	2.77
216.2	2.789
216	2.809
215.8	2.83
215.6	2.851
215.4	2.872
215.2	2.891
215	2.911
214.8	2.931
214.6	2.954
214.4	2.978
214.2	3.002
214	3.026
213.8	3.048
213.6	3.071
213.4	3.092
213.2	3.113
213	3.136
212.8	3.159
212.6	3.184
212.4	3.211
212.2	3.236
212	3.257
211.8	3.275
211.6	3.289
211.4	3.306
211.2	3.329
211	3.355
210.8	3.379
210.6	3.399
210.4	3.412
210.2	3.424
210	3.438
209.8	3.456
209.6	3.476
209.4	3.493
209.2	3.507
209	3.523
208.8	3.541
208.6	3.56
208.4	3.579
208.2	3.591
208	3.596
207.8	3.605
207.6	3.614
207.4	3.62
207.2	3.627
207	3.638
206.8	3.645
206.6	3.647
206.4	3.649
206.2	3.655
206	3.673
205.8	3.698
205.6	3.72
205.4	3.73
205.2	3.725
205	3.712
204.8	3.696
204.6	3.682
204.4	3.683
204.2	3.698
204	3.72
203.8	3.734
203.6	3.73
203.4	3.717
203.2	3.707
203	3.71
202.8	3.723
202.6	3.73
202.4	3.724
202.2	3.707
202	3.689
201.8	3.685
201.6	3.686
201.4	3.688
201.2	3.696
201	3.699
200.8	3.697
200.6	3.696
200.4	3.692
200.2	3.685
200	3.676
