# Supplementary material for: Effect of the lignin type on the gas/UV barrier properties of lignin–polyethyleneimine based composite films
Source: Royal Society of Chemistry journal article supplement (doi:10.1039/d5ra07628e), 2026-01-01
Supplement: d5ra07628e3.xlsx [file d5ra07628e3.xlsx]

## Sheet: Sheet1
ﾚﾎﾟｰﾄ:	13:57:28, 07/10/2025
ｻﾝﾌﾟﾙ:	20250707_Soda_0.05mg・mL-1
ﾌｧｲﾙ名:	20250707_Soda_0.05mg・mL-1.UDS
分析日時:	10:07:35, 07/07/2025
ｵﾍﾟﾚｰﾀ:	owner
ｺﾒﾝﾄ:
光度計
ﾓﾃﾞﾙ:	U-2900形分光光度計
ｼﾘｱﾙ No.:
ROM Ver.:	2J15301 05
装置条件
測定ﾓｰﾄﾞ:	波長ｽｷｬﾝ
ﾃﾞｰﾀﾓｰﾄﾞ:	Abs
開始波長:	400.0 nm
終了波長:	200.0 nm
ｽｷｬﾝｽﾋﾟｰﾄﾞ:	100 nm/min
ｻﾝﾌﾟﾘﾝｸﾞ間隔:	0.2 nm
初期待ち時間:	0 s
繰り返し周期:	0.0 min
測定回数:	1
測定前ｵｰﾄｾﾞﾛ:	Off
ｽﾘｯﾄ:	1.50 nm
光源切換ﾓｰﾄﾞ:	自動切換
光源切換波長:	340.0 nm
ﾍﾞｰｽﾗｲﾝ設定:	ﾕｰｻﾞ 1
ﾚｽﾎﾟﾝｽ:	標準
D2ﾗﾝﾌﾟ:	On
WIﾗﾝﾌﾟ:	On
ｾﾙ長補正:	On
ｾﾙ長:	10.0 mm
ﾋﾟｰｸ検出
検出方法:	Rectangular
感度:	1
しきい値:	0.01
ﾋﾟｰｸ
ﾋﾟｰｸ No.	開始 (nm)	ﾋﾟｰｸ (nm)	終了 (nm)	高さ (Abs)	ﾊﾞﾚｰ (nm)	ﾊﾞﾚｰ (Abs)
1	400	273	264.6	0.767	264.6	0.757
2	264.6	204	200	3.584	200	3.455
ﾃﾞｰﾀﾘｽﾄ
nm	Abs
400	0.177
399.8	0.177
399.6	0.177
399.4	0.177
399.2	0.178
399	0.178
398.8	0.178
398.6	0.179
398.4	0.179
398.2	0.179
398	0.18
397.8	0.18
397.6	0.18
397.4	0.18
397.2	0.181
397	0.181
396.8	0.182
396.6	0.182
396.4	0.182
396.2	0.182
396	0.183
395.8	0.183
395.6	0.183
395.4	0.184
395.2	0.184
395	0.185
394.8	0.185
394.6	0.185
394.4	0.186
394.2	0.186
394	0.186
393.8	0.187
393.6	0.187
393.4	0.187
393.2	0.188
393	0.188
392.8	0.188
392.6	0.189
392.4	0.189
392.2	0.189
392	0.19
391.8	0.19
391.6	0.19
391.4	0.191
391.2	0.191
391	0.191
390.8	0.192
390.6	0.192
390.4	0.193
390.2	0.193
390	0.193
389.8	0.194
389.6	0.194
389.4	0.194
389.2	0.195
389	0.195
388.8	0.195
388.6	0.196
388.4	0.196
388.2	0.197
388	0.197
387.8	0.197
387.6	0.198
387.4	0.198
387.2	0.198
387	0.199
386.8	0.199
386.6	0.2
386.4	0.2
386.2	0.2
386	0.201
385.8	0.201
385.6	0.202
385.4	0.202
385.2	0.202
385	0.203
384.8	0.203
384.6	0.204
384.4	0.204
384.2	0.205
384	0.205
383.8	0.205
383.6	0.206
383.4	0.206
383.2	0.206
383	0.207
382.8	0.207
382.6	0.208
382.4	0.208
382.2	0.209
382	0.209
381.8	0.209
381.6	0.21
381.4	0.21
381.2	0.211
381	0.211
380.8	0.212
380.6	0.212
380.4	0.212
380.2	0.213
380	0.213
379.8	0.213
379.6	0.212
379.4	0.212
379.2	0.213
379	0.212
378.8	0.212
378.6	0.213
378.4	0.214
378.2	0.215
378	0.215
377.8	0.216
377.6	0.216
377.4	0.217
377.2	0.217
377	0.218
376.8	0.218
376.6	0.219
376.4	0.219
376.2	0.219
376	0.22
375.8	0.22
375.6	0.221
375.4	0.221
375.2	0.222
375	0.222
374.8	0.223
374.6	0.223
374.4	0.224
374.2	0.224
374	0.225
373.8	0.226
373.6	0.226
373.4	0.227
373.2	0.227
373	0.227
372.8	0.228
372.6	0.229
372.4	0.229
372.2	0.23
372	0.23
371.8	0.231
371.6	0.231
371.4	0.232
371.2	0.232
371	0.233
370.8	0.234
370.6	0.234
370.4	0.235
370.2	0.235
370	0.236
369.8	0.236
369.6	0.237
369.4	0.238
369.2	0.238
369	0.239
368.8	0.239
368.6	0.24
368.4	0.24
368.2	0.241
368	0.242
367.8	0.242
367.6	0.243
367.4	0.243
367.2	0.244
367	0.245
366.8	0.245
366.6	0.246
366.4	0.246
366.2	0.247
366	0.248
365.8	0.248
365.6	0.249
365.4	0.249
365.2	0.25
365	0.251
364.8	0.251
364.6	0.252
364.4	0.253
364.2	0.253
364	0.254
363.8	0.254
363.6	0.255
363.4	0.256
363.2	0.256
363	0.257
362.8	0.258
362.6	0.258
362.4	0.259
362.2	0.26
362	0.26
361.8	0.261
361.6	0.261
361.4	0.262
361.2	0.263
361	0.264
360.8	0.264
360.6	0.265
360.4	0.266
360.2	0.266
360	0.267
359.8	0.267
359.6	0.268
359.4	0.269
359.2	0.269
359	0.27
358.8	0.271
358.6	0.271
358.4	0.272
358.2	0.273
358	0.273
357.8	0.274
357.6	0.275
357.4	0.276
357.2	0.276
357	0.277
356.8	0.278
356.6	0.278
356.4	0.279
356.2	0.28
356	0.28
355.8	0.281
355.6	0.282
355.4	0.282
355.2	0.283
355	0.284
354.8	0.285
354.6	0.285
354.4	0.286
354.2	0.287
354	0.287
353.8	0.288
353.6	0.289
353.4	0.29
353.2	0.29
353	0.291
352.8	0.292
352.6	0.293
352.4	0.293
352.2	0.294
352	0.295
351.8	0.296
351.6	0.296
351.4	0.297
351.2	0.298
351	0.299
350.8	0.3
350.6	0.3
350.4	0.301
350.2	0.302
350	0.302
349.8	0.303
349.6	0.304
349.4	0.305
349.2	0.306
349	0.307
348.8	0.308
348.6	0.308
348.4	0.309
348.2	0.31
348	0.311
347.8	0.312
347.6	0.312
347.4	0.313
347.2	0.314
347	0.315
346.8	0.316
346.6	0.317
346.4	0.317
346.2	0.318
346	0.319
345.8	0.32
345.6	0.321
345.4	0.322
345.2	0.323
345	0.324
344.8	0.324
344.6	0.325
344.4	0.326
344.2	0.327
344	0.328
343.8	0.329
343.6	0.33
343.4	0.331
343.2	0.332
343	0.333
342.8	0.333
342.6	0.334
342.4	0.335
342.2	0.336
342	0.337
341.8	0.338
341.6	0.339
341.4	0.34
341.2	0.341
341	0.342
340.8	0.342
340.6	0.343
340.4	0.344
340.2	0.345
340	0.346
339.8	0.348
339.6	0.35
339.4	0.351
339.2	0.352
339	0.352
338.8	0.353
338.6	0.354
338.4	0.355
338.2	0.356
338	0.357
337.8	0.358
337.6	0.359
337.4	0.361
337.2	0.362
337	0.363
336.8	0.364
336.6	0.365
336.4	0.366
336.2	0.367
336	0.368
335.8	0.368
335.6	0.369
335.4	0.371
335.2	0.371
335	0.373
334.8	0.374
334.6	0.375
334.4	0.376
334.2	0.377
334	0.378
333.8	0.379
333.6	0.38
333.4	0.381
333.2	0.382
333	0.383
332.8	0.384
332.6	0.385
332.4	0.386
332.2	0.387
332	0.389
331.8	0.39
331.6	0.39
331.4	0.391
331.2	0.393
331	0.394
330.8	0.395
330.6	0.396
330.4	0.397
330.2	0.398
330	0.399
329.8	0.4
329.6	0.401
329.4	0.402
329.2	0.403
329	0.405
328.8	0.405
328.6	0.406
328.4	0.408
328.2	0.409
328	0.41
327.8	0.411
327.6	0.412
327.4	0.413
327.2	0.414
327	0.415
326.8	0.417
326.6	0.418
326.4	0.419
326.2	0.42
326	0.421
325.8	0.422
325.6	0.423
325.4	0.424
325.2	0.425
325	0.426
324.8	0.427
324.6	0.429
324.4	0.43
324.2	0.431
324	0.432
323.8	0.433
323.6	0.434
323.4	0.435
323.2	0.437
323	0.438
322.8	0.439
322.6	0.44
322.4	0.441
322.2	0.442
322	0.443
321.8	0.444
321.6	0.445
321.4	0.446
321.2	0.448
321	0.449
320.8	0.45
320.6	0.451
320.4	0.452
320.2	0.453
320	0.454
319.8	0.455
319.6	0.456
319.4	0.458
319.2	0.459
319	0.46
318.8	0.461
318.6	0.462
318.4	0.463
318.2	0.464
318	0.465
317.8	0.467
317.6	0.468
317.4	0.469
317.2	0.47
317	0.471
316.8	0.472
316.6	0.473
316.4	0.474
316.2	0.476
316	0.477
315.8	0.478
315.6	0.479
315.4	0.48
315.2	0.481
315	0.483
314.8	0.484
314.6	0.485
314.4	0.486
314.2	0.487
314	0.489
313.8	0.49
313.6	0.491
313.4	0.492
313.2	0.493
313	0.494
312.8	0.495
312.6	0.497
312.4	0.498
312.2	0.499
312	0.5
311.8	0.502
311.6	0.503
311.4	0.504
311.2	0.505
311	0.507
310.8	0.508
310.6	0.509
310.4	0.51
310.2	0.511
310	0.513
309.8	0.514
309.6	0.515
309.4	0.516
309.2	0.517
309	0.519
308.8	0.52
308.6	0.521
308.4	0.523
308.2	0.524
308	0.525
307.8	0.526
307.6	0.528
307.4	0.529
307.2	0.53
307	0.532
306.8	0.533
306.6	0.534
306.4	0.535
306.2	0.537
306	0.538
305.8	0.539
305.6	0.541
305.4	0.542
305.2	0.543
305	0.545
304.8	0.546
304.6	0.547
304.4	0.549
304.2	0.55
304	0.551
303.8	0.552
303.6	0.554
303.4	0.555
303.2	0.556
303	0.558
302.8	0.559
302.6	0.56
302.4	0.562
302.2	0.563
302	0.564
301.8	0.566
301.6	0.567
301.4	0.568
301.2	0.57
301	0.571
300.8	0.572
300.6	0.574
300.4	0.575
300.2	0.576
300	0.578
299.8	0.579
299.6	0.58
299.4	0.582
299.2	0.583
299	0.585
298.8	0.586
298.6	0.587
298.4	0.589
298.2	0.59
298	0.592
297.8	0.594
297.6	0.595
297.4	0.596
297.2	0.598
297	0.599
296.8	0.601
296.6	0.602
296.4	0.604
296.2	0.605
296	0.607
295.8	0.609
295.6	0.61
295.4	0.612
295.2	0.614
295	0.615
294.8	0.617
294.6	0.619
294.4	0.621
294.2	0.622
294	0.624
293.8	0.626
293.6	0.628
293.4	0.629
293.2	0.631
293	0.633
292.8	0.635
292.6	0.637
292.4	0.639
292.2	0.641
292	0.643
291.8	0.645
291.6	0.647
291.4	0.649
291.2	0.651
291	0.653
290.8	0.655
290.6	0.657
290.4	0.659
290.2	0.661
290	0.664
289.8	0.666
289.6	0.668
289.4	0.67
289.2	0.672
289	0.674
288.8	0.677
288.6	0.679
288.4	0.681
288.2	0.683
288	0.685
287.8	0.688
287.6	0.69
287.4	0.692
287.2	0.694
287	0.696
286.8	0.698
286.6	0.7
286.4	0.703
286.2	0.705
286	0.707
285.8	0.709
285.6	0.711
285.4	0.713
285.2	0.715
285	0.717
284.8	0.719
284.6	0.721
284.4	0.723
284.2	0.725
284	0.726
283.8	0.728
283.6	0.73
283.4	0.732
283.2	0.734
283	0.735
282.8	0.737
282.6	0.738
282.4	0.74
282.2	0.741
282	0.742
281.8	0.744
281.6	0.745
281.4	0.747
281.2	0.748
281	0.749
280.8	0.75
280.6	0.751
280.4	0.752
280.2	0.753
280	0.754
279.8	0.755
279.6	0.755
279.4	0.756
279.2	0.757
279	0.758
278.8	0.758
278.6	0.759
278.4	0.759
278.2	0.76
278	0.76
277.8	0.761
277.6	0.761
277.4	0.762
277.2	0.762
277	0.763
276.8	0.763
276.6	0.763
276.4	0.764
276.2	0.764
276	0.765
275.8	0.765
275.6	0.765
275.4	0.765
275.2	0.765
275	0.766
274.8	0.766
274.6	0.766
274.4	0.766
274.2	0.767
274	0.767
273.8	0.767
273.6	0.767
273.4	0.767
273.2	0.767
273	0.767
272.8	0.767
272.6	0.767
272.4	0.767
272.2	0.767
272	0.767
271.8	0.767
271.6	0.767
271.4	0.767
271.2	0.767
271	0.767
270.8	0.766
270.6	0.766
270.4	0.766
270.2	0.765
270	0.765
269.8	0.764
269.6	0.764
269.4	0.764
269.2	0.764
269	0.763
268.8	0.763
268.6	0.762
268.4	0.762
268.2	0.762
268	0.761
267.8	0.761
267.6	0.761
267.4	0.76
267.2	0.76
267	0.76
266.8	0.759
266.6	0.759
266.4	0.759
266.2	0.759
266	0.758
265.8	0.758
265.6	0.758
265.4	0.758
265.2	0.758
265	0.758
264.8	0.757
264.6	0.757
264.4	0.757
264.2	0.757
264	0.757
263.8	0.757
263.6	0.758
263.4	0.758
263.2	0.758
263	0.758
262.8	0.758
262.6	0.759
262.4	0.759
262.2	0.759
262	0.759
261.8	0.76
261.6	0.76
261.4	0.761
261.2	0.761
261	0.762
260.8	0.763
260.6	0.763
260.4	0.764
260.2	0.764
260	0.765
259.8	0.766
259.6	0.767
259.4	0.768
259.2	0.769
259	0.77
258.8	0.772
258.6	0.772
258.4	0.772
258.2	0.775
258	0.777
257.8	0.779
257.6	0.781
257.4	0.782
257.2	0.784
257	0.786
256.8	0.788
256.6	0.79
256.4	0.792
256.2	0.794
256	0.796
255.8	0.799
255.6	0.801
255.4	0.804
255.2	0.807
255	0.809
254.8	0.813
254.6	0.816
254.4	0.818
254.2	0.822
254	0.825
253.8	0.828
253.6	0.832
253.4	0.836
253.2	0.839
253	0.843
252.8	0.847
252.6	0.851
252.4	0.856
252.2	0.86
252	0.864
251.8	0.869
251.6	0.874
251.4	0.878
251.2	0.883
251	0.888
250.8	0.894
250.6	0.899
250.4	0.904
250.2	0.909
250	0.915
249.8	0.92
249.6	0.926
249.4	0.932
249.2	0.938
249	0.944
248.8	0.95
248.6	0.956
248.4	0.963
248.2	0.969
248	0.975
247.8	0.982
247.6	0.988
247.4	0.995
247.2	1.002
247	1.009
246.8	1.016
246.6	1.023
246.4	1.03
246.2	1.037
246	1.044
245.8	1.051
245.6	1.059
245.4	1.066
245.2	1.073
245	1.08
244.8	1.087
244.6	1.095
244.4	1.103
244.2	1.11
244	1.117
243.8	1.125
243.6	1.132
243.4	1.14
243.2	1.147
243	1.155
242.8	1.162
242.6	1.17
242.4	1.177
242.2	1.185
242	1.192
241.8	1.199
241.6	1.207
241.4	1.214
241.2	1.222
241	1.229
240.8	1.237
240.6	1.244
240.4	1.251
240.2	1.259
240	1.266
239.8	1.274
239.6	1.281
239.4	1.288
239.2	1.295
239	1.303
238.8	1.311
238.6	1.319
238.4	1.326
238.2	1.333
238	1.34
237.8	1.348
237.6	1.355
237.4	1.363
237.2	1.37
237	1.377
236.8	1.384
236.6	1.391
236.4	1.398
236.2	1.405
236	1.412
235.8	1.419
235.6	1.426
235.4	1.433
235.2	1.44
235	1.447
234.8	1.454
234.6	1.461
234.4	1.469
234.2	1.476
234	1.483
233.8	1.49
233.6	1.497
233.4	1.504
233.2	1.511
233	1.518
232.8	1.525
232.6	1.532
232.4	1.539
232.2	1.546
232	1.553
231.8	1.561
231.6	1.568
231.4	1.575
231.2	1.582
231	1.589
230.8	1.596
230.6	1.604
230.4	1.611
230.2	1.618
230	1.625
229.8	1.632
229.6	1.64
229.4	1.647
229.2	1.654
229	1.662
228.8	1.669
228.6	1.677
228.4	1.685
228.2	1.692
228	1.7
227.8	1.708
227.6	1.716
227.4	1.724
227.2	1.732
227	1.74
226.8	1.748
226.6	1.756
226.4	1.765
226.2	1.774
226	1.783
225.8	1.792
225.6	1.801
225.4	1.81
225.2	1.82
225	1.829
224.8	1.839
224.6	1.849
224.4	1.859
224.2	1.869
224	1.88
223.8	1.891
223.6	1.901
223.4	1.913
223.2	1.924
223	1.936
222.8	1.948
222.6	1.96
222.4	1.972
222.2	1.986
222	1.999
221.8	2.012
221.6	2.025
221.4	2.039
221.2	2.053
221	2.068
220.8	2.082
220.6	2.097
220.4	2.113
220.2	2.128
220	2.144
219.8	2.16
219.6	2.176
219.4	2.193
219.2	2.211
219	2.229
218.8	2.247
218.6	2.265
218.4	2.284
218.2	2.303
218	2.323
217.8	2.343
217.6	2.363
217.4	2.383
217.2	2.404
217	2.425
216.8	2.446
216.6	2.466
216.4	2.489
216.2	2.511
216	2.533
215.8	2.555
215.6	2.578
215.4	2.6
215.2	2.623
215	2.646
214.8	2.67
214.6	2.694
214.4	2.718
214.2	2.741
214	2.765
213.8	2.789
213.6	2.815
213.4	2.84
213.2	2.865
213	2.891
212.8	2.917
212.6	2.939
212.4	2.962
212.2	2.989
212	3.013
211.8	3.034
211.6	3.055
211.4	3.078
211.2	3.107
211	3.134
210.8	3.152
210.6	3.171
210.4	3.191
210.2	3.212
210	3.239
209.8	3.26
209.6	3.279
209.4	3.298
209.2	3.321
209	3.341
208.8	3.358
208.6	3.376
208.4	3.391
208.2	3.404
208	3.419
207.8	3.435
207.6	3.446
207.4	3.459
207.2	3.483
207	3.502
206.8	3.509
206.6	3.513
206.4	3.516
206.2	3.53
206	3.542
205.8	3.542
205.6	3.549
205.4	3.559
205.2	3.56
205	3.564
204.8	3.577
204.6	3.581
204.4	3.575
204.2	3.577
204	3.584
203.8	3.583
203.6	3.583
203.4	3.583
203.2	3.57
203	3.562
202.8	3.566
202.6	3.571
202.4	3.574
202.2	3.567
202	3.558
201.8	3.556
201.6	3.55
201.4	3.54
201.2	3.536
201	3.533
200.8	3.52
200.6	3.497
200.4	3.481
200.2	3.469
200	3.455
