# Supplementary material for: Effect of the lignin type on the gas/UV barrier properties of lignin–polyethyleneimine based composite films
Source: Royal Society of Chemistry journal article supplement (doi:10.1039/d5ra07628e), 2026-01-01
Supplement: d5ra07628e31.pdf [file d5ra07628e31.pdf]

## Supporting Information

### Effect of the Lignin Type on the Gas/UV Barrier Properties of Lignin–Polyethyleneimine Based Composite Films

Asuka Yanagawa, Asami Suzuki, Anri Watanabe, Takashi Makino, Yuichiro Otsuka, and Kazuhiro Shikinaka\*

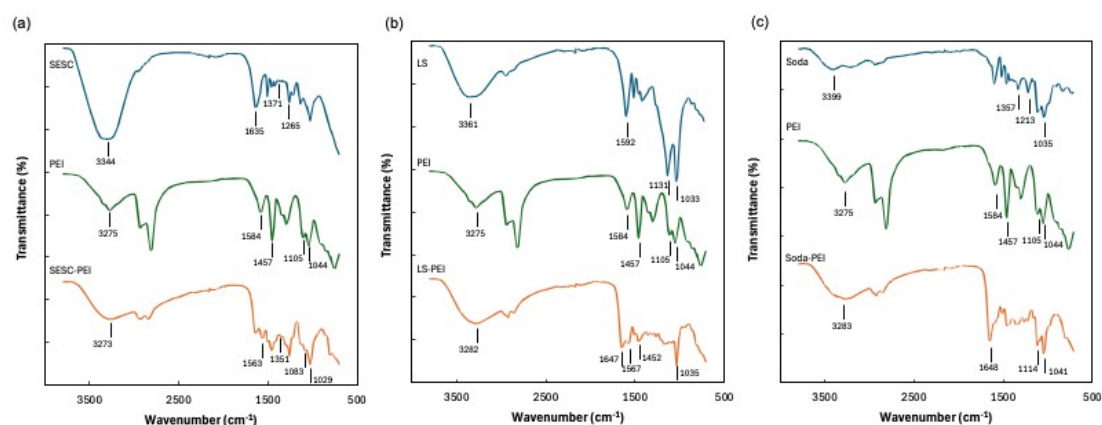

**Fig. S1** FTIR spectra of the lignin derivatives, PEI, and their composite materials, prepared at a lignin/PEI ratio of 50:50 using PEI with a  $M_w$  of 10000. (a) SESC, PEI, and SESC-PEI; (b) LS, PEI, and LS-PEI; (c) Soda, PEI, and Soda-PEI.

**Table S1.** Zeta potentials of the lignin derivatives, PEI ( $M_w = 10000$ ), and lignin-PEI dispersions

| SESC   | LS     | Soda   | PEI  | SESC/PEI |       |       | LS/PEI |       | Soda/PEI |
|--------|--------|--------|------|----------|-------|-------|--------|-------|----------|
|        |        |        |      | 17:83    | 50:50 | 75:25 | 50:50  | 50:50 |          |
| -26.50 | -33.90 | -33.29 | 0.75 | -0.27    | -2.69 | 0.41  | 1.54   | -0.83 |          |

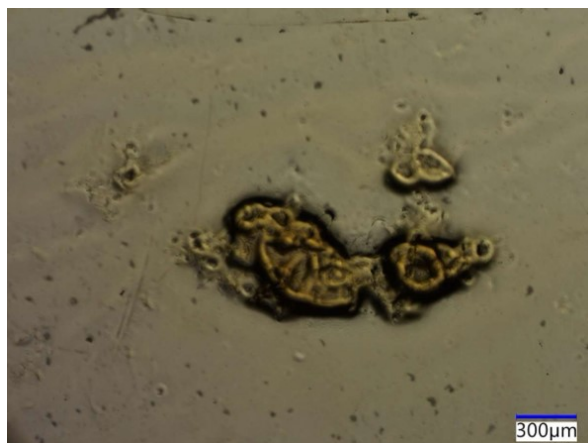

**Fig. S2** Digital microscopy image for the specimen prepared using a PEI  $M_w$  70000 and SESC. A lignin/PEI ratio of 50:50 was employed.

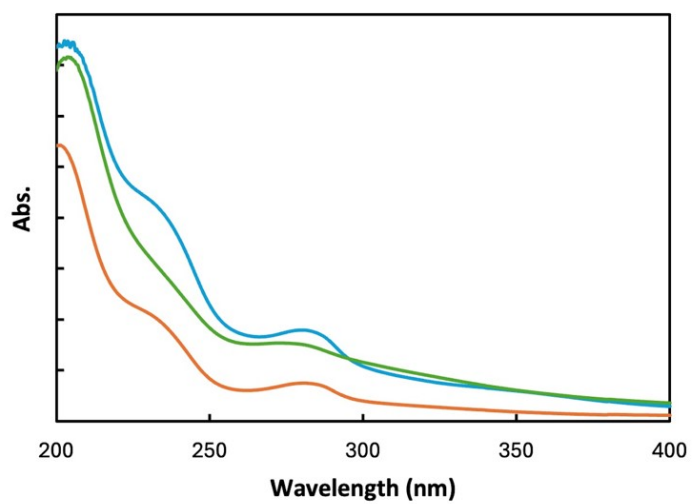

**Fig. S3** UV-Vis adsorption spectra recorded for the SESC (blue), LS (green), and Soda (orange) specimens in aqueous solution (0.05 mg/mL).

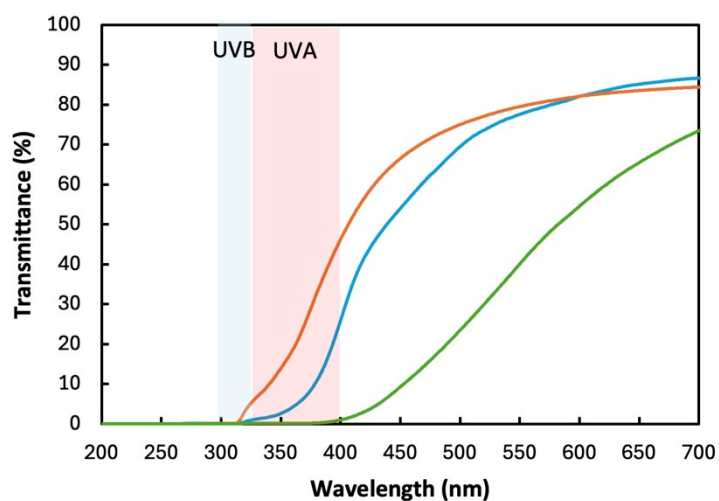

**Fig. S4** UV-Vis transmittance spectra of the best-performing lignin/PEI films: SESC/PEI ratio of 17/83 with a PEI  $M_w$  70000 (blue), LS/PEI ratio of 50/50 with a PEI  $M_w$  600 (orange), and Soda/PEI ratio of 50/50 with a PEI  $M_w$  70000 (green).

**Table S2.** UV transmittance results, CIELAB ( $L^*a^*b^*$ ) color spaces, and mandrel bend radii for the SESC/PEI, LS/PEI, and Soda/PEI specimens before and after weathering. Samples were prepared using a lignin/PEI ratio of 50:50 and a PEI  $M_w$  of 10000

|                          | Before weather resistance test |        |          | After weather resistance test |        |          |
|--------------------------|--------------------------------|--------|----------|-------------------------------|--------|----------|
|                          | SESC/PEI                       | LS/PEI | Soda/PEI | SESC/PEI                      | LS/PEI | Soda/PEI |
| UVA transmittance (%)    | 15                             | 29     | 0.10     | 6.1                           | 3.1    | 0.24     |
| UVB transmittance (%)    | 0.1                            | 0.03   | 0.17     | 0.10                          | 0.10   | 0.10     |
| $L^*$                    | 34.60                          | 36.15  | 31.67    | 35.07                         | 34.38  | 34.02    |
| $a^*$                    | 0.18                           | -0.25  | 3.71     | 0.31                          | 0.46   | 3.16     |
| $b^*$                    | 4.59                           | 5.49   | 4.91     | 6.39                          | 6.01   | 8.08     |
| Mandrel bend radius (mm) | <1                             | 2      | <1       | <1                            | 2      | <1       |
