# Supplementary material for: Effect of the lignin type on the gas/UV barrier properties of lignin–polyethyleneimine based composite films
Source: Royal Society of Chemistry journal article supplement (doi:10.1039/d5ra07628e), 2026-01-01
Supplement: d5ra07628e32.xlsx [file d5ra07628e32.xlsx]

## Sheet: Sheet1
ﾚﾎﾟｰﾄ:	16:45:34, 10/06/2025
ｻﾝﾌﾟﾙ:	20250410_PEI33SL67-100umPET
ﾌｧｲﾙ名:	20250410_PEI33SL67-100umPET.UDS
分析日時:	10:34:55, 04/10/2025
ｵﾍﾟﾚｰﾀ:	owner
ｺﾒﾝﾄ:
光度計
ﾓﾃﾞﾙ:	U-2900形分光光度計
ｼﾘｱﾙ No.:
ROM Ver.:	2J15301 05
装置条件
測定ﾓｰﾄﾞ:	波長ｽｷｬﾝ
ﾃﾞｰﾀﾓｰﾄﾞ:	%T
開始波長:	800.0 nm
終了波長:	200.0 nm
ｽｷｬﾝｽﾋﾟｰﾄﾞ:	100 nm/min
ｻﾝﾌﾟﾘﾝｸﾞ間隔:	1.0 nm
初期待ち時間:	0 s
繰り返し周期:	0.0 min
測定回数:	1
測定前ｵｰﾄｾﾞﾛ:	Off
ｽﾘｯﾄ:	1.50 nm
光源切換ﾓｰﾄﾞ:	自動切換
光源切換波長:	340.0 nm
ﾍﾞｰｽﾗｲﾝ設定:	ﾕｰｻﾞ 1
ﾚｽﾎﾟﾝｽ:	標準
D2ﾗﾝﾌﾟ:	On
WIﾗﾝﾌﾟ:	On
ｾﾙ長:	10.0 mm
ﾋﾟｰｸ検出
検出方法:	Rectangular
感度:	1
しきい値:	0.01
ﾋﾟｰｸ
ﾋﾟｰｸ No.	開始 (nm)	ﾋﾟｰｸ (nm)	終了 (nm)	高さ (%T)	ﾊﾞﾚｰ (nm)	ﾊﾞﾚｰ (%T)
1	800	746	738	87.3	738	87.5
ﾃﾞｰﾀﾘｽﾄ
nm	%T
800	88.5
799	88.5
798	88.4
797	88.4
796	88.4
795	88.3
794	88.3
793	88.3
792	88.3
791	88.2
790	88.2
789	88.2
788	88.2
787	88.1
786	88.1
785	88.1
784	88.1
783	88.1
782	88
781	88
780	88
779	88
778	87.9
777	87.9
776	87.9
775	87.9
774	87.9
773	87.8
772	87.8
771	87.8
770	87.8
769	87.7
768	87.7
767	87.7
766	87.7
765	87.6
764	87.6
763	87.6
762	87.6
761	87.6
760	87.5
759	87.5
758	87.5
757	87.5
756	87.5
755	87.5
754	87.4
753	87.4
752	87.4
751	87.4
750	87.4
749	87.4
748	87.4
747	87.3
746	87.3
745	87.4
744	87.4
743	87.4
742	87.4
741	87.4
740	87.5
739	87.5
738	87.5
737	87.5
736	87.5
735	87.5
734	87.5
733	87.5
732	87.4
731	87.4
730	87.4
729	87.4
728	87.4
727	87.4
726	87.4
725	87.4
724	87.3
723	87.3
722	87.3
721	87.3
720	87.3
719	87.3
718	87.3
717	87.3
716	87.2
715	87.2
714	87.2
713	87.2
712	87.2
711	87.2
710	87.1
709	87.1
708	87.1
707	87.1
706	87.1
705	87
704	87
703	87
702	87
701	86.9
700	86.9
699	86.9
698	86.9
697	86.8
696	86.8
695	86.8
694	86.8
693	86.7
692	86.7
691	86.7
690	86.6
689	86.6
688	86.6
687	86.5
686	86.5
685	86.5
684	86.4
683	86.4
682	86.4
681	86.4
680	86.3
679	86.3
678	86.2
677	86.2
676	86.2
675	86.1
674	86.1
673	86.1
672	86
671	86
670	86
669	85.9
668	85.9
667	85.9
666	85.8
665	85.8
664	85.7
663	85.7
662	85.7
661	85.6
660	85.6
659	85.6
658	85.5
657	85.5
656	85.5
655	85.4
654	85.4
653	85.4
652	85.3
651	85.3
650	85.3
649	85.2
648	85.2
647	85.1
646	85.1
645	85.1
644	85
643	85
642	85
641	84.9
640	84.9
639	84.8
638	84.8
637	84.7
636	84.7
635	84.6
634	84.6
633	84.6
632	84.5
631	84.5
630	84.4
629	84.4
628	84.3
627	84.3
626	84.2
625	84.1
624	84.1
623	84
622	84
621	83.9
620	83.8
619	83.8
618	83.7
617	83.6
616	83.6
615	83.5
614	83.4
613	83.4
612	83.3
611	83.2
610	83.1
609	83
608	82.9
607	82.9
606	82.8
605	82.7
604	82.6
603	82.5
602	82.5
601	82.4
600	82.3
599	82.1
598	82.1
597	82
596	81.9
595	81.8
594	81.7
593	81.6
592	81.5
591	81.5
590	81.4
589	81.3
588	81.3
587	81.2
586	81.2
585	81.1
584	81
583	81
582	80.9
581	80.9
580	80.8
579	80.8
578	80.7
577	80.6
576	80.5
575	80.5
574	80.4
573	80.3
572	80.2
571	80.1
570	80.1
569	80
568	79.9
567	79.8
566	79.8
565	79.7
564	79.6
563	79.5
562	79.4
561	79.3
560	79.3
559	79.2
558	79.1
557	79
556	78.9
555	78.8
554	78.7
553	78.6
552	78.5
551	78.4
550	78.3
549	78.2
548	78.1
547	78
546	77.9
545	77.7
544	77.6
543	77.5
542	77.4
541	77.3
540	77.2
539	77.1
538	77
537	76.9
536	76.8
535	76.7
534	76.6
533	76.5
532	76.3
531	76.2
530	76.1
529	76
528	75.9
527	75.8
526	75.7
525	75.6
524	75.4
523	75.3
522	75.2
521	75.1
520	74.9
519	74.8
518	74.7
517	74.5
516	74.4
515	74.2
514	74.1
513	73.9
512	73.7
511	73.6
510	73.4
509	73.3
508	73.1
507	72.9
506	72.7
505	72.6
504	72.4
503	72.2
502	72
501	71.8
500	71.6
499	71.4
498	71.3
497	71.1
496	70.9
495	70.6
494	70.4
493	70.2
492	70
491	69.8
490	69.6
489	69.3
488	69.1
487	68.9
486	68.7
485	68.4
484	68.2
483	68
482	67.7
481	67.5
480	67.2
479	67
478	66.7
477	66.5
476	66.2
475	66
474	65.7
473	65.5
472	65.2
471	64.9
470	64.6
469	64.4
468	64.1
467	63.8
466	63.5
465	63.3
464	63
463	62.7
462	62.4
461	62.1
460	61.8
459	61.5
458	61.2
457	60.9
456	60.6
455	60.3
454	60
453	59.7
452	59.3
451	59
450	58.7
449	58.4
448	58
447	57.7
446	57.4
445	57
444	56.7
443	56.4
442	56
441	55.7
440	55.4
439	55
438	54.7
437	54.3
436	53.9
435	53.6
434	53.2
433	52.8
432	52.4
431	52
430	51.6
429	51.2
428	50.8
427	50.3
426	49.9
425	49.5
424	49
423	48.5
422	48.1
421	47.6
420	47.1
419	46.6
418	46.1
417	45.5
416	45
415	44.4
414	43.8
413	43.2
412	42.6
411	42
410	41.3
409	40.6
408	39.9
407	39.2
406	38.4
405	37.7
404	36.9
403	36.1
402	35.3
401	34.5
400	33.6
399	32.8
398	31.9
397	31.1
396	30.2
395	29.3
394	28.4
393	27.5
392	26.7
391	25.8
390	24.9
389	24.1
388	23.2
387	22.4
386	21.6
385	20.8
384	20
383	19.2
382	18.5
381	17.8
380	17.1
379	16.4
378	15.6
377	14.9
376	14.2
375	13.6
374	13
373	12.4
372	11.9
371	11.3
370	10.8
369	10.3
368	9.7
367	9.3
366	8.8
365	8.3
364	7.9
363	7.5
362	7.1
361	6.7
360	6.3
359	5.9
358	5.6
357	5.2
356	4.9
355	4.6
354	4.3
353	4
352	3.7
351	3.4
350	3.2
349	2.9
348	2.7
347	2.5
346	2.3
345	2.1
344	2
343	1.8
342	1.7
341	1.6
340	1.4
339	1.3
338	1.2
337	1.1
336	1
335	1
334	0.9
333	0.8
332	0.8
331	0.7
330	0.7
329	0.6
328	0.6
327	0.5
326	0.5
325	0.4
324	0.4
323	0.4
322	0.3
321	0.3
320	0.2
319	0.2
318	0.2
317	0.1
316	0.1
315	0.1
314	0.1
313	0.1
312	0.1
311	0.1
310	0.1
309	0.1
308	0.1
307	0.1
306	0.1
305	0.1
304	0.1
303	0.1
302	0.1
301	0.1
300	0.1
299	0.1
298	0.1
297	0.1
296	0.1
295	0.1
294	0.1
293	0.1
292	0.1
291	0.1
290	0.1
289	0.1
288	0.1
287	0.1
286	0.1
285	0.1
284	0.1
283	0.1
282	0.1
281	0.1
280	0.1
279	0.1
278	0.1
277	0.1
276	0.1
275	0.1
274	0.1
273	0.1
272	0.1
271	0.1
270	0
269	0
268	0
267	0
266	0
265	0
264	0
263	0
262	0
261	0
260	0
259	0
258	0
257	0
256	0
255	0
254	0
253	0
252	0
251	0
250	0
249	0
248	0
247	0
246	0
245	0
244	0
243	0
242	0
241	0
240	0
239	0
238	0
237	0
236	0
235	0
234	0
233	0
232	0
231	0
230	0
229	0
228	0
227	0
226	0
225	0
224	0
223	0
222	0
221	0
220	0
219	0
218	0
217	0
216	0
215	0
214	0
213	0
212	0
211	0
210	0
209	0
208	0
207	0
206	0
205	0
204	0
203	0
202	0
201	0
200	0
