# Supplementary material for: Effect of the lignin type on the gas/UV barrier properties of lignin–polyethyleneimine based composite films
Source: Royal Society of Chemistry journal article supplement (doi:10.1039/d5ra07628e), 2026-01-01
Supplement: d5ra07628e33.xlsx [file d5ra07628e33.xlsx]

## Sheet: Sheet1
ﾚﾎﾟｰﾄ:	16:44:43, 10/06/2025
ｻﾝﾌﾟﾙ:	20250410_PEI67SL33-100umPET
ﾌｧｲﾙ名:	20250410_PEI67SL33-100umPET.UDS
分析日時:	10:16:28, 04/10/2025
ｵﾍﾟﾚｰﾀ:	owner
ｺﾒﾝﾄ:
光度計
ﾓﾃﾞﾙ:	U-2900形分光光度計
ｼﾘｱﾙ No.:
ROM Ver.:	2J15301 05
装置条件
測定ﾓｰﾄﾞ:	波長ｽｷｬﾝ
ﾃﾞｰﾀﾓｰﾄﾞ:	%T
開始波長:	800.0 nm
終了波長:	200.0 nm
ｽｷｬﾝｽﾋﾟｰﾄﾞ:	100 nm/min
ｻﾝﾌﾟﾘﾝｸﾞ間隔:	1.0 nm
初期待ち時間:	0 s
繰り返し周期:	0.0 min
測定回数:	1
測定前ｵｰﾄｾﾞﾛ:	Off
ｽﾘｯﾄ:	1.50 nm
光源切換ﾓｰﾄﾞ:	自動切換
光源切換波長:	340.0 nm
ﾍﾞｰｽﾗｲﾝ設定:	ﾕｰｻﾞ 1
ﾚｽﾎﾟﾝｽ:	標準
D2ﾗﾝﾌﾟ:	On
WIﾗﾝﾌﾟ:	On
ｾﾙ長:	10.0 mm
ﾋﾟｰｸ検出
検出方法:	Rectangular
感度:	1
しきい値:	0.01
ﾋﾟｰｸ
ﾋﾟｰｸ No.	開始 (nm)	ﾋﾟｰｸ (nm)	終了 (nm)	高さ (%T)	ﾊﾞﾚｰ (nm)	ﾊﾞﾚｰ (%T)
1	800	751	728	88.1	728	88.4
ﾃﾞｰﾀﾘｽﾄ
nm	%T
800	89.1
799	89.1
798	89.1
797	89
796	89
795	89
794	89
793	88.9
792	88.9
791	88.9
790	88.8
789	88.8
788	88.8
787	88.8
786	88.7
785	88.7
784	88.7
783	88.7
782	88.7
781	88.6
780	88.6
779	88.6
778	88.6
777	88.5
776	88.5
775	88.5
774	88.5
773	88.5
772	88.5
771	88.4
770	88.4
769	88.4
768	88.4
767	88.4
766	88.3
765	88.3
764	88.3
763	88.3
762	88.3
761	88.2
760	88.2
759	88.2
758	88.2
757	88.2
756	88.2
755	88.2
754	88.2
753	88.2
752	88.1
751	88.1
750	88.2
749	88.1
748	88.2
747	88.2
746	88.2
745	88.2
744	88.2
743	88.3
742	88.3
741	88.3
740	88.4
739	88.4
738	88.4
737	88.4
736	88.4
735	88.4
734	88.4
733	88.4
732	88.4
731	88.4
730	88.4
729	88.4
728	88.4
727	88.4
726	88.4
725	88.4
724	88.4
723	88.4
722	88.4
721	88.4
720	88.4
719	88.4
718	88.4
717	88.4
716	88.4
715	88.4
714	88.4
713	88.4
712	88.4
711	88.3
710	88.3
709	88.3
708	88.3
707	88.3
706	88.3
705	88.3
704	88.2
703	88.2
702	88.2
701	88.2
700	88.2
699	88.2
698	88.1
697	88.1
696	88.1
695	88.1
694	88.1
693	88
692	88
691	88
690	88
689	87.9
688	87.9
687	87.9
686	87.9
685	87.8
684	87.8
683	87.8
682	87.8
681	87.8
680	87.7
679	87.7
678	87.7
677	87.6
676	87.6
675	87.6
674	87.6
673	87.6
672	87.5
671	87.5
670	87.5
669	87.5
668	87.4
667	87.4
666	87.4
665	87.4
664	87.4
663	87.3
662	87.3
661	87.3
660	87.3
659	87.3
658	87.3
657	87.3
656	87.3
655	87.2
654	87.2
653	87.2
652	87.2
651	87.2
650	87.2
649	87.2
648	87.1
647	87.1
646	87.1
645	87.1
644	87.1
643	87.1
642	87.1
641	87
640	87
639	87
638	87
637	87
636	86.9
635	86.9
634	86.9
633	86.9
632	86.9
631	86.8
630	86.8
629	86.8
628	86.7
627	86.7
626	86.7
625	86.6
624	86.6
623	86.6
622	86.5
621	86.5
620	86.4
619	86.4
618	86.3
617	86.3
616	86.2
615	86.2
614	86.1
613	86.1
612	86
611	86
610	85.9
609	85.8
608	85.8
607	85.7
606	85.7
605	85.6
604	85.5
603	85.5
602	85.4
601	85.4
600	85.3
599	85.2
598	85.2
597	85.1
596	85
595	85
594	84.9
593	84.9
592	84.9
591	84.8
590	84.8
589	84.8
588	84.8
587	84.8
586	84.7
585	84.7
584	84.7
583	84.7
582	84.7
581	84.7
580	84.7
579	84.6
578	84.6
577	84.6
576	84.6
575	84.5
574	84.5
573	84.4
572	84.4
571	84.4
570	84.3
569	84.3
568	84.2
567	84.2
566	84.1
565	84.1
564	84.1
563	84
562	84
561	83.9
560	83.9
559	83.8
558	83.7
557	83.7
556	83.6
555	83.6
554	83.5
553	83.4
552	83.4
551	83.3
550	83.3
549	83.2
548	83.2
547	83.1
546	83
545	83
544	82.9
543	82.8
542	82.8
541	82.7
540	82.7
539	82.6
538	82.6
537	82.5
536	82.5
535	82.4
534	82.4
533	82.3
532	82.3
531	82.2
530	82.2
529	82.1
528	82.1
527	82
526	81.9
525	81.9
524	81.8
523	81.7
522	81.7
521	81.6
520	81.5
519	81.5
518	81.4
517	81.3
516	81.2
515	81.1
514	81.1
513	81
512	80.9
511	80.8
510	80.8
509	80.7
508	80.6
507	80.6
506	80.5
505	80.4
504	80.4
503	80.3
502	80.2
501	80.2
500	80.1
499	80.1
498	80
497	79.9
496	79.9
495	79.8
494	79.8
493	79.7
492	79.6
491	79.6
490	79.5
489	79.5
488	79.4
487	79.3
486	79.2
485	79.2
484	79.1
483	79
482	78.9
481	78.8
480	78.7
479	78.6
478	78.6
477	78.5
476	78.4
475	78.3
474	78.2
473	78.1
472	78
471	77.9
470	77.8
469	77.7
468	77.6
467	77.5
466	77.4
465	77.3
464	77.2
463	77.1
462	77
461	76.8
460	76.7
459	76.6
458	76.5
457	76.4
456	76.2
455	76.1
454	75.9
453	75.8
452	75.7
451	75.5
450	75.4
449	75.2
448	75
447	74.9
446	74.7
445	74.6
444	74.4
443	74.3
442	74.1
441	74
440	73.8
439	73.7
438	73.5
437	73.4
436	73.2
435	73
434	72.8
433	72.6
432	72.4
431	72.2
430	72
429	71.8
428	71.6
427	71.4
426	71.2
425	71
424	70.7
423	70.5
422	70.3
421	70
420	69.8
419	69.6
418	69.3
417	69.1
416	68.8
415	68.5
414	68.3
413	68
412	67.7
411	67.3
410	67
409	66.7
408	66.4
407	66
406	65.7
405	65.4
404	65
403	64.6
402	64.2
401	63.8
400	63.4
399	63
398	62.6
397	62.1
396	61.6
395	61.2
394	60.6
393	60.1
392	59.6
391	59
390	58.5
389	57.9
388	57.3
387	56.7
386	56.1
385	55.4
384	54.7
383	54
382	53.3
381	52.6
380	51.9
379	51.1
378	50.2
377	49.3
376	48.5
375	47.6
374	46.7
373	45.8
372	44.9
371	43.9
370	42.9
369	41.8
368	40.8
367	39.7
366	38.6
365	37.5
364	36.4
363	35.2
362	34.1
361	33
360	31.9
359	30.7
358	29.6
357	28.6
356	27.5
355	26.4
354	25.4
353	24.4
352	23.4
351	22.4
350	21.5
349	20.6
348	19.8
347	19
346	18.2
345	17.4
344	16.7
343	16.1
342	15.5
341	14.9
340	14.3
339	13.8
338	13.3
337	12.8
336	12.3
335	11.9
334	11.4
333	11
332	10.6
331	10.2
330	9.8
329	9.4
328	8.9
327	8.5
326	8
325	7.5
324	7
323	6.4
322	5.8
321	5.2
320	4.5
319	3.8
318	3
317	2.2
316	1.5
315	0.9
314	0.5
313	0.2
312	0.1
311	0.1
310	0.1
309	0.1
308	0.1
307	0.1
306	0.1
305	0.1
304	0.1
303	0.1
302	0.1
301	0.1
300	0.1
299	0.1
298	0.1
297	0.1
296	0.1
295	0.1
294	0.1
293	0.1
292	0.1
291	0.1
290	0.1
289	0.1
288	0.1
287	0.1
286	0.1
285	0.1
284	0.1
283	0.1
282	0.1
281	0.1
280	0.1
279	0.1
278	0.1
277	0.1
276	0.1
275	0.1
274	0.1
273	0.1
272	0
271	0
270	0
269	0
268	0
267	0
266	0
265	0
264	0
263	0
262	0
261	0
260	0
259	0
258	0
257	0
256	0
255	0
254	0
253	0
252	0
251	0
250	0
249	0
248	0
247	0
246	0
245	0
244	0
243	0
242	0
241	0
240	0
239	0
238	0
237	0
236	0
235	0
234	0
233	0
232	0
231	0
230	0
229	0
228	0
227	0
226	0
225	0
224	0
223	0
222	0
221	0
220	0
219	0
218	0
217	0
216	0
215	0
214	0
213	0
212	0
211	0
210	0
209	0
208	0
207	0
206	0
205	0
204	0
203	0
202	0
201	0
200	0
