# Supplementary material for: Effect of the lignin type on the gas/UV barrier properties of lignin–polyethyleneimine based composite films
Source: Royal Society of Chemistry journal article supplement (doi:10.1039/d5ra07628e), 2026-01-01
Supplement: d5ra07628e34.xlsx [file d5ra07628e34.xlsx]

## Sheet: Sheet1
ﾚﾎﾟｰﾄ:	16:44:25, 10/06/2025
ｻﾝﾌﾟﾙ:	20250410_PEI25SL75-100umPET
ﾌｧｲﾙ名:	20250311_PEI2benzylchlorideSL1-100umPET_20250410101530.UDS
分析日時:	10:08:56, 04/10/2025
ｵﾍﾟﾚｰﾀ:	owner
ｺﾒﾝﾄ:
光度計
ﾓﾃﾞﾙ:	U-2900形分光光度計
ｼﾘｱﾙ No.:
ROM Ver.:	2J15301 05
装置条件
測定ﾓｰﾄﾞ:	波長ｽｷｬﾝ
ﾃﾞｰﾀﾓｰﾄﾞ:	%T
開始波長:	800.0 nm
終了波長:	200.0 nm
ｽｷｬﾝｽﾋﾟｰﾄﾞ:	100 nm/min
ｻﾝﾌﾟﾘﾝｸﾞ間隔:	1.0 nm
初期待ち時間:	0 s
繰り返し周期:	0.0 min
測定回数:	1
測定前ｵｰﾄｾﾞﾛ:	Off
ｽﾘｯﾄ:	1.50 nm
光源切換ﾓｰﾄﾞ:	自動切換
光源切換波長:	340.0 nm
ﾍﾞｰｽﾗｲﾝ設定:	ﾕｰｻﾞ 1
ﾚｽﾎﾟﾝｽ:	標準
D2ﾗﾝﾌﾟ:	On
WIﾗﾝﾌﾟ:	On
ｾﾙ長:	10.0 mm
ﾋﾟｰｸ検出
検出方法:	Rectangular
感度:	1
しきい値:	0.01
ﾋﾟｰｸ
ﾋﾟｰｸ No.	開始 (nm)	ﾋﾟｰｸ (nm)	終了 (nm)	高さ (%T)	ﾊﾞﾚｰ (nm)	ﾊﾞﾚｰ (%T)
1	800	746	737	87.1	737	87.3
ﾃﾞｰﾀﾘｽﾄ
nm	%T
800	88.3
799	88.2
798	88.2
797	88.2
796	88.1
795	88.1
794	88.1
793	88.1
792	88.1
791	88
790	88
789	88
788	88
787	87.9
786	87.9
785	87.9
784	87.9
783	87.9
782	87.8
781	87.8
780	87.8
779	87.8
778	87.7
777	87.7
776	87.7
775	87.7
774	87.7
773	87.6
772	87.6
771	87.6
770	87.6
769	87.6
768	87.5
767	87.5
766	87.5
765	87.5
764	87.5
763	87.4
762	87.4
761	87.4
760	87.4
759	87.3
758	87.3
757	87.3
756	87.3
755	87.3
754	87.2
753	87.2
752	87.2
751	87.2
750	87.2
749	87.2
748	87.1
747	87.1
746	87.1
745	87.1
744	87.2
743	87.2
742	87.2
741	87.2
740	87.3
739	87.3
738	87.3
737	87.3
736	87.3
735	87.3
734	87.3
733	87.3
732	87.3
731	87.3
730	87.2
729	87.2
728	87.2
727	87.2
726	87.2
725	87.2
724	87.2
723	87.2
722	87.2
721	87.2
720	87.2
719	87.2
718	87.2
717	87.2
716	87.1
715	87.1
714	87.1
713	87.1
712	87.1
711	87.1
710	87.1
709	87
708	87
707	87
706	87
705	87
704	87
703	86.9
702	86.9
701	86.9
700	86.9
699	86.9
698	86.9
697	86.8
696	86.8
695	86.8
694	86.8
693	86.8
692	86.7
691	86.7
690	86.7
689	86.7
688	86.6
687	86.6
686	86.6
685	86.6
684	86.5
683	86.5
682	86.5
681	86.4
680	86.4
679	86.4
678	86.4
677	86.3
676	86.3
675	86.3
674	86.2
673	86.2
672	86.2
671	86.1
670	86.1
669	86.1
668	86.1
667	86
666	86
665	86
664	85.9
663	85.9
662	85.9
661	85.9
660	85.8
659	85.8
658	85.8
657	85.7
656	85.7
655	85.7
654	85.7
653	85.6
652	85.6
651	85.6
650	85.6
649	85.5
648	85.5
647	85.5
646	85.4
645	85.4
644	85.4
643	85.4
642	85.3
641	85.3
640	85.3
639	85.2
638	85.2
637	85.2
636	85.2
635	85.1
634	85.1
633	85.1
632	85
631	85
630	84.9
629	84.9
628	84.9
627	84.8
626	84.8
625	84.7
624	84.7
623	84.7
622	84.6
621	84.6
620	84.5
619	84.5
618	84.4
617	84.4
616	84.3
615	84.3
614	84.2
613	84.1
612	84.1
611	84
610	84
609	83.9
608	83.8
607	83.8
606	83.7
605	83.6
604	83.6
603	83.5
602	83.4
601	83.3
600	83.2
599	83.1
598	83
597	83
596	82.9
595	82.8
594	82.7
593	82.7
592	82.6
591	82.5
590	82.5
589	82.4
588	82.4
587	82.3
586	82.3
585	82.3
584	82.2
583	82.2
582	82.2
581	82.1
580	82.1
579	82
578	82
577	82
576	81.9
575	81.8
574	81.8
573	81.7
572	81.7
571	81.6
570	81.6
569	81.5
568	81.5
567	81.4
566	81.4
565	81.3
564	81.3
563	81.2
562	81.1
561	81.1
560	81
559	81
558	80.9
557	80.8
556	80.8
555	80.7
554	80.6
553	80.6
552	80.5
551	80.4
550	80.3
549	80.2
548	80.2
547	80.1
546	80
545	79.9
544	79.8
543	79.7
542	79.7
541	79.6
540	79.5
539	79.4
538	79.3
537	79.2
536	79.1
535	79
534	79
533	78.9
532	78.8
531	78.7
530	78.6
529	78.5
528	78.5
527	78.4
526	78.3
525	78.2
524	78.1
523	78
522	77.9
521	77.9
520	77.8
519	77.7
518	77.6
517	77.5
516	77.4
515	77.3
514	77.2
513	77.1
512	77
511	76.9
510	76.8
509	76.7
508	76.6
507	76.5
506	76.4
505	76.3
504	76.2
503	76.2
502	76.1
501	76
500	75.9
499	75.8
498	75.7
497	75.6
496	75.6
495	75.5
494	75.4
493	75.3
492	75.2
491	75.1
490	75
489	74.9
488	74.8
487	74.7
486	74.7
485	74.6
484	74.5
483	74.4
482	74.3
481	74.2
480	74
479	73.9
478	73.8
477	73.7
476	73.6
475	73.5
474	73.3
473	73.2
472	73.1
471	72.9
470	72.8
469	72.7
468	72.5
467	72.4
466	72.2
465	72.1
464	71.9
463	71.8
462	71.7
461	71.5
460	71.3
459	71.2
458	71
457	70.9
456	70.7
455	70.5
454	70.3
453	70.2
452	70
451	69.8
450	69.6
449	69.4
448	69.2
447	69
446	68.8
445	68.6
444	68.4
443	68.2
442	68
441	67.8
440	67.6
439	67.4
438	67.2
437	66.9
436	66.7
435	66.5
434	66.2
433	66
432	65.8
431	65.5
430	65.3
429	65
428	64.7
427	64.4
426	64.2
425	63.9
424	63.6
423	63.3
422	63
421	62.7
420	62.4
419	62.1
418	61.7
417	61.4
416	61.1
415	60.7
414	60.4
413	60
412	59.6
411	59.2
410	58.8
409	58.4
408	58
407	57.6
406	57.2
405	56.7
404	56.2
403	55.8
402	55.3
401	54.8
400	54.3
399	53.8
398	53.2
397	52.7
396	52.1
395	51.5
394	50.9
393	50.3
392	49.6
391	49
390	48.3
389	47.6
388	46.9
387	46.2
386	45.4
385	44.7
384	43.9
383	43.1
382	42.3
381	41.4
380	40.6
379	39.8
378	38.8
377	37.8
376	36.9
375	35.9
374	35
373	34
372	33
371	32
370	30.9
369	29.9
368	28.8
367	27.7
366	26.7
365	25.6
364	24.5
363	23.4
362	22.4
361	21.3
360	20.3
359	19.3
358	18.3
357	17.4
356	16.5
355	15.6
354	14.7
353	13.9
352	13.1
351	12.4
350	11.7
349	11
348	10.4
347	9.8
346	9.2
345	8.7
344	8.2
343	7.8
342	7.4
341	7
340	6.6
339	6.2
338	5.9
337	5.6
336	5.3
335	5
334	4.8
333	4.6
332	4.3
331	4.1
330	3.9
329	3.7
328	3.4
327	3.2
326	3
325	2.8
324	2.5
323	2.3
322	2.1
321	1.8
320	1.6
319	1.3
318	1
317	0.8
316	0.5
315	0.3
314	0.2
313	0.1
312	0.1
311	0.1
310	0.1
309	0.1
308	0.1
307	0.1
306	0.1
305	0.1
304	0.1
303	0.1
302	0.1
301	0.1
300	0.1
299	0.1
298	0.1
297	0.1
296	0.1
295	0.1
294	0.1
293	0.1
292	0.1
291	0.1
290	0.1
289	0.1
288	0.1
287	0.1
286	0.1
285	0.1
284	0.1
283	0.1
282	0.1
281	0.1
280	0.1
279	0.1
278	0
277	0.1
276	0.1
275	0
274	0
273	0
272	0
271	0
270	0
269	0
268	0
267	0
266	0
265	0
264	0
263	0
262	0
261	0
260	0
259	0
258	0
257	0
256	0
255	0
254	0
253	0
252	0
251	0
250	0
249	0
248	0
247	0
246	0
245	0
244	0
243	0
242	0
241	0
240	0
239	0
238	0
237	0
236	0
235	0
234	0
233	0
232	0
231	0
230	0
229	0
228	0
227	0
226	0
225	0
224	0
223	0
222	0
221	0
220	0
219	0
218	0
217	0
216	0
215	0
214	0
213	0
212	0
211	0
210	0
209	0
208	0
207	0
206	0
205	0
204	0
203	0
202	0
201	0
200	0
