# Supplementary material for: Effect of the lignin type on the gas/UV barrier properties of lignin–polyethyleneimine based composite films
Source: Royal Society of Chemistry journal article supplement (doi:10.1039/d5ra07628e), 2026-01-01
Supplement: d5ra07628e35.xlsx [file d5ra07628e35.xlsx]

## Sheet: Sheet1
ﾚﾎﾟｰﾄ:	16:45:19, 10/06/2025
ｻﾝﾌﾟﾙ:	20250410_PEI83SL17-100umPET
ﾌｧｲﾙ名:	20250410_PEI83SL17-100umPET.UDS
分析日時:	10:27:23, 04/10/2025
ｵﾍﾟﾚｰﾀ:	owner
ｺﾒﾝﾄ:
光度計
ﾓﾃﾞﾙ:	U-2900形分光光度計
ｼﾘｱﾙ No.:
ROM Ver.:	2J15301 05
装置条件
測定ﾓｰﾄﾞ:	波長ｽｷｬﾝ
ﾃﾞｰﾀﾓｰﾄﾞ:	%T
開始波長:	800.0 nm
終了波長:	200.0 nm
ｽｷｬﾝｽﾋﾟｰﾄﾞ:	100 nm/min
ｻﾝﾌﾟﾘﾝｸﾞ間隔:	1.0 nm
初期待ち時間:	0 s
繰り返し周期:	0.0 min
測定回数:	1
測定前ｵｰﾄｾﾞﾛ:	Off
ｽﾘｯﾄ:	1.50 nm
光源切換ﾓｰﾄﾞ:	自動切換
光源切換波長:	340.0 nm
ﾍﾞｰｽﾗｲﾝ設定:	ﾕｰｻﾞ 1
ﾚｽﾎﾟﾝｽ:	標準
D2ﾗﾝﾌﾟ:	On
WIﾗﾝﾌﾟ:	On
ｾﾙ長:	10.0 mm
ﾋﾟｰｸ検出
検出方法:	Rectangular
感度:	1
しきい値:	0.01
ﾋﾟｰｸ
ﾋﾟｰｸ No.	開始 (nm)	ﾋﾟｰｸ (nm)	終了 (nm)	高さ (%T)	ﾊﾞﾚｰ (nm)	ﾊﾞﾚｰ (%T)
1	800	759	748	89.2	748	89.3
2	748	732	717	89.3	717	89.4
3	717	701	694	89.3	694	89.3
4	694	692	648	89.3	648	89.4
5	648	646	638	89.3	638	89.4
6	638	581	576	89.1	576	89.1
ﾃﾞｰﾀﾘｽﾄ
nm	%T
800	89.8
799	89.7
798	89.5
797	89.5
796	89.5
795	89.5
794	89.5
793	89.5
792	89.4
791	89.4
790	89.4
789	89.4
788	89.4
787	89.4
786	89.4
785	89.4
784	89.4
783	89.4
782	89.4
781	89.3
780	89.3
779	89.3
778	89.3
777	89.3
776	89.3
775	89.3
774	89.3
773	89.3
772	89.3
771	89.3
770	89.3
769	89.3
768	89.3
767	89.3
766	89.3
765	89.3
764	89.3
763	89.3
762	89.3
761	89.3
760	89.2
759	89.2
758	89.3
757	89.3
756	89.3
755	89.3
754	89.3
753	89.3
752	89.3
751	89.3
750	89.3
749	89.3
748	89.3
747	89.3
746	89.3
745	89.3
744	89.3
743	89.3
742	89.3
741	89.3
740	89.3
739	89.3
738	89.3
737	89.3
736	89.3
735	89.3
734	89.3
733	89.3
732	89.3
731	89.3
730	89.3
729	89.3
728	89.3
727	89.3
726	89.3
725	89.3
724	89.3
723	89.3
722	89.3
721	89.3
720	89.3
719	89.3
718	89.3
717	89.4
716	89.3
715	89.3
714	89.3
713	89.3
712	89.3
711	89.3
710	89.3
709	89.3
708	89.3
707	89.3
706	89.3
705	89.3
704	89.3
703	89.3
702	89.3
701	89.3
700	89.3
699	89.3
698	89.3
697	89.3
696	89.3
695	89.3
694	89.3
693	89.3
692	89.3
691	89.3
690	89.3
689	89.3
688	89.3
687	89.3
686	89.3
685	89.3
684	89.3
683	89.3
682	89.3
681	89.3
680	89.3
679	89.3
678	89.3
677	89.3
676	89.3
675	89.3
674	89.3
673	89.3
672	89.3
671	89.3
670	89.3
669	89.3
668	89.3
667	89.3
666	89.3
665	89.3
664	89.3
663	89.3
662	89.3
661	89.3
660	89.3
659	89.3
658	89.3
657	89.3
656	89.3
655	89.3
654	89.3
653	89.4
652	89.4
651	89.4
650	89.4
649	89.4
648	89.4
647	89.4
646	89.3
645	89.4
644	89.4
643	89.4
642	89.4
641	89.3
640	89.4
639	89.4
638	89.4
637	89.4
636	89.4
635	89.3
634	89.3
633	89.3
632	89.3
631	89.3
630	89.3
629	89.3
628	89.3
627	89.3
626	89.3
625	89.3
624	89.3
623	89.3
622	89.3
621	89.3
620	89.3
619	89.3
618	89.3
617	89.3
616	89.3
615	89.3
614	89.3
613	89.3
612	89.3
611	89.3
610	89.3
609	89.3
608	89.3
607	89.3
606	89.3
605	89.3
604	89.3
603	89.3
602	89.3
601	89.2
600	89.2
599	89.2
598	89.2
597	89.2
596	89.2
595	89.2
594	89.2
593	89.2
592	89.2
591	89.2
590	89.2
589	89.2
588	89.2
587	89.2
586	89.1
585	89.1
584	89.1
583	89.1
582	89.1
581	89.1
580	89.1
579	89.1
578	89.1
577	89.1
576	89.1
575	89.1
574	89.1
573	89.1
572	89.1
571	89.1
570	89.1
569	89.1
568	89.1
567	89.1
566	89.1
565	89.1
564	89.1
563	89
562	89
561	89
560	89
559	89
558	89
557	89
556	89
555	89
554	89
553	89
552	89
551	89
550	89
549	89
548	89
547	89
546	89
545	89
544	88.9
543	88.9
542	89
541	89
540	88.9
539	88.9
538	88.9
537	88.9
536	88.9
535	88.9
534	88.9
533	88.9
532	88.9
531	88.9
530	88.9
529	88.9
528	88.9
527	88.9
526	88.9
525	88.8
524	88.8
523	88.8
522	88.8
521	88.8
520	88.8
519	88.8
518	88.8
517	88.8
516	88.8
515	88.8
514	88.7
513	88.7
512	88.7
511	88.7
510	88.7
509	88.7
508	88.7
507	88.7
506	88.7
505	88.7
504	88.7
503	88.7
502	88.7
501	88.7
500	88.7
499	88.6
498	88.6
497	88.6
496	88.6
495	88.6
494	88.6
493	88.6
492	88.6
491	88.6
490	88.6
489	88.6
488	88.6
487	88.6
486	88.6
485	88.5
484	88.5
483	88.5
482	88.5
481	88.5
480	88.5
479	88.5
478	88.5
477	88.4
476	88.4
475	88.4
474	88.4
473	88.4
472	88.4
471	88.4
470	88.4
469	88.4
468	88.4
467	88.3
466	88.3
465	88.3
464	88.3
463	88.3
462	88.3
461	88.3
460	88.3
459	88.3
458	88.2
457	88.2
456	88.2
455	88.2
454	88.2
453	88.2
452	88.2
451	88.2
450	88.1
449	88.1
448	88.1
447	88.1
446	88.1
445	88.1
444	88.1
443	88.1
442	88
441	88
440	88
439	88
438	88
437	88
436	87.9
435	87.9
434	87.9
433	87.9
432	87.9
431	87.9
430	87.8
429	87.8
428	87.8
427	87.8
426	87.8
425	87.8
424	87.7
423	87.7
422	87.7
421	87.7
420	87.6
419	87.6
418	87.6
417	87.6
416	87.5
415	87.5
414	87.5
413	87.5
412	87.4
411	87.4
410	87.3
409	87.3
408	87.3
407	87.3
406	87.2
405	87.2
404	87.1
403	87.1
402	87
401	87
400	86.9
399	86.9
398	86.8
397	86.7
396	86.7
395	86.6
394	86.6
393	86.5
392	86.4
391	86.4
390	86.3
389	86.3
388	86.2
387	86.1
386	86.1
385	86
384	86
383	85.9
382	85.8
381	85.7
380	85.7
379	85.5
378	85.4
377	85.3
376	85.2
375	85.1
374	85
373	84.9
372	84.8
371	84.6
370	84.5
369	84.3
368	84.2
367	84
366	83.8
365	83.6
364	83.4
363	83.2
362	83
361	82.8
360	82.6
359	82.4
358	82.3
357	82.1
356	81.9
355	81.8
354	81.6
353	81.4
352	81.2
351	81
350	80.8
349	80.5
348	80.3
347	80
346	79.8
345	79.5
344	79.2
343	79
342	78.7
341	78.5
340	78.3
339	78.1
338	78
337	77.8
336	77.5
335	77.2
334	76.8
333	76.4
332	75.8
331	75.1
330	74.3
329	73.2
328	71.9
327	70.4
326	68.6
325	66.5
324	64
323	61.1
322	57.6
321	53.4
320	48.3
319	42
318	34.7
317	26.5
316	18.4
315	11.1
314	5.7
313	2.4
312	0.8
311	0.3
310	0.1
309	0.1
308	0.1
307	0.1
306	0.1
305	0.1
304	0.1
303	0.1
302	0.1
301	0.1
300	0.1
299	0.1
298	0.1
297	0.1
296	0.1
295	0.1
294	0.1
293	0.1
292	0.1
291	0.1
290	0.1
289	0.1
288	0.1
287	0.1
286	0.1
285	0.1
284	0.1
283	0.1
282	0.1
281	0.1
280	0.1
279	0.1
278	0.1
277	0.1
276	0.1
275	0.1
274	0.1
273	0.1
272	0.1
271	0.1
270	0.1
269	0.1
268	0.1
267	0
266	0
265	0
264	0
263	0
262	0
261	0
260	0
259	0
258	0
257	0
256	0
255	0
254	0
253	0
252	0
251	0
250	0
249	0
248	0
247	0
246	0
245	0
244	0
243	0
242	0
241	0
240	0
239	0
238	0
237	0
236	0
235	0
234	0
233	0
232	0
231	0
230	0
229	0
228	0
227	0
226	0
225	0
224	0
223	0
222	0
221	0
220	0
219	0
218	0
217	0
216	0
215	0
214	0
213	0
212	0
211	0
210	0
209	0
208	0
207	0
206	0
205	0
204	0
203	0
202	0
201	0
200	0
