# Supplementary material for: Effect of the lignin type on the gas/UV barrier properties of lignin–polyethyleneimine based composite films
Source: Royal Society of Chemistry journal article supplement (doi:10.1039/d5ra07628e), 2026-01-01
Supplement: d5ra07628e36.xlsx [file d5ra07628e36.xlsx]

## Sheet: Sheet1
ﾚﾎﾟｰﾄ:	16:44:08, 10/06/2025
ｻﾝﾌﾟﾙ:	20250410_PEI90SL10-100umPET
ﾌｧｲﾙ名:	20250311_PEI2benzylchlorideSL1-100umPET_20250410100752.UDS
分析日時:	10:01:18, 04/10/2025
ｵﾍﾟﾚｰﾀ:	owner
ｺﾒﾝﾄ:
光度計
ﾓﾃﾞﾙ:	U-2900形分光光度計
ｼﾘｱﾙ No.:
ROM Ver.:	2J15301 05
装置条件
測定ﾓｰﾄﾞ:	波長ｽｷｬﾝ
ﾃﾞｰﾀﾓｰﾄﾞ:	%T
開始波長:	800.0 nm
終了波長:	200.0 nm
ｽｷｬﾝｽﾋﾟｰﾄﾞ:	100 nm/min
ｻﾝﾌﾟﾘﾝｸﾞ間隔:	1.0 nm
初期待ち時間:	0 s
繰り返し周期:	0.0 min
測定回数:	1
測定前ｵｰﾄｾﾞﾛ:	Off
ｽﾘｯﾄ:	1.50 nm
光源切換ﾓｰﾄﾞ:	自動切換
光源切換波長:	340.0 nm
ﾍﾞｰｽﾗｲﾝ設定:	ﾕｰｻﾞ 1
ﾚｽﾎﾟﾝｽ:	標準
D2ﾗﾝﾌﾟ:	On
WIﾗﾝﾌﾟ:	On
ｾﾙ長:	10.0 mm
ﾋﾟｰｸ検出
検出方法:	Rectangular
感度:	1
しきい値:	0.01
ﾋﾟｰｸ
ﾋﾟｰｸ No.	開始 (nm)	ﾋﾟｰｸ (nm)	終了 (nm)	高さ (%T)	ﾊﾞﾚｰ (nm)	ﾊﾞﾚｰ (%T)
1	800	784	778	89.3	778	89.4
2	778	767	760	89.1	760	89.2
3	760	750	740	88.8	740	89.3
4	740	735	725	89.2	725	89.4
5	725	718	711	89.2	711	89.4
6	711	703	695	89.2	695	89.3
7	695	687	681	89.1	681	89.2
8	681	673	668	88.9	668	89
9	668	660	654	88.8	654	89
10	654	647	641	88.8	641	88.9
11	641	635	629	88.7	629	88.9
12	629	622	618	88.7	618	88.8
13	618	590	584	87.8	584	88.1
14	584	579	575	87.9	575	88.1
15	575	569	565	87.8	565	88
16	565	533	529	87	529	87.1
ﾃﾞｰﾀﾘｽﾄ
nm	%T
800	89.7
799	89.7
798	89.8
797	89.8
796	89.8
795	89.8
794	89.7
793	89.7
792	89.7
791	89.6
790	89.5
789	89.5
788	89.4
787	89.4
786	89.4
785	89.3
784	89.3
783	89.3
782	89.4
781	89.4
780	89.4
779	89.4
778	89.4
777	89.4
776	89.4
775	89.4
774	89.4
773	89.3
772	89.3
771	89.2
770	89.1
769	89.1
768	89.1
767	89.1
766	89.1
765	89.1
764	89.1
763	89.1
762	89.2
761	89.2
760	89.2
759	89.2
758	89.2
757	89.2
756	89.1
755	89.1
754	89
753	88.9
752	88.9
751	88.9
750	88.8
749	88.9
748	88.9
747	88.9
746	89
745	89.1
744	89.2
743	89.2
742	89.3
741	89.3
740	89.3
739	89.3
738	89.3
737	89.2
736	89.2
735	89.2
734	89.2
733	89.2
732	89.2
731	89.2
730	89.3
729	89.3
728	89.4
727	89.4
726	89.4
725	89.4
724	89.4
723	89.4
722	89.3
721	89.3
720	89.2
719	89.2
718	89.2
717	89.2
716	89.2
715	89.3
714	89.3
713	89.4
712	89.4
711	89.4
710	89.4
709	89.4
708	89.4
707	89.3
706	89.3
705	89.2
704	89.2
703	89.2
702	89.2
701	89.2
700	89.2
699	89.2
698	89.3
697	89.3
696	89.3
695	89.3
694	89.3
693	89.3
692	89.2
691	89.2
690	89.1
689	89.1
688	89.1
687	89.1
686	89.1
685	89.1
684	89.1
683	89.2
682	89.2
681	89.2
680	89.2
679	89.1
678	89.1
677	89
676	89
675	88.9
674	88.9
673	88.9
672	88.9
671	89
670	89
669	89
668	89
667	89
666	89
665	89
664	88.9
663	88.9
662	88.8
661	88.8
660	88.8
659	88.8
658	88.8
657	88.9
656	88.9
655	88.9
654	89
653	88.9
652	88.9
651	88.9
650	88.8
649	88.8
648	88.8
647	88.8
646	88.8
645	88.8
644	88.9
643	88.9
642	88.9
641	88.9
640	88.9
639	88.9
638	88.8
637	88.8
636	88.8
635	88.7
634	88.8
633	88.8
632	88.8
631	88.9
630	88.9
629	88.9
628	88.9
627	88.8
626	88.8
625	88.7
624	88.7
623	88.7
622	88.7
621	88.7
620	88.7
619	88.8
618	88.8
617	88.8
616	88.7
615	88.7
614	88.6
613	88.5
612	88.5
611	88.5
610	88.4
609	88.5
608	88.5
607	88.5
606	88.5
605	88.4
604	88.4
603	88.3
602	88.2
601	88.1
600	88.1
599	88.1
598	88.1
597	88.1
596	88.1
595	88.1
594	88.1
593	88
592	87.9
591	87.9
590	87.8
589	87.8
588	87.9
587	87.9
586	88
585	88.1
584	88.1
583	88.1
582	88
581	88
580	88
579	87.9
578	88
577	88
576	88.1
575	88.1
574	88.1
573	88
572	88
571	87.9
570	87.8
569	87.8
568	87.8
567	87.9
566	87.9
565	88
564	88
563	87.9
562	87.8
561	87.7
560	87.7
559	87.7
558	87.7
557	87.7
556	87.8
555	87.8
554	87.7
553	87.6
552	87.5
551	87.4
550	87.4
549	87.4
548	87.5
547	87.5
546	87.5
545	87.4
544	87.3
543	87.2
542	87.2
541	87.2
540	87.2
539	87.2
538	87.2
537	87.2
536	87.2
535	87.1
534	87
533	87
532	87
531	87
530	87.1
529	87.1
528	87.1
527	87.1
526	87
525	86.9
524	86.9
523	86.9
522	87
521	87
520	87
519	86.9
518	86.9
517	86.8
516	86.7
515	86.7
514	86.8
513	86.8
512	86.8
511	86.7
510	86.6
509	86.5
508	86.5
507	86.5
506	86.5
505	86.6
504	86.5
503	86.5
502	86.4
501	86.3
500	86.3
499	86.3
498	86.4
497	86.4
496	86.3
495	86.2
494	86.1
493	86.1
492	86.1
491	86.2
490	86.2
489	86.1
488	86.1
487	86
486	85.9
485	85.9
484	86
483	86
482	85.9
481	85.8
480	85.7
479	85.7
478	85.7
477	85.7
476	85.7
475	85.7
474	85.6
473	85.5
472	85.4
471	85.4
470	85.4
469	85.4
468	85.3
467	85.2
466	85.2
465	85.1
464	85.2
463	85.2
462	85.1
461	85
460	84.9
459	84.9
458	84.9
457	84.9
456	84.8
455	84.7
454	84.6
453	84.6
452	84.6
451	84.5
450	84.5
449	84.4
448	84.3
447	84.2
446	84.2
445	84.2
444	84.1
443	84
442	83.9
441	83.8
440	83.8
439	83.8
438	83.7
437	83.6
436	83.5
435	83.5
434	83.4
433	83.4
432	83.3
431	83.1
430	83.1
429	83
428	82.9
427	82.8
426	82.7
425	82.6
424	82.5
423	82.5
422	82.4
421	82.2
420	82.1
419	82
418	82
417	81.9
416	81.7
415	81.6
414	81.5
413	81.4
412	81.3
411	81.1
410	81
409	80.9
408	80.8
407	80.6
406	80.4
405	80.3
404	80.1
403	80
402	79.8
401	79.6
400	79.4
399	79.3
398	79.1
397	78.9
396	78.6
395	78.4
394	78.2
393	78
392	77.7
391	77.5
390	77.3
389	77
388	76.7
387	76.5
386	76.2
385	75.9
384	75.6
383	75.3
382	75
381	74.6
380	74.3
379	73.9
378	73.5
377	73.1
376	72.7
375	72.3
374	71.8
373	71.4
372	70.9
371	70.4
370	69.8
369	69.3
368	68.7
367	68.1
366	67.4
365	66.8
364	66.1
363	65.4
362	64.7
361	64
360	63.3
359	62.6
358	61.9
357	61.2
356	60.4
355	59.7
354	59
353	58.2
352	57.4
351	56.7
350	55.9
349	55.1
348	54.4
347	53.6
346	52.9
345	52.1
344	51.4
343	50.7
342	50.1
341	49.4
340	48.7
339	48.1
338	47.4
337	46.8
336	46.2
335	45.6
334	44.9
333	44.2
332	43.6
331	42.8
330	41.9
329	41
328	39.8
327	38.6
326	37.2
325	35.7
324	34
323	32.1
322	29.9
321	27.4
320	24.4
319	21
318	17.1
317	12.9
316	8.8
315	5.3
314	2.7
313	1.1
312	0.4
311	0.2
310	0.1
309	0.1
308	0.1
307	0.1
306	0.1
305	0.1
304	0.1
303	0.1
302	0.1
301	0.1
300	0.1
299	0.1
298	0.1
297	0.1
296	0.1
295	0.1
294	0.1
293	0.1
292	0.1
291	0.1
290	0.1
289	0.1
288	0.1
287	0.1
286	0.1
285	0.1
284	0.1
283	0.1
282	0.1
281	0.1
280	0.1
279	0.1
278	0.1
277	0.1
276	0.1
275	0.1
274	0.1
273	0.1
272	0
271	0
270	0
269	0
268	0
267	0
266	0
265	0
264	0
263	0
262	0
261	0
260	0
259	0
258	0
257	0
256	0
255	0
254	0
253	0
252	0
251	0
250	0
249	0
248	0
247	0
246	0
245	0
244	0
243	0
242	0
241	0
240	0
239	0
238	0
237	0
236	0
235	0
234	0
233	0
232	0
231	0
230	0
229	0
228	0
227	0
226	0
225	0
224	0
223	0
222	0
221	0
220	0
219	0
218	0
217	0
216	0
215	0
214	0
213	0
212	0
211	0
210	0
209	0
208	0
207	0
206	0
205	0
204	0
203	0
202	0
201	0
200	0
