# Supplementary material for: Effect of the lignin type on the gas/UV barrier properties of lignin–polyethyleneimine based composite films
Source: Royal Society of Chemistry journal article supplement (doi:10.1039/d5ra07628e), 2026-01-01
Supplement: d5ra07628e37.xlsx [file d5ra07628e37.xlsx]

## Sheet: Sheet1
ﾚﾎﾟｰﾄ:	16:33:46, 10/06/2025
ｻﾝﾌﾟﾙ:	20250425_PEI50(1800)LS50-100umPET
ﾌｧｲﾙ名:	20250425_PEI50(1800)LS50-100umPET.UDS
分析日時:	16:38:49, 04/25/2025
ｵﾍﾟﾚｰﾀ:	owner
ｺﾒﾝﾄ:
光度計
ﾓﾃﾞﾙ:	U-2900形分光光度計
ｼﾘｱﾙ No.:
ROM Ver.:	2J15301 05
装置条件
測定ﾓｰﾄﾞ:	波長ｽｷｬﾝ
ﾃﾞｰﾀﾓｰﾄﾞ:	%T
開始波長:	800.0 nm
終了波長:	200.0 nm
ｽｷｬﾝｽﾋﾟｰﾄﾞ:	100 nm/min
ｻﾝﾌﾟﾘﾝｸﾞ間隔:	1.0 nm
初期待ち時間:	0 s
繰り返し周期:	0.0 min
測定回数:	1
測定前ｵｰﾄｾﾞﾛ:	Off
ｽﾘｯﾄ:	1.50 nm
光源切換ﾓｰﾄﾞ:	自動切換
光源切換波長:	340.0 nm
ﾍﾞｰｽﾗｲﾝ設定:	ﾕｰｻﾞ 1
ﾚｽﾎﾟﾝｽ:	標準
D2ﾗﾝﾌﾟ:	On
WIﾗﾝﾌﾟ:	On
ｾﾙ長:	10.0 mm
ﾋﾟｰｸ検出
検出方法:	Rectangular
感度:	1
しきい値:	0.01
ﾋﾟｰｸ
ﾋﾟｰｸ No.	開始 (nm)	ﾋﾟｰｸ (nm)	終了 (nm)	高さ (%T)	ﾊﾞﾚｰ (nm)	ﾊﾞﾚｰ (%T)
1	800	742	738	70.5	738	70.5
ﾃﾞｰﾀﾘｽﾄ
nm	%T
800	71.5
799	71.4
798	71.4
797	71.4
796	71.4
795	71.3
794	71.3
793	71.3
792	71.3
791	71.3
790	71.3
789	71.2
788	71.2
787	71.2
786	71.2
785	71.2
784	71.1
783	71.1
782	71.1
781	71.1
780	71.1
779	71.1
778	71
777	71
776	71
775	71
774	71
773	70.9
772	70.9
771	70.9
770	70.9
769	70.9
768	70.9
767	70.8
766	70.8
765	70.8
764	70.8
763	70.8
762	70.8
761	70.7
760	70.7
759	70.7
758	70.7
757	70.7
756	70.7
755	70.7
754	70.6
753	70.6
752	70.6
751	70.6
750	70.6
749	70.6
748	70.5
747	70.5
746	70.5
745	70.5
744	70.5
743	70.5
742	70.5
741	70.5
740	70.5
739	70.5
738	70.5
737	70.5
736	70.5
735	70.5
734	70.5
733	70.4
732	70.4
731	70.4
730	70.4
729	70.4
728	70.4
727	70.4
726	70.3
725	70.3
724	70.3
723	70.3
722	70.3
721	70.3
720	70.3
719	70.2
718	70.2
717	70.2
716	70.2
715	70.2
714	70.2
713	70.1
712	70.1
711	70.1
710	70.1
709	70.1
708	70.1
707	70
706	70
705	70
704	70
703	70
702	70
701	69.9
700	69.9
699	69.9
698	69.9
697	69.9
696	69.8
695	69.8
694	69.8
693	69.8
692	69.8
691	69.7
690	69.7
689	69.7
688	69.7
687	69.7
686	69.6
685	69.6
684	69.6
683	69.6
682	69.5
681	69.5
680	69.5
679	69.5
678	69.5
677	69.4
676	69.4
675	69.4
674	69.4
673	69.3
672	69.3
671	69.3
670	69.3
669	69.2
668	69.2
667	69.2
666	69.2
665	69.1
664	69.1
663	69.1
662	69.1
661	69
660	69
659	69
658	69
657	68.9
656	68.9
655	68.9
654	68.8
653	68.8
652	68.8
651	68.8
650	68.7
649	68.7
648	68.7
647	68.6
646	68.6
645	68.6
644	68.6
643	68.5
642	68.5
641	68.5
640	68.4
639	68.4
638	68.4
637	68.3
636	68.3
635	68.3
634	68.2
633	68.2
632	68.2
631	68.1
630	68.1
629	68.1
628	68
627	68
626	68
625	67.9
624	67.9
623	67.8
622	67.8
621	67.8
620	67.7
619	67.7
618	67.6
617	67.6
616	67.6
615	67.5
614	67.5
613	67.4
612	67.4
611	67.3
610	67.3
609	67.2
608	67.2
607	67.1
606	67.1
605	67
604	67
603	66.9
602	66.9
601	66.8
600	66.7
599	66.7
598	66.6
597	66.5
596	66.5
595	66.4
594	66.4
593	66.3
592	66.3
591	66.2
590	66.1
589	66.1
588	66
587	66
586	65.9
585	65.9
584	65.8
583	65.8
582	65.7
581	65.7
580	65.7
579	65.6
578	65.6
577	65.5
576	65.4
575	65.4
574	65.3
573	65.2
572	65.2
571	65.1
570	65
569	65
568	64.9
567	64.8
566	64.7
565	64.7
564	64.6
563	64.5
562	64.4
561	64.4
560	64.3
559	64.2
558	64.1
557	64
556	63.9
555	63.9
554	63.8
553	63.7
552	63.6
551	63.5
550	63.4
549	63.3
548	63.2
547	63.1
546	63.1
545	63
544	62.9
543	62.8
542	62.7
541	62.6
540	62.5
539	62.4
538	62.3
537	62.2
536	62.1
535	62
534	61.9
533	61.8
532	61.7
531	61.6
530	61.5
529	61.4
528	61.3
527	61.1
526	61
525	60.9
524	60.8
523	60.7
522	60.6
521	60.5
520	60.4
519	60.2
518	60.1
517	60
516	59.9
515	59.7
514	59.6
513	59.5
512	59.4
511	59.2
510	59.1
509	59
508	58.8
507	58.7
506	58.6
505	58.4
504	58.3
503	58.1
502	58
501	57.9
500	57.7
499	57.6
498	57.4
497	57.3
496	57.1
495	57
494	56.8
493	56.6
492	56.5
491	56.3
490	56.2
489	56
488	55.8
487	55.6
486	55.5
485	55.3
484	55.1
483	54.9
482	54.7
481	54.5
480	54.4
479	54.2
478	54
477	53.8
476	53.6
475	53.4
474	53.2
473	53
472	52.8
471	52.6
470	52.4
469	52.2
468	52
467	51.7
466	51.5
465	51.3
464	51
463	50.8
462	50.6
461	50.3
460	50.1
459	49.9
458	49.6
457	49.4
456	49.1
455	48.8
454	48.6
453	48.3
452	48
451	47.7
450	47.5
449	47.2
448	46.9
447	46.6
446	46.3
445	46
444	45.7
443	45.4
442	45
441	44.7
440	44.4
439	44.1
438	43.8
437	43.4
436	43.1
435	42.7
434	42.3
433	42
432	41.6
431	41.2
430	40.8
429	40.5
428	40.1
427	39.7
426	39.2
425	38.8
424	38.4
423	38
422	37.6
421	37.1
420	36.7
419	36.2
418	35.8
417	35.3
416	34.9
415	34.4
414	33.9
413	33.4
412	32.9
411	32.5
410	32
409	31.5
408	31
407	30.4
406	29.9
405	29.4
404	28.9
403	28.3
402	27.8
401	27.3
400	26.7
399	26.2
398	25.7
397	25.1
396	24.6
395	24
394	23.5
393	22.9
392	22.4
391	21.8
390	21.3
389	20.7
388	20.1
387	19.6
386	19
385	18.4
384	17.9
383	17.3
382	16.8
381	16.2
380	15.7
379	15.1
378	14.5
377	13.9
376	13.3
375	12.8
374	12.2
373	11.7
372	11.2
371	10.7
370	10.2
369	9.7
368	9.2
367	8.8
366	8.4
365	8
364	7.6
363	7.2
362	6.9
361	6.6
360	6.3
359	6
358	5.7
357	5.5
356	5.2
355	5
354	4.7
353	4.5
352	4.3
351	4.1
350	3.9
349	3.7
348	3.5
347	3.3
346	3.1
345	3
344	2.8
343	2.6
342	2.5
341	2.3
340	2.2
339	2.1
338	1.9
337	1.8
336	1.7
335	1.6
334	1.5
333	1.4
332	1.3
331	1.2
330	1.2
329	1.1
328	1
327	1
326	0.9
325	0.8
324	0.7
323	0.7
322	0.6
321	0.5
320	0.5
319	0.4
318	0.3
317	0.3
316	0.2
315	0.1
314	0.1
313	0.1
312	0.1
311	0.1
310	0.1
309	0.1
308	0.1
307	0.1
306	0.1
305	0.1
304	0.1
303	0.1
302	0.1
301	0.1
300	0.1
299	0.1
298	0.1
297	0.1
296	0.1
295	0.1
294	0.1
293	0.1
292	0.1
291	0.1
290	0.1
289	0.1
288	0.1
287	0.1
286	0.1
285	0.1
284	0.1
283	0.1
282	0.1
281	0.1
280	0.1
279	0.1
278	0.1
277	0.1
276	0.1
275	0.1
274	0.1
273	0.1
272	0.1
271	0
270	0
269	0
268	0
267	0
266	0
265	0
264	0
263	0
262	0
261	0
260	0
259	0
258	0
257	0
256	0
255	0
254	0
253	0
252	0
251	0
250	0
249	0
248	0
247	0
246	0
245	0
244	0
243	0
242	0
241	0
240	0
239	0
238	0
237	0
236	0
235	0
234	0
233	0
232	0
231	0
230	0
229	0
228	0
227	0
226	0
225	0
224	0
223	0
222	0
221	0
220	0
219	0
218	0
217	0
216	0
215	0
214	0
213	0
212	0
211	0
210	0
209	0
208	0
207	0
206	0
205	0
204	0
203	0
202	0
201	0
200	0
