# Supplementary material for: Effect of the lignin type on the gas/UV barrier properties of lignin–polyethyleneimine based composite films
Source: Royal Society of Chemistry journal article supplement (doi:10.1039/d5ra07628e), 2026-01-01
Supplement: d5ra07628e38.xlsx [file d5ra07628e38.xlsx]

## Sheet: Sheet1
ﾚﾎﾟｰﾄ:	16:34:13, 10/06/2025
ｻﾝﾌﾟﾙ:	20250425_PEI50(70000)LS50-100umPET
ﾌｧｲﾙ名:	20250425_PEI50(70000)LS50-100umPET.UDS
分析日時:	16:31:25, 04/25/2025
ｵﾍﾟﾚｰﾀ:	owner
ｺﾒﾝﾄ:
光度計
ﾓﾃﾞﾙ:	U-2900形分光光度計
ｼﾘｱﾙ No.:
ROM Ver.:	2J15301 05
装置条件
測定ﾓｰﾄﾞ:	波長ｽｷｬﾝ
ﾃﾞｰﾀﾓｰﾄﾞ:	%T
開始波長:	800.0 nm
終了波長:	200.0 nm
ｽｷｬﾝｽﾋﾟｰﾄﾞ:	100 nm/min
ｻﾝﾌﾟﾘﾝｸﾞ間隔:	1.0 nm
初期待ち時間:	0 s
繰り返し周期:	0.0 min
測定回数:	1
測定前ｵｰﾄｾﾞﾛ:	Off
ｽﾘｯﾄ:	1.50 nm
光源切換ﾓｰﾄﾞ:	自動切換
光源切換波長:	340.0 nm
ﾍﾞｰｽﾗｲﾝ設定:	ﾕｰｻﾞ 1
ﾚｽﾎﾟﾝｽ:	標準
D2ﾗﾝﾌﾟ:	On
WIﾗﾝﾌﾟ:	On
ｾﾙ長:	10.0 mm
ﾋﾟｰｸ検出
検出方法:	Rectangular
感度:	1
しきい値:	0.01
ﾋﾟｰｸ
ﾋﾟｰｸ No.	開始 (nm)	ﾋﾟｰｸ (nm)	終了 (nm)	高さ (%T)	ﾊﾞﾚｰ (nm)	ﾊﾞﾚｰ (%T)
1	800	794	783	84.1	783	84.2
2	783	753	737	83.3	737	83.9
3	737	715	703	83.4	703	83.6
4	703	679	667	82.9	667	83.1
5	667	650	637	82.7	637	82.9
6	637	594	584	81.2	584	81.4
ﾃﾞｰﾀﾘｽﾄ
nm	%T
800	84.2
799	84.2
798	84.2
797	84.1
796	84.1
795	84.1
794	84.1
793	84.1
792	84.1
791	84.1
790	84.1
789	84.1
788	84.2
787	84.2
786	84.2
785	84.2
784	84.2
783	84.2
782	84.2
781	84.2
780	84.1
779	84.1
778	84.1
777	84.1
776	84.1
775	84
774	84
773	84
772	83.9
771	83.9
770	83.8
769	83.8
768	83.7
767	83.7
766	83.7
765	83.6
764	83.6
763	83.5
762	83.5
761	83.5
760	83.4
759	83.4
758	83.4
757	83.4
756	83.4
755	83.3
754	83.3
753	83.3
752	83.4
751	83.4
750	83.4
749	83.4
748	83.4
747	83.5
746	83.5
745	83.5
744	83.6
743	83.7
742	83.7
741	83.8
740	83.8
739	83.9
738	83.9
737	83.9
736	83.9
735	83.9
734	83.9
733	83.9
732	83.9
731	83.9
730	83.8
729	83.8
728	83.7
727	83.7
726	83.7
725	83.6
724	83.6
723	83.6
722	83.5
721	83.5
720	83.5
719	83.5
718	83.4
717	83.5
716	83.4
715	83.4
714	83.4
713	83.4
712	83.5
711	83.5
710	83.5
709	83.5
708	83.5
707	83.6
706	83.6
705	83.6
704	83.6
703	83.6
702	83.6
701	83.6
700	83.6
699	83.6
698	83.6
697	83.6
696	83.5
695	83.5
694	83.4
693	83.4
692	83.4
691	83.3
690	83.3
689	83.2
688	83.2
687	83.1
686	83.1
685	83
684	83
683	83
682	83
681	82.9
680	82.9
679	82.9
678	82.9
677	82.9
676	83
675	83
674	83
673	83
672	83
671	83.1
670	83.1
669	83.1
668	83.1
667	83.1
666	83.1
665	83.1
664	83.1
663	83
662	83
661	83
660	82.9
659	82.9
658	82.9
657	82.8
656	82.8
655	82.8
654	82.7
653	82.7
652	82.7
651	82.7
650	82.7
649	82.7
648	82.7
647	82.7
646	82.7
645	82.7
644	82.8
643	82.8
642	82.8
641	82.8
640	82.9
639	82.9
638	82.9
637	82.9
636	82.9
635	82.8
634	82.8
633	82.8
632	82.7
631	82.7
630	82.6
629	82.6
628	82.5
627	82.5
626	82.4
625	82.4
624	82.3
623	82.3
622	82.2
621	82.2
620	82.2
619	82.2
618	82.2
617	82.2
616	82.2
615	82.2
614	82.2
613	82.2
612	82.2
611	82.2
610	82.1
609	82.1
608	82.1
607	82
606	81.9
605	81.9
604	81.8
603	81.7
602	81.7
601	81.6
600	81.5
599	81.4
598	81.3
597	81.3
596	81.3
595	81.2
594	81.2
593	81.2
592	81.2
591	81.3
590	81.3
589	81.3
588	81.3
587	81.4
586	81.4
585	81.4
584	81.4
583	81.4
582	81.4
581	81.3
580	81.3
579	81.2
578	81.2
577	81.1
576	81.1
575	81
574	80.9
573	80.9
572	80.9
571	80.9
570	80.8
569	80.8
568	80.8
567	80.8
566	80.8
565	80.8
564	80.8
563	80.8
562	80.7
561	80.7
560	80.6
559	80.5
558	80.5
557	80.4
556	80.3
555	80.2
554	80.1
553	80
552	79.9
551	79.9
550	79.8
549	79.8
548	79.8
547	79.7
546	79.7
545	79.7
544	79.7
543	79.7
542	79.7
541	79.7
540	79.6
539	79.6
538	79.5
537	79.5
536	79.4
535	79.3
534	79.2
533	79.2
532	79.1
531	79
530	79
529	79
528	78.9
527	78.9
526	78.9
525	78.9
524	78.9
523	78.9
522	78.8
521	78.8
520	78.7
519	78.6
518	78.5
517	78.4
516	78.3
515	78.2
514	78.1
513	78
512	77.9
511	77.8
510	77.8
509	77.8
508	77.7
507	77.7
506	77.7
505	77.7
504	77.6
503	77.6
502	77.5
501	77.4
500	77.3
499	77.2
498	77.1
497	77
496	76.9
495	76.8
494	76.7
493	76.7
492	76.6
491	76.6
490	76.6
489	76.5
488	76.5
487	76.4
486	76.3
485	76.2
484	76.1
483	75.9
482	75.8
481	75.6
480	75.5
479	75.4
478	75.3
477	75.2
476	75.1
475	75.1
474	75
473	75
472	74.9
471	74.8
470	74.7
469	74.6
468	74.4
467	74.3
466	74.1
465	74
464	73.9
463	73.7
462	73.6
461	73.5
460	73.4
459	73.4
458	73.3
457	73.1
456	73
455	72.8
454	72.7
453	72.5
452	72.3
451	72.1
450	71.9
449	71.7
448	71.6
447	71.5
446	71.3
445	71.2
444	71.1
443	70.9
442	70.7
441	70.6
440	70.3
439	70.1
438	69.9
437	69.7
436	69.5
435	69.3
434	69.1
433	68.9
432	68.7
431	68.5
430	68.3
429	68
428	67.8
427	67.5
426	67.2
425	66.9
424	66.6
423	66.4
422	66.1
421	65.9
420	65.7
419	65.4
418	65.1
417	64.8
416	64.5
415	64.2
414	63.8
413	63.4
412	63.1
411	62.8
410	62.4
409	62.1
408	61.8
407	61.5
406	61.1
405	60.7
404	60.3
403	59.9
402	59.5
401	59.1
400	58.7
399	58.3
398	57.9
397	57.4
396	57
395	56.5
394	56.1
393	55.6
392	55.1
391	54.6
390	54.1
389	53.6
388	53.1
387	52.6
386	52.1
385	51.5
384	51
383	50.4
382	49.8
381	49.2
380	48.6
379	48
378	47.3
377	46.6
376	46
375	45.3
374	44.6
373	43.8
372	43.1
371	42.4
370	41.6
369	40.9
368	40.2
367	39.5
366	38.8
365	38
364	37.3
363	36.7
362	36
361	35.4
360	34.7
359	34.1
358	33.5
357	32.9
356	32.3
355	31.7
354	31.1
353	30.5
352	30
351	29.4
350	28.8
349	28.2
348	27.5
347	26.9
346	26.3
345	25.7
344	25.1
343	24.5
342	23.9
341	23.3
340	22.7
339	22.2
338	21.6
337	21
336	20.5
335	20
334	19.5
333	18.9
332	18.4
331	17.8
330	17.3
329	16.6
328	16
327	15.3
326	14.6
325	13.8
324	13
323	12.1
322	11.1
321	10
320	8.8
319	7.5
318	6
317	4.4
316	3
315	1.8
314	0.9
313	0.4
312	0.2
311	0.1
310	0.1
309	0.1
308	0.1
307	0.1
306	0.1
305	0.1
304	0.1
303	0.1
302	0.1
301	0.1
300	0.1
299	0.1
298	0.1
297	0.1
296	0.1
295	0.1
294	0.1
293	0.1
292	0.1
291	0.1
290	0.1
289	0.1
288	0.1
287	0.1
286	0.1
285	0.1
284	0.1
283	0.1
282	0.1
281	0.1
280	0.1
279	0.1
278	0.1
277	0.1
276	0.1
275	0.1
274	0.1
273	0.1
272	0.1
271	0.1
270	0.1
269	0
268	0
267	0
266	0
265	0
264	0
263	0
262	0
261	0
260	0
259	0
258	0
257	0
256	0
255	0
254	0
253	0
252	0
251	0
250	0
249	0
248	0
247	0
246	0
245	0
244	0
243	0
242	0
241	0
240	0
239	0
238	0
237	0
236	0
235	0
234	0
233	0
232	0
231	0
230	0
229	0
228	0
227	0
226	0
225	0
224	0
223	0
222	0
221	0
220	0
219	0
218	0
217	0
216	0
215	0
214	0
213	0
212	0
211	0
210	0
209	0
208	0
207	0
206	0
205	0
204	0
203	0
202	0
201	0
200	0
