# Supplementary material for: Effect of the lignin type on the gas/UV barrier properties of lignin–polyethyleneimine based composite films
Source: Royal Society of Chemistry journal article supplement (doi:10.1039/d5ra07628e), 2026-01-01
Supplement: d5ra07628e39.xlsx [file d5ra07628e39.xlsx]

## Sheet: Sheet1
ﾚﾎﾟｰﾄ:	16:33:14, 10/06/2025
ｻﾝﾌﾟﾙ:	20250425_PEI50SL50-100umPET
ﾌｧｲﾙ名:	20250425_PEI50SL50-100umPET.UDS
分析日時:	15:49:35, 04/25/2025
ｵﾍﾟﾚｰﾀ:	owner
ｺﾒﾝﾄ:
光度計
ﾓﾃﾞﾙ:	U-2900形分光光度計
ｼﾘｱﾙ No.:
ROM Ver.:	2J15301 05
装置条件
測定ﾓｰﾄﾞ:	波長ｽｷｬﾝ
ﾃﾞｰﾀﾓｰﾄﾞ:	%T
開始波長:	800.0 nm
終了波長:	200.0 nm
ｽｷｬﾝｽﾋﾟｰﾄﾞ:	100 nm/min
ｻﾝﾌﾟﾘﾝｸﾞ間隔:	1.0 nm
初期待ち時間:	0 s
繰り返し周期:	0.0 min
測定回数:	1
測定前ｵｰﾄｾﾞﾛ:	Off
ｽﾘｯﾄ:	1.50 nm
光源切換ﾓｰﾄﾞ:	自動切換
光源切換波長:	340.0 nm
ﾍﾞｰｽﾗｲﾝ設定:	ﾕｰｻﾞ 1
ﾚｽﾎﾟﾝｽ:	標準
D2ﾗﾝﾌﾟ:	On
WIﾗﾝﾌﾟ:	On
ｾﾙ長:	10.0 mm
ﾃﾞｰﾀﾘｽﾄ
nm	%T
800	85.6
799	85.6
798	85.6
797	85.6
796	85.6
795	85.6
794	85.6
793	85.6
792	85.6
791	85.5
790	85.5
789	85.5
788	85.5
787	85.5
786	85.5
785	85.4
784	85.4
783	85.4
782	85.4
781	85.4
780	85.4
779	85.4
778	85.3
777	85.3
776	85.3
775	85.3
774	85.3
773	85.3
772	85.3
771	85.3
770	85.3
769	85.2
768	85.2
767	85.2
766	85.2
765	85.2
764	85.2
763	85.2
762	85.2
761	85.1
760	85.1
759	85.1
758	85.1
757	85.1
756	85.1
755	85.1
754	85.1
753	85.1
752	85
751	85
750	85
749	85
748	85
747	85
746	85
745	84.9
744	84.9
743	84.9
742	84.9
741	84.9
740	84.9
739	84.9
738	84.9
737	84.9
736	84.9
735	84.8
734	84.8
733	84.8
732	84.8
731	84.8
730	84.8
729	84.8
728	84.8
727	84.8
726	84.7
725	84.7
724	84.7
723	84.7
722	84.7
721	84.7
720	84.7
719	84.7
718	84.7
717	84.6
716	84.6
715	84.6
714	84.6
713	84.6
712	84.6
711	84.6
710	84.6
709	84.5
708	84.5
707	84.5
706	84.5
705	84.5
704	84.5
703	84.5
702	84.5
701	84.4
700	84.4
699	84.4
698	84.4
697	84.4
696	84.4
695	84.4
694	84.4
693	84.3
692	84.3
691	84.3
690	84.3
689	84.3
688	84.3
687	84.3
686	84.2
685	84.2
684	84.2
683	84.2
682	84.2
681	84.2
680	84.1
679	84.1
678	84.1
677	84.1
676	84.1
675	84.1
674	84
673	84
672	84
671	84
670	84
669	83.9
668	83.9
667	83.9
666	83.9
665	83.9
664	83.8
663	83.8
662	83.8
661	83.8
660	83.8
659	83.8
658	83.7
657	83.7
656	83.7
655	83.7
654	83.6
653	83.6
652	83.6
651	83.6
650	83.6
649	83.5
648	83.5
647	83.5
646	83.5
645	83.4
644	83.4
643	83.4
642	83.4
641	83.3
640	83.3
639	83.3
638	83.3
637	83.2
636	83.2
635	83.2
634	83.2
633	83.2
632	83.1
631	83.1
630	83.1
629	83
628	83
627	83
626	83
625	82.9
624	82.9
623	82.9
622	82.8
621	82.8
620	82.8
619	82.8
618	82.7
617	82.7
616	82.7
615	82.6
614	82.6
613	82.6
612	82.5
611	82.5
610	82.5
609	82.5
608	82.4
607	82.4
606	82.3
605	82.3
604	82.3
603	82.3
602	82.2
601	82.2
600	82.1
599	82.1
598	82
597	82
596	81.9
595	81.9
594	81.8
593	81.8
592	81.8
591	81.7
590	81.7
589	81.6
588	81.6
587	81.5
586	81.5
585	81.4
584	81.4
583	81.3
582	81.3
581	81.2
580	81.2
579	81.1
578	81.1
577	81
576	81
575	81
574	80.9
573	80.9
572	80.8
571	80.8
570	80.7
569	80.6
568	80.6
567	80.5
566	80.5
565	80.4
564	80.4
563	80.3
562	80.3
561	80.2
560	80.1
559	80.1
558	80
557	80
556	79.9
555	79.8
554	79.8
553	79.7
552	79.6
551	79.6
550	79.5
549	79.5
548	79.4
547	79.3
546	79.3
545	79.2
544	79.1
543	79
542	79
541	78.9
540	78.8
539	78.7
538	78.7
537	78.6
536	78.5
535	78.4
534	78.3
533	78.3
532	78.2
531	78.1
530	78
529	77.9
528	77.8
527	77.7
526	77.7
525	77.6
524	77.5
523	77.4
522	77.3
521	77.2
520	77.1
519	77
518	76.9
517	76.8
516	76.7
515	76.6
514	76.5
513	76.4
512	76.3
511	76.2
510	76.1
509	76
508	75.9
507	75.8
506	75.7
505	75.6
504	75.5
503	75.3
502	75.2
501	75.1
500	75
499	74.9
498	74.8
497	74.6
496	74.5
495	74.4
494	74.3
493	74.1
492	74
491	73.9
490	73.7
489	73.6
488	73.5
487	73.3
486	73.2
485	73
484	72.9
483	72.8
482	72.6
481	72.5
480	72.3
479	72.1
478	72
477	71.8
476	71.7
475	71.5
474	71.3
473	71.2
472	71
471	70.8
470	70.6
469	70.5
468	70.3
467	70.1
466	69.9
465	69.7
464	69.5
463	69.3
462	69.1
461	68.9
460	68.7
459	68.5
458	68.3
457	68.1
456	67.9
455	67.6
454	67.4
453	67.2
452	67
451	66.7
450	66.5
449	66.2
448	66
447	65.7
446	65.5
445	65.2
444	64.9
443	64.6
442	64.4
441	64.1
440	63.8
439	63.5
438	63.2
437	62.9
436	62.6
435	62.3
434	61.9
433	61.6
432	61.3
431	60.9
430	60.6
429	60.2
428	59.8
427	59.5
426	59.1
425	58.7
424	58.3
423	57.9
422	57.5
421	57
420	56.6
419	56.2
418	55.7
417	55.3
416	54.8
415	54.3
414	53.9
413	53.4
412	52.8
411	52.3
410	51.8
409	51.3
408	50.7
407	50.2
406	49.6
405	49.1
404	48.5
403	47.9
402	47.4
401	46.8
400	46.2
399	45.6
398	44.9
397	44.3
396	43.7
395	43.1
394	42.4
393	41.7
392	41.1
391	40.4
390	39.7
389	39.1
388	38.4
387	37.7
386	37
385	36.3
384	35.5
383	34.8
382	34.1
381	33.4
380	32.7
379	31.9
378	31.1
377	30.3
376	29.5
375	28.7
374	28
373	27.2
372	26.4
371	25.7
370	24.9
369	24.2
368	23.5
367	22.8
366	22.1
365	21.4
364	20.8
363	20.2
362	19.6
361	19
360	18.5
359	18
358	17.5
357	17
356	16.5
355	16.1
354	15.6
353	15.2
352	14.7
351	14.3
350	13.8
349	13.4
348	13
347	12.6
346	12.1
345	11.7
344	11.3
343	10.9
342	10.5
341	10.2
340	9.8
339	9.5
338	9.1
337	8.7
336	8.4
335	8.1
334	7.8
333	7.6
332	7.3
331	7
330	6.7
329	6.4
328	6.1
327	5.8
326	5.5
325	5.1
324	4.8
323	4.4
322	4
321	3.6
320	3.1
319	2.6
318	2.1
317	1.5
316	1
315	0.6
314	0.3
313	0.2
312	0.1
311	0.1
310	0.1
309	0.1
308	0.1
307	0.1
306	0.1
305	0.1
304	0.1
303	0.1
302	0.1
301	0.1
300	0.1
299	0.1
298	0.1
297	0.1
296	0.1
295	0.1
294	0.1
293	0.1
292	0.1
291	0.1
290	0.1
289	0.1
288	0.1
287	0.1
286	0.1
285	0.1
284	0
283	0
282	0
281	0
280	0
279	0
278	0
277	0
276	0
275	0
274	0
273	0
272	0
271	0
270	0
269	0
268	0
267	0
266	0
265	0
264	0
263	0
262	0
261	0
260	0
259	0
258	0
257	0
256	0
255	0
254	0
253	0
252	0
251	0
250	0
249	0
248	0
247	0
246	0
245	0
244	0
243	0
242	0
241	0
240	0
239	0
238	0
237	0
236	0
235	0
234	0
233	0
232	0
231	0
230	0
229	0
228	0
227	0
226	0
225	0
224	0
223	0
222	0
221	0
220	0
219	0
218	0
217	0
216	0
215	0
214	0
213	0
212	0
211	0
210	0
209	0
208	0
207	0
206	0
205	0
204	0
203	0
202	0
201	0
200	0
