# Supplementary material for: Effect of the lignin type on the gas/UV barrier properties of lignin–polyethyleneimine based composite films
Source: Royal Society of Chemistry journal article supplement (doi:10.1039/d5ra07628e), 2026-01-01
Supplement: d5ra07628e40.xlsx [file d5ra07628e40.xlsx]

## Sheet: Sheet1
ﾚﾎﾟｰﾄ:	16:41:44, 10/06/2025
ｻﾝﾌﾟﾙ:	20250425_PEI50(Mw600)SL50-100umPET
ﾌｧｲﾙ名:	20250425_PEI50(Mw600)SL50-100umPET.UDS
分析日時:	16:09:32, 04/25/2025
ｵﾍﾟﾚｰﾀ:	owner
ｺﾒﾝﾄ:
光度計
ﾓﾃﾞﾙ:	U-2900形分光光度計
ｼﾘｱﾙ No.:
ROM Ver.:	2J15301 05
装置条件
測定ﾓｰﾄﾞ:	波長ｽｷｬﾝ
ﾃﾞｰﾀﾓｰﾄﾞ:	%T
開始波長:	800.0 nm
終了波長:	200.0 nm
ｽｷｬﾝｽﾋﾟｰﾄﾞ:	100 nm/min
ｻﾝﾌﾟﾘﾝｸﾞ間隔:	1.0 nm
初期待ち時間:	0 s
繰り返し周期:	0.0 min
測定回数:	1
測定前ｵｰﾄｾﾞﾛ:	Off
ｽﾘｯﾄ:	1.50 nm
光源切換ﾓｰﾄﾞ:	自動切換
光源切換波長:	340.0 nm
ﾍﾞｰｽﾗｲﾝ設定:	ﾕｰｻﾞ 1
ﾚｽﾎﾟﾝｽ:	標準
D2ﾗﾝﾌﾟ:	On
WIﾗﾝﾌﾟ:	On
ｾﾙ長:	10.0 mm
ﾃﾞｰﾀﾘｽﾄ
nm	%T
800	78.8
799	78.8
798	78.8
797	78.8
796	78.8
795	78.8
794	78.7
793	78.7
792	78.7
791	78.6
790	78.6
789	78.6
788	78.5
787	78.5
786	78.4
785	78.4
784	78.4
783	78.3
782	78.3
781	78.3
780	78.3
779	78.3
778	78.3
777	78.2
776	78.2
775	78.2
774	78.1
773	78.1
772	78
771	78
770	78
769	77.9
768	77.9
767	77.9
766	77.9
765	77.9
764	77.9
763	77.8
762	77.8
761	77.8
760	77.7
759	77.7
758	77.7
757	77.6
756	77.6
755	77.6
754	77.5
753	77.5
752	77.5
751	77.5
750	77.5
749	77.4
748	77.4
747	77.3
746	77.3
745	77.2
744	77.2
743	77.1
742	77.1
741	77.1
740	77.1
739	77.1
738	77.1
737	77.1
736	77.1
735	77
734	77
733	77
732	76.9
731	76.9
730	76.8
729	76.8
728	76.8
727	76.7
726	76.7
725	76.7
724	76.7
723	76.7
722	76.6
721	76.6
720	76.5
719	76.5
718	76.5
717	76.4
716	76.4
715	76.3
714	76.3
713	76.3
712	76.3
711	76.2
710	76.2
709	76.2
708	76.1
707	76.1
706	76
705	76
704	76
703	75.9
702	75.9
701	75.8
700	75.8
699	75.8
698	75.8
697	75.7
696	75.7
695	75.6
694	75.6
693	75.5
692	75.5
691	75.5
690	75.4
689	75.4
688	75.3
687	75.3
686	75.3
685	75.2
684	75.2
683	75.1
682	75.1
681	75
680	75
679	75
678	74.9
677	74.9
676	74.8
675	74.8
674	74.7
673	74.7
672	74.7
671	74.6
670	74.5
669	74.5
668	74.4
667	74.4
666	74.3
665	74.3
664	74.3
663	74.2
662	74.2
661	74.1
660	74
659	74
658	73.9
657	73.9
656	73.8
655	73.8
654	73.7
653	73.7
652	73.6
651	73.5
650	73.5
649	73.4
648	73.3
647	73.3
646	73.2
645	73.2
644	73.1
643	73
642	73
641	72.9
640	72.8
639	72.8
638	72.7
637	72.6
636	72.6
635	72.5
634	72.4
633	72.4
632	72.3
631	72.2
630	72.1
629	72.1
628	72
627	71.9
626	71.8
625	71.8
624	71.7
623	71.6
622	71.5
621	71.4
620	71.4
619	71.3
618	71.2
617	71.1
616	71
615	71
614	70.9
613	70.8
612	70.7
611	70.6
610	70.5
609	70.4
608	70.3
607	70.3
606	70.2
605	70.1
604	70
603	69.9
602	69.8
601	69.7
600	69.6
599	69.5
598	69.4
597	69.3
596	69.2
595	69.1
594	69
593	68.9
592	68.8
591	68.7
590	68.6
589	68.5
588	68.4
587	68.3
586	68.2
585	68.1
584	68
583	67.9
582	67.9
581	67.8
580	67.7
579	67.6
578	67.5
577	67.4
576	67.3
575	67.2
574	67.1
573	67.1
572	67
571	66.9
570	66.8
569	66.7
568	66.6
567	66.5
566	66.4
565	66.3
564	66.3
563	66.2
562	66.1
561	66
560	65.9
559	65.8
558	65.7
557	65.6
556	65.6
555	65.5
554	65.4
553	65.3
552	65.2
551	65.1
550	65
549	64.9
548	64.8
547	64.7
546	64.6
545	64.5
544	64.3
543	64.2
542	64.1
541	64
540	63.9
539	63.8
538	63.6
537	63.5
536	63.4
535	63.3
534	63.1
533	63
532	62.8
531	62.7
530	62.6
529	62.4
528	62.3
527	62.2
526	62
525	61.9
524	61.8
523	61.6
522	61.5
521	61.4
520	61.2
519	61.1
518	60.9
517	60.8
516	60.7
515	60.6
514	60.4
513	60.3
512	60.2
511	60
510	59.9
509	59.8
508	59.7
507	59.5
506	59.4
505	59.3
504	59.1
503	59
502	58.9
501	58.8
500	58.6
499	58.5
498	58.4
497	58.3
496	58.1
495	58
494	57.9
493	57.7
492	57.6
491	57.4
490	57.3
489	57.2
488	57
487	56.9
486	56.7
485	56.6
484	56.4
483	56.3
482	56.1
481	56
480	55.8
479	55.7
478	55.5
477	55.3
476	55.2
475	55
474	54.8
473	54.6
472	54.5
471	54.3
470	54.1
469	53.9
468	53.7
467	53.5
466	53.3
465	53.1
464	52.9
463	52.7
462	52.4
461	52.2
460	52
459	51.8
458	51.5
457	51.3
456	51.1
455	50.9
454	50.6
453	50.4
452	50.1
451	49.9
450	49.6
449	49.4
448	49.1
447	48.8
446	48.6
445	48.3
444	48
443	47.8
442	47.5
441	47.2
440	46.9
439	46.6
438	46.3
437	46
436	45.7
435	45.4
434	45.1
433	44.8
432	44.5
431	44.1
430	43.8
429	43.5
428	43.1
427	42.8
426	42.4
425	42
424	41.6
423	41.3
422	40.9
421	40.5
420	40.1
419	39.7
418	39.2
417	38.8
416	38.4
415	37.9
414	37.4
413	37
412	36.5
411	36
410	35.5
409	35
408	34.4
407	33.9
406	33.3
405	32.8
404	32.2
403	31.6
402	31
401	30.4
400	29.8
399	29.2
398	28.6
397	27.9
396	27.3
395	26.7
394	26
393	25.3
392	24.7
391	24
390	23.3
389	22.7
388	22
387	21.3
386	20.6
385	20
384	19.3
383	18.6
382	18
381	17.3
380	16.7
379	16.1
378	15.3
377	14.6
376	14
375	13.4
374	12.7
373	12.1
372	11.5
371	10.9
370	10.3
369	9.7
368	9.1
367	8.6
366	8
365	7.5
364	7
363	6.5
362	6.1
361	5.6
360	5.2
359	4.8
358	4.4
357	4.1
356	3.7
355	3.4
354	3.1
353	2.9
352	2.6
351	2.4
350	2.2
349	2
348	1.8
347	1.7
346	1.5
345	1.4
344	1.3
343	1.2
342	1.1
341	1
340	0.9
339	0.9
338	0.8
337	0.7
336	0.7
335	0.6
334	0.6
333	0.6
332	0.5
331	0.5
330	0.5
329	0.4
328	0.4
327	0.4
326	0.3
325	0.3
324	0.3
323	0.2
322	0.2
321	0.2
320	0.2
319	0.2
318	0.1
317	0.1
316	0.1
315	0.1
314	0.1
313	0.1
312	0.1
311	0.1
310	0.1
309	0.1
308	0.1
307	0.1
306	0.1
305	0.1
304	0.1
303	0.1
302	0.1
301	0.1
300	0.1
299	0.1
298	0.1
297	0.1
296	0.1
295	0.1
294	0.1
293	0.1
292	0.1
291	0.1
290	0.1
289	0.1
288	0.1
287	0.1
286	0.1
285	0.1
284	0.1
283	0.1
282	0.1
281	0.1
280	0.1
279	0.1
278	0.1
277	0.1
276	0.1
275	0.1
274	0
273	0
272	0
271	0
270	0
269	0
268	0
267	0
266	0
265	0
264	0
263	0
262	0
261	0
260	0
259	0
258	0
257	0
256	0
255	0
254	0
253	0
252	0
251	0
250	0
249	0
248	0
247	0
246	0
245	0
244	0
243	0
242	0
241	0
240	0
239	0
238	0
237	0
236	0
235	0
234	0
233	0
232	0
231	0
230	0
229	0
228	0
227	0
226	0
225	0
224	0
223	0
222	0
221	0
220	0
219	0
218	0
217	0
216	0
215	0
214	0
213	0
212	0
211	0
210	0
209	0
208	0
207	0
206	0
205	0
204	0
203	0
202	0
201	0
200	0
