# Supplementary material for: Effect of the lignin type on the gas/UV barrier properties of lignin–polyethyleneimine based composite films
Source: Royal Society of Chemistry journal article supplement (doi:10.1039/d5ra07628e), 2026-01-01
Supplement: d5ra07628e41.xlsx [file d5ra07628e41.xlsx]

## Sheet: Sheet1
ﾚﾎﾟｰﾄ:	16:29:12, 10/06/2025
ｻﾝﾌﾟﾙ:	20250502_PEI50(10000)SL50-100umPET
ﾌｧｲﾙ名:	20250502_PEI50(10000)Soda50-100umPET.UDS
分析日時:	14:35:36, 05/02/2025
ｵﾍﾟﾚｰﾀ:	owner
ｺﾒﾝﾄ:
光度計
ﾓﾃﾞﾙ:	U-2900形分光光度計
ｼﾘｱﾙ No.:
ROM Ver.:	2J15301 05
装置条件
測定ﾓｰﾄﾞ:	波長ｽｷｬﾝ
ﾃﾞｰﾀﾓｰﾄﾞ:	%T
開始波長:	800.0 nm
終了波長:	200.0 nm
ｽｷｬﾝｽﾋﾟｰﾄﾞ:	100 nm/min
ｻﾝﾌﾟﾘﾝｸﾞ間隔:	1.0 nm
初期待ち時間:	0 s
繰り返し周期:	0.0 min
測定回数:	1
測定前ｵｰﾄｾﾞﾛ:	Off
ｽﾘｯﾄ:	1.50 nm
光源切換ﾓｰﾄﾞ:	自動切換
光源切換波長:	340.0 nm
ﾍﾞｰｽﾗｲﾝ設定:	ﾕｰｻﾞ 1
ﾚｽﾎﾟﾝｽ:	標準
D2ﾗﾝﾌﾟ:	On
WIﾗﾝﾌﾟ:	On
ｾﾙ長:	10.0 mm
ﾋﾟｰｸ検出
検出方法:	Rectangular
感度:	1
しきい値:	0.01
ﾋﾟｰｸ
ﾋﾟｰｸ No.	開始 (nm)	ﾋﾟｰｸ (nm)	終了 (nm)	高さ (%T)	ﾊﾞﾚｰ (nm)	ﾊﾞﾚｰ (%T)
1	800	359	341	0.1	341	0.1
ﾃﾞｰﾀﾘｽﾄ
nm	%T
800	83.5
799	83.5
798	83.4
797	83.4
796	83.3
795	83.2
794	83.1
793	83
792	82.9
791	82.9
790	82.8
789	82.7
788	82.6
787	82.5
786	82.4
785	82.4
784	82.3
783	82.2
782	82.2
781	82.1
780	82
779	81.9
778	81.8
777	81.7
776	81.6
775	81.6
774	81.5
773	81.4
772	81.3
771	81.2
770	81.1
769	81
768	80.9
767	80.8
766	80.7
765	80.6
764	80.6
763	80.5
762	80.4
761	80.3
760	80.2
759	80.1
758	80
757	79.9
756	79.8
755	79.7
754	79.6
753	79.5
752	79.3
751	79.3
750	79.2
749	79.1
748	79
747	78.9
746	78.8
745	78.7
744	78.6
743	78.5
742	78.4
741	78.3
740	78.2
739	78
738	77.9
737	77.8
736	77.7
735	77.6
734	77.5
733	77.4
732	77.3
731	77.2
730	77
729	76.9
728	76.8
727	76.7
726	76.5
725	76.4
724	76.3
723	76.1
722	76
721	75.9
720	75.7
719	75.6
718	75.5
717	75.4
716	75.3
715	75.1
714	75
713	74.9
712	74.7
711	74.6
710	74.4
709	74.3
708	74.1
707	74
706	73.9
705	73.7
704	73.6
703	73.5
702	73.3
701	73.2
700	73.1
699	72.9
698	72.8
697	72.7
696	72.5
695	72.3
694	72.2
693	72
692	71.9
691	71.7
690	71.6
689	71.4
688	71.3
687	71.2
686	71
685	70.9
684	70.7
683	70.5
682	70.4
681	70.2
680	70
679	69.8
678	69.7
677	69.5
676	69.3
675	69.2
674	69
673	68.9
672	68.7
671	68.5
670	68.3
669	68.2
668	68
667	67.8
666	67.6
665	67.4
664	67.2
663	67
662	66.9
661	66.7
660	66.5
659	66.4
658	66.2
657	66
656	65.8
655	65.5
654	65.3
653	65.1
652	64.9
651	64.8
650	64.6
649	64.4
648	64.2
647	64
646	63.8
645	63.6
644	63.4
643	63.1
642	62.9
641	62.7
640	62.5
639	62.3
638	62.1
637	61.9
636	61.7
635	61.5
634	61.3
633	61
632	60.8
631	60.6
630	60.3
629	60.1
628	59.9
627	59.7
626	59.5
625	59.2
624	59
623	58.8
622	58.5
621	58.3
620	58.1
619	57.8
618	57.6
617	57.3
616	57.1
615	56.9
614	56.6
613	56.4
612	56.1
611	55.9
610	55.6
609	55.4
608	55.1
607	54.8
606	54.6
605	54.4
604	54.1
603	53.8
602	53.6
601	53.3
600	53.1
599	52.8
598	52.5
597	52.2
596	51.9
595	51.7
594	51.4
593	51.2
592	50.9
591	50.6
590	50.3
589	50.1
588	49.8
587	49.5
586	49.2
585	49
584	48.7
583	48.4
582	48.1
581	47.9
580	47.6
579	47.3
578	47
577	46.7
576	46.4
575	46.1
574	45.8
573	45.5
572	45.2
571	44.8
570	44.5
569	44.2
568	43.9
567	43.6
566	43.2
565	42.9
564	42.6
563	42.3
562	41.9
561	41.6
560	41.3
559	40.9
558	40.6
557	40.2
556	39.9
555	39.6
554	39.2
553	38.8
552	38.5
551	38.1
550	37.8
549	37.4
548	37.1
547	36.7
546	36.4
545	36
544	35.6
543	35.3
542	34.9
541	34.6
540	34.2
539	33.9
538	33.5
537	33.2
536	32.8
535	32.5
534	32.1
533	31.8
532	31.5
531	31.1
530	30.8
529	30.4
528	30.1
527	29.7
526	29.4
525	29
524	28.7
523	28.4
522	28.1
521	27.7
520	27.4
519	27.1
518	26.7
517	26.4
516	26.1
515	25.8
514	25.4
513	25.1
512	24.8
511	24.4
510	24.1
509	23.8
508	23.5
507	23.2
506	22.9
505	22.5
504	22.2
503	21.9
502	21.6
501	21.3
500	21
499	20.7
498	20.4
497	20.1
496	19.8
495	19.5
494	19.2
493	18.9
492	18.6
491	18.3
490	18
489	17.7
488	17.4
487	17.1
486	16.8
485	16.5
484	16.2
483	16
482	15.7
481	15.4
480	15.1
479	14.8
478	14.6
477	14.3
476	14
475	13.8
474	13.5
473	13.2
472	13
471	12.7
470	12.4
469	12.2
468	11.9
467	11.7
466	11.4
465	11.2
464	10.9
463	10.7
462	10.4
461	10.2
460	9.9
459	9.7
458	9.5
457	9.2
456	9
455	8.8
454	8.5
453	8.3
452	8.1
451	7.8
450	7.6
449	7.4
448	7.1
447	6.9
446	6.7
445	6.4
444	6.2
443	6
442	5.8
441	5.6
440	5.4
439	5.2
438	5
437	4.8
436	4.6
435	4.4
434	4.2
433	4
432	3.8
431	3.7
430	3.5
429	3.3
428	3.2
427	3
426	2.9
425	2.8
424	2.6
423	2.5
422	2.4
421	2.3
420	2.2
419	2.1
418	2
417	1.9
416	1.8
415	1.7
414	1.6
413	1.5
412	1.4
411	1.3
410	1.2
409	1.2
408	1.1
407	1
406	1
405	0.9
404	0.8
403	0.8
402	0.7
401	0.7
400	0.6
399	0.6
398	0.5
397	0.5
396	0.5
395	0.4
394	0.4
393	0.4
392	0.3
391	0.3
390	0.3
389	0.3
388	0.2
387	0.2
386	0.2
385	0.2
384	0.2
383	0.2
382	0.2
381	0.2
380	0.2
379	0.2
378	0.2
377	0.2
376	0.1
375	0.1
374	0.1
373	0.1
372	0.1
371	0.1
370	0.1
369	0.1
368	0.1
367	0.1
366	0.1
365	0.1
364	0.1
363	0.1
362	0.1
361	0.1
360	0.1
359	0.1
358	0.1
357	0.1
356	0.1
355	0.1
354	0.1
353	0.1
352	0.1
351	0.1
350	0.1
349	0.1
348	0.1
347	0.1
346	0.1
345	0.1
344	0.1
343	0.1
342	0.1
341	0.1
340	0.1
339	0.1
338	0.1
337	0.1
336	0.1
335	0.1
334	0.1
333	0.1
332	0.1
331	0.1
330	0.1
329	0.1
328	0.1
327	0.1
326	0.1
325	0.1
324	0.1
323	0.1
322	0.1
321	0.1
320	0.1
319	0.1
318	0.1
317	0.1
316	0.1
315	0.1
314	0.1
313	0.1
312	0.1
311	0.1
310	0.1
309	0.1
308	0.1
307	0.1
306	0.1
305	0.1
304	0.1
303	0.1
302	0.1
301	0.1
300	0.1
299	0.1
298	0.1
297	0.1
296	0.1
295	0.1
294	0.1
293	0.1
292	0.1
291	0.1
290	0.1
289	0.1
288	0.1
287	0.1
286	0.1
285	0.1
284	0.1
283	0.1
282	0.1
281	0.1
280	0.1
279	0.1
278	0.1
277	0.1
276	0.1
275	0.1
274	0.1
273	0.1
272	0.1
271	0.1
270	0.1
269	0
268	0
267	0
266	0
265	0
264	0
263	0
262	0
261	0
260	0
259	0
258	0
257	0
256	0
255	0
254	0
253	0
252	0
251	0
250	0
249	0
248	0
247	0
246	0
245	0
244	0
243	0
242	0
241	0
240	0
239	0
238	0
237	0
236	0
235	0
234	0
233	0
232	0
231	0
230	0
229	0
228	0
227	0
226	0
225	0
224	0
223	0
222	0
221	0
220	0
219	0
218	0
217	0
216	0
215	0
214	0
213	0
212	0
211	0
210	0
209	0
208	0
207	0
206	0
205	0
204	0
203	0
202	0
201	0
200	0
