# Supplementary material for: Effect of the lignin type on the gas/UV barrier properties of lignin–polyethyleneimine based composite films
Source: Royal Society of Chemistry journal article supplement (doi:10.1039/d5ra07628e), 2026-01-01
Supplement: d5ra07628e42.xlsx [file d5ra07628e42.xlsx]

## Sheet: Sheet1
ﾚﾎﾟｰﾄ:	16:41:57, 10/06/2025
ｻﾝﾌﾟﾙ:	20250502_PEI50(70000)SL50-100umPET
ﾌｧｲﾙ名:	20250502_PEI50(70000)SL50-100umPET.UDS
分析日時:	14:11:34, 05/02/2025
ｵﾍﾟﾚｰﾀ:	owner
ｺﾒﾝﾄ:
光度計
ﾓﾃﾞﾙ:	U-2900形分光光度計
ｼﾘｱﾙ No.:
ROM Ver.:	2J15301 05
装置条件
測定ﾓｰﾄﾞ:	波長ｽｷｬﾝ
ﾃﾞｰﾀﾓｰﾄﾞ:	%T
開始波長:	800.0 nm
終了波長:	200.0 nm
ｽｷｬﾝｽﾋﾟｰﾄﾞ:	100 nm/min
ｻﾝﾌﾟﾘﾝｸﾞ間隔:	1.0 nm
初期待ち時間:	0 s
繰り返し周期:	0.0 min
測定回数:	1
測定前ｵｰﾄｾﾞﾛ:	Off
ｽﾘｯﾄ:	1.50 nm
光源切換ﾓｰﾄﾞ:	自動切換
光源切換波長:	340.0 nm
ﾍﾞｰｽﾗｲﾝ設定:	ﾕｰｻﾞ 1
ﾚｽﾎﾟﾝｽ:	標準
D2ﾗﾝﾌﾟ:	On
WIﾗﾝﾌﾟ:	On
ｾﾙ長:	10.0 mm
ﾃﾞｰﾀﾘｽﾄ
nm	%T
800	88.6
799	88.6
798	88.6
797	88.6
796	88.6
795	88.6
794	88.6
793	88.5
792	88.5
791	88.5
790	88.5
789	88.5
788	88.5
787	88.4
786	88.4
785	88.4
784	88.4
783	88.4
782	88.4
781	88.3
780	88.3
779	88.3
778	88.3
777	88.3
776	88.2
775	88.2
774	88.2
773	88.2
772	88.2
771	88.2
770	88.1
769	88.1
768	88.1
767	88.1
766	88.1
765	88.1
764	88.1
763	88
762	88
761	88
760	88
759	88
758	88
757	88
756	88
755	87.9
754	87.9
753	87.9
752	87.9
751	87.9
750	87.8
749	87.8
748	87.8
747	87.8
746	87.8
745	87.7
744	87.7
743	87.7
742	87.6
741	87.6
740	87.6
739	87.6
738	87.5
737	87.5
736	87.5
735	87.5
734	87.5
733	87.4
732	87.4
731	87.4
730	87.4
729	87.3
728	87.3
727	87.3
726	87.3
725	87.2
724	87.2
723	87.2
722	87.2
721	87.2
720	87.1
719	87.1
718	87.1
717	87
716	87
715	87
714	87
713	86.9
712	86.9
711	86.9
710	86.9
709	86.8
708	86.8
707	86.8
706	86.7
705	86.7
704	86.7
703	86.6
702	86.6
701	86.6
700	86.5
699	86.5
698	86.5
697	86.5
696	86.4
695	86.4
694	86.4
693	86.3
692	86.3
691	86.3
690	86.2
689	86.2
688	86.1
687	86.1
686	86.1
685	86
684	86
683	86
682	85.9
681	85.9
680	85.8
679	85.8
678	85.8
677	85.7
676	85.7
675	85.6
674	85.6
673	85.6
672	85.5
671	85.5
670	85.4
669	85.4
668	85.3
667	85.3
666	85.2
665	85.2
664	85.1
663	85.1
662	85
661	85
660	84.9
659	84.9
658	84.8
657	84.8
656	84.7
655	84.7
654	84.6
653	84.6
652	84.5
651	84.4
650	84.4
649	84.3
648	84.3
647	84.2
646	84.1
645	84.1
644	84
643	83.9
642	83.9
641	83.8
640	83.7
639	83.7
638	83.6
637	83.5
636	83.5
635	83.4
634	83.3
633	83.2
632	83.2
631	83.1
630	83
629	82.9
628	82.9
627	82.8
626	82.7
625	82.6
624	82.5
623	82.5
622	82.4
621	82.3
620	82.2
619	82.1
618	82.1
617	82
616	81.9
615	81.8
614	81.7
613	81.6
612	81.5
611	81.4
610	81.3
609	81.3
608	81.2
607	81.1
606	81
605	80.9
604	80.8
603	80.7
602	80.6
601	80.5
600	80.4
599	80.3
598	80.2
597	80.1
596	80
595	79.9
594	79.8
593	79.7
592	79.6
591	79.4
590	79.3
589	79.2
588	79.1
587	79
586	78.9
585	78.8
584	78.7
583	78.6
582	78.5
581	78.4
580	78.3
579	78.2
578	78.1
577	78
576	77.9
575	77.8
574	77.7
573	77.7
572	77.6
571	77.5
570	77.4
569	77.3
568	77.2
567	77.1
566	77
565	76.9
564	76.8
563	76.8
562	76.7
561	76.6
560	76.5
559	76.4
558	76.3
557	76.2
556	76.1
555	76
554	75.9
553	75.8
552	75.7
551	75.6
550	75.5
549	75.4
548	75.3
547	75.2
546	75.1
545	74.9
544	74.8
543	74.7
542	74.6
541	74.4
540	74.3
539	74.2
538	74
537	73.9
536	73.7
535	73.6
534	73.4
533	73.3
532	73.1
531	73
530	72.8
529	72.6
528	72.5
527	72.3
526	72.2
525	72
524	71.9
523	71.7
522	71.5
521	71.4
520	71.2
519	71.1
518	70.9
517	70.8
516	70.6
515	70.5
514	70.4
513	70.2
512	70.1
511	69.9
510	69.8
509	69.7
508	69.5
507	69.4
506	69.3
505	69.1
504	69
503	68.9
502	68.7
501	68.6
500	68.5
499	68.3
498	68.2
497	68.1
496	67.9
495	67.8
494	67.7
493	67.5
492	67.4
491	67.3
490	67.1
489	67
488	66.8
487	66.7
486	66.5
485	66.4
484	66.3
483	66.1
482	65.9
481	65.8
480	65.6
479	65.5
478	65.3
477	65.1
476	64.9
475	64.8
474	64.6
473	64.4
472	64.2
471	64
470	63.8
469	63.6
468	63.4
467	63.2
466	62.9
465	62.7
464	62.5
463	62.2
462	62
461	61.8
460	61.5
459	61.3
458	61
457	60.8
456	60.5
455	60.2
454	60
453	59.7
452	59.4
451	59.1
450	58.9
449	58.6
448	58.3
447	58
446	57.7
445	57.4
444	57.1
443	56.8
442	56.5
441	56.2
440	55.8
439	55.5
438	55.2
437	54.8
436	54.5
435	54.2
434	53.8
433	53.4
432	53.1
431	52.7
430	52.3
429	51.9
428	51.6
427	51.2
426	50.8
425	50.3
424	49.9
423	49.5
422	49.1
421	48.6
420	48.2
419	47.7
418	47.2
417	46.8
416	46.3
415	45.8
414	45.3
413	44.8
412	44.2
411	43.7
410	43.2
409	42.6
408	42.1
407	41.5
406	40.9
405	40.3
404	39.7
403	39.1
402	38.5
401	37.8
400	37.2
399	36.5
398	35.8
397	35.1
396	34.4
395	33.7
394	33
393	32.2
392	31.5
391	30.7
390	29.9
389	29.1
388	28.3
387	27.5
386	26.7
385	25.9
384	25
383	24.2
382	23.3
381	22.5
380	21.7
379	20.9
378	19.9
377	19
376	18.1
375	17.3
374	16.4
373	15.6
372	14.7
371	13.9
370	13.1
369	12.3
368	11.5
367	10.7
366	10
365	9.2
364	8.5
363	7.9
362	7.2
361	6.6
360	6.1
359	5.5
358	5
357	4.6
356	4.2
355	3.8
354	3.4
353	3.1
352	2.8
351	2.5
350	2.2
349	2
348	1.8
347	1.6
346	1.5
345	1.3
344	1.2
343	1.1
342	1
341	0.9
340	0.9
339	0.8
338	0.7
337	0.6
336	0.6
335	0.5
334	0.5
333	0.5
332	0.4
331	0.4
330	0.4
329	0.4
328	0.3
327	0.3
326	0.3
325	0.3
324	0.2
323	0.2
322	0.2
321	0.2
320	0.1
319	0.1
318	0.1
317	0.1
316	0.1
315	0.1
314	0.1
313	0.1
312	0.1
311	0.1
310	0.1
309	0.1
308	0.1
307	0.1
306	0.1
305	0.1
304	0.1
303	0.1
302	0.1
301	0.1
300	0.1
299	0.1
298	0.1
297	0.1
296	0.1
295	0.1
294	0.1
293	0.1
292	0.1
291	0.1
290	0.1
289	0.1
288	0.1
287	0.1
286	0.1
285	0.1
284	0.1
283	0.1
282	0.1
281	0.1
280	0.1
279	0.1
278	0.1
277	0.1
276	0.1
275	0.1
274	0.1
273	0.1
272	0
271	0
270	0
269	0
268	0
267	0
266	0
265	0
264	0
263	0
262	0
261	0
260	0
259	0
258	0
257	0
256	0
255	0
254	0
253	0
252	0
251	0
250	0
249	0
248	0
247	0
246	0
245	0
244	0
243	0
242	0
241	0
240	0
239	0
238	0
237	0
236	0
235	0
234	0
233	0
232	0
231	0
230	0
229	0
228	0
227	0
226	0
225	0
224	0
223	0
222	0
221	0
220	0
219	0
218	0
217	0
216	0
215	0
214	0
213	0
212	0
211	0
210	0
209	0
208	0
207	0
206	0
205	0
204	0
203	0
202	0
201	0
200	0
