# Supplementary material for: Effect of the lignin type on the gas/UV barrier properties of lignin–polyethyleneimine based composite films
Source: Royal Society of Chemistry journal article supplement (doi:10.1039/d5ra07628e), 2026-01-01
Supplement: d5ra07628e43.xlsx [file d5ra07628e43.xlsx]

## Sheet: Sheet1
ﾚﾎﾟｰﾄ:	16:28:36, 10/06/2025
ｻﾝﾌﾟﾙ:	20250507_PEI50(1800)Soda50-100umPET
ﾌｧｲﾙ名:	20250507_PEI50(1800)Soda50-100umPET.UDS
分析日時:	14:59:52, 05/07/2025
ｵﾍﾟﾚｰﾀ:	owner
ｺﾒﾝﾄ:
光度計
ﾓﾃﾞﾙ:	U-2900形分光光度計
ｼﾘｱﾙ No.:
ROM Ver.:	2J15301 05
装置条件
測定ﾓｰﾄﾞ:	波長ｽｷｬﾝ
ﾃﾞｰﾀﾓｰﾄﾞ:	%T
開始波長:	800.0 nm
終了波長:	200.0 nm
ｽｷｬﾝｽﾋﾟｰﾄﾞ:	100 nm/min
ｻﾝﾌﾟﾘﾝｸﾞ間隔:	1.0 nm
初期待ち時間:	0 s
繰り返し周期:	0.0 min
測定回数:	1
測定前ｵｰﾄｾﾞﾛ:	Off
ｽﾘｯﾄ:	1.50 nm
光源切換ﾓｰﾄﾞ:	自動切換
光源切換波長:	340.0 nm
ﾍﾞｰｽﾗｲﾝ設定:	ﾕｰｻﾞ 1
ﾚｽﾎﾟﾝｽ:	標準
D2ﾗﾝﾌﾟ:	On
WIﾗﾝﾌﾟ:	On
ｾﾙ長:	10.0 mm
ﾃﾞｰﾀﾘｽﾄ
nm	%T
800	54.4
799	54.4
798	54.3
797	54.3
796	54.3
795	54.2
794	54.2
793	54.1
792	54.1
791	54.1
790	54
789	54
788	53.9
787	53.9
786	53.8
785	53.8
784	53.7
783	53.7
782	53.7
781	53.6
780	53.6
779	53.5
778	53.5
777	53.4
776	53.4
775	53.3
774	53.3
773	53.3
772	53.2
771	53.2
770	53.1
769	53.1
768	53
767	53
766	52.9
765	52.9
764	52.8
763	52.8
762	52.7
761	52.7
760	52.6
759	52.6
758	52.5
757	52.5
756	52.4
755	52.4
754	52.3
753	52.3
752	52.2
751	52.2
750	52.1
749	52
748	52
747	51.9
746	51.8
745	51.7
744	51.7
743	51.6
742	51.6
741	51.5
740	51.5
739	51.5
738	51.5
737	51.4
736	51.4
735	51.3
734	51.3
733	51.2
732	51.2
731	51.1
730	51.1
729	51
728	51
727	50.9
726	50.8
725	50.8
724	50.7
723	50.7
722	50.6
721	50.6
720	50.5
719	50.5
718	50.4
717	50.4
716	50.3
715	50.2
714	50.2
713	50.1
712	50.1
711	50
710	50
709	49.9
708	49.8
707	49.8
706	49.7
705	49.7
704	49.6
703	49.6
702	49.5
701	49.4
700	49.4
699	49.3
698	49.3
697	49.2
696	49.1
695	49.1
694	49
693	49
692	48.9
691	48.8
690	48.8
689	48.7
688	48.7
687	48.6
686	48.5
685	48.5
684	48.4
683	48.3
682	48.3
681	48.2
680	48.1
679	48.1
678	48
677	47.9
676	47.9
675	47.8
674	47.7
673	47.7
672	47.6
671	47.5
670	47.4
669	47.4
668	47.3
667	47.2
666	47.2
665	47.1
664	47
663	46.9
662	46.9
661	46.8
660	46.7
659	46.6
658	46.6
657	46.5
656	46.4
655	46.3
654	46.3
653	46.2
652	46.1
651	46
650	46
649	45.9
648	45.8
647	45.7
646	45.6
645	45.6
644	45.5
643	45.4
642	45.3
641	45.3
640	45.2
639	45.1
638	45
637	44.9
636	44.9
635	44.8
634	44.7
633	44.6
632	44.5
631	44.4
630	44.4
629	44.3
628	44.2
627	44.1
626	44
625	43.9
624	43.9
623	43.8
622	43.7
621	43.6
620	43.5
619	43.4
618	43.3
617	43.2
616	43.2
615	43.1
614	43
613	42.9
612	42.8
611	42.7
610	42.6
609	42.5
608	42.4
607	42.3
606	42.2
605	42.1
604	42
603	41.9
602	41.8
601	41.7
600	41.5
599	41.3
598	41.2
597	41.1
596	41
595	40.9
594	40.7
593	40.6
592	40.5
591	40.4
590	40.3
589	40.2
588	40.1
587	39.9
586	39.8
585	39.7
584	39.6
583	39.5
582	39.4
581	39.3
580	39.2
579	39.2
578	39.1
577	39
576	38.9
575	38.7
574	38.6
573	38.5
572	38.4
571	38.3
570	38.2
569	38.1
568	37.9
567	37.8
566	37.7
565	37.6
564	37.5
563	37.4
562	37.2
561	37.1
560	37
559	36.9
558	36.7
557	36.6
556	36.5
555	36.4
554	36.2
553	36.1
552	36
551	35.9
550	35.7
549	35.6
548	35.5
547	35.3
546	35.2
545	35.1
544	34.9
543	34.8
542	34.7
541	34.5
540	34.4
539	34.3
538	34.1
537	34
536	33.9
535	33.7
534	33.6
533	33.5
532	33.3
531	33.2
530	33
529	32.9
528	32.8
527	32.6
526	32.5
525	32.4
524	32.3
523	32.1
522	32
521	31.9
520	31.7
519	31.6
518	31.5
517	31.3
516	31.2
515	31.1
514	30.9
513	30.8
512	30.7
511	30.5
510	30.4
509	30.3
508	30.1
507	30
506	29.9
505	29.7
504	29.6
503	29.5
502	29.3
501	29.2
500	29.1
499	28.9
498	28.8
497	28.7
496	28.5
495	28.4
494	28.3
493	28.1
492	28
491	27.8
490	27.7
489	27.6
488	27.4
487	27.3
486	27.1
485	27
484	26.9
483	26.7
482	26.6
481	26.4
480	26.3
479	26.2
478	26
477	25.9
476	25.8
475	25.6
474	25.5
473	25.4
472	25.2
471	25.1
470	25
469	24.8
468	24.7
467	24.5
466	24.4
465	24.3
464	24.1
463	24
462	23.9
461	23.7
460	23.6
459	23.4
458	23.3
457	23.2
456	23
455	22.9
454	22.7
453	22.6
452	22.4
451	22.3
450	22.1
449	22
448	21.8
447	21.7
446	21.5
445	21.4
444	21.2
443	21
442	20.9
441	20.7
440	20.6
439	20.4
438	20.3
437	20.1
436	19.9
435	19.8
434	19.6
433	19.5
432	19.3
431	19.1
430	19
429	18.8
428	18.7
427	18.5
426	18.4
425	18.2
424	18.1
423	17.9
422	17.7
421	17.6
420	17.4
419	17.3
418	17.2
417	17
416	16.8
415	16.7
414	16.5
413	16.4
412	16.2
411	16.1
410	15.9
409	15.8
408	15.6
407	15.5
406	15.3
405	15.2
404	15
403	14.9
402	14.7
401	14.5
400	14.4
399	14.2
398	14
397	13.9
396	13.7
395	13.5
394	13.4
393	13.2
392	13
391	12.9
390	12.7
389	12.5
388	12.3
387	12.2
386	12
385	11.8
384	11.7
383	11.5
382	11.4
381	11.2
380	11.1
379	10.9
378	10.7
377	10.6
376	10.4
375	10.3
374	10.2
373	10
372	9.9
371	9.8
370	9.7
369	9.5
368	9.4
367	9.3
366	9.2
365	9.1
364	9
363	8.9
362	8.8
361	8.8
360	8.7
359	8.6
358	8.5
357	8.5
356	8.4
355	8.4
354	8.3
353	8.3
352	8.2
351	8.1
350	8.1
349	8.1
348	8
347	8
346	7.9
345	7.9
344	7.8
343	7.8
342	7.7
341	7.7
340	7.7
339	7.6
338	7.5
337	7.5
336	7.5
335	7.4
334	7.4
333	7.3
332	7.2
331	7.1
330	7
329	6.9
328	6.8
327	6.6
326	6.4
325	6.2
324	5.9
323	5.6
322	5.2
321	4.8
320	4.3
319	3.7
318	3.1
317	2.3
316	1.6
315	1
314	0.5
313	0.2
312	0.1
311	0.1
310	0.1
309	0.1
308	0.1
307	0.1
306	0.1
305	0.1
304	0.1
303	0.1
302	0.1
301	0.1
300	0.1
299	0.1
298	0.1
297	0.1
296	0.1
295	0.1
294	0.1
293	0.1
292	0.1
291	0.1
290	0.1
289	0.1
288	0.1
287	0.1
286	0.1
285	0.1
284	0.1
283	0.1
282	0.1
281	0.1
280	0.1
279	0.1
278	0.1
277	0.1
276	0.1
275	0.1
274	0.1
273	0
272	0
271	0
270	0
269	0
268	0
267	0
266	0
265	0
264	0
263	0
262	0
261	0
260	0
259	0
258	0
257	0
256	0
255	0
254	0
253	0
252	0
251	0
250	0
249	0
248	0
247	0
246	0
245	0
244	0
243	0
242	0
241	0
240	0
239	0
238	0
237	0
236	0
235	0
234	0
233	0
232	0
231	0
230	0
229	0
228	0
227	0
226	0
225	0
224	0
223	0
222	0
221	0
220	0
219	0
218	0
217	0
216	0
215	0
214	0
213	0
212	0
211	0
210	0
209	0
208	0
207	0
206	0
205	0
204	0
203	0
202	0
201	0
200	0
