# Supplementary material for: Effect of the lignin type on the gas/UV barrier properties of lignin–polyethyleneimine based composite films
Source: Royal Society of Chemistry journal article supplement (doi:10.1039/d5ra07628e), 2026-01-01
Supplement: d5ra07628e44.xlsx [file d5ra07628e44.xlsx]

## Sheet: Sheet1
ﾚﾎﾟｰﾄ:	16:26:53, 10/06/2025
ｻﾝﾌﾟﾙ:	20250507_PEI50(600)Soda50-100umPET
ﾌｧｲﾙ名:	20250507_PEI50(600)Soda50-100umPET.UDS
分析日時:	14:48:23, 05/07/2025
ｵﾍﾟﾚｰﾀ:	owner
ｺﾒﾝﾄ:
光度計
ﾓﾃﾞﾙ:	U-2900形分光光度計
ｼﾘｱﾙ No.:
ROM Ver.:	2J15301 05
装置条件
測定ﾓｰﾄﾞ:	波長ｽｷｬﾝ
ﾃﾞｰﾀﾓｰﾄﾞ:	%T
開始波長:	800.0 nm
終了波長:	200.0 nm
ｽｷｬﾝｽﾋﾟｰﾄﾞ:	100 nm/min
ｻﾝﾌﾟﾘﾝｸﾞ間隔:	1.0 nm
初期待ち時間:	0 s
繰り返し周期:	0.0 min
測定回数:	1
測定前ｵｰﾄｾﾞﾛ:	Off
ｽﾘｯﾄ:	1.50 nm
光源切換ﾓｰﾄﾞ:	自動切換
光源切換波長:	340.0 nm
ﾍﾞｰｽﾗｲﾝ設定:	ﾕｰｻﾞ 1
ﾚｽﾎﾟﾝｽ:	標準
D2ﾗﾝﾌﾟ:	On
WIﾗﾝﾌﾟ:	On
ｾﾙ長:	10.0 mm
ﾋﾟｰｸ検出
検出方法:	Rectangular
感度:	1
しきい値:	0.01
ﾋﾟｰｸ
ﾋﾟｰｸ No.	開始 (nm)	ﾋﾟｰｸ (nm)	終了 (nm)	高さ (%T)	ﾊﾞﾚｰ (nm)	ﾊﾞﾚｰ (%T)
1	800	358	341	0.1	341	0.1
ﾃﾞｰﾀﾘｽﾄ
nm	%T
800	80.2
799	80.2
798	80.1
797	80
796	80
795	79.9
794	79.8
793	79.8
792	79.7
791	79.6
790	79.6
789	79.5
788	79.4
787	79.4
786	79.3
785	79.2
784	79.1
783	79.1
782	79
781	78.9
780	78.9
779	78.8
778	78.7
777	78.7
776	78.6
775	78.5
774	78.4
773	78.3
772	78.3
771	78.2
770	78.1
769	78
768	78
767	77.9
766	77.8
765	77.7
764	77.6
763	77.6
762	77.5
761	77.4
760	77.3
759	77.2
758	77.1
757	77.1
756	77
755	76.9
754	76.8
753	76.7
752	76.6
751	76.5
750	76.4
749	76.4
748	76.3
747	76.2
746	76.1
745	76
744	75.9
743	75.8
742	75.7
741	75.6
740	75.5
739	75.4
738	75.3
737	75.3
736	75.2
735	75
734	74.9
733	74.8
732	74.7
731	74.6
730	74.5
729	74.4
728	74.3
727	74.2
726	74.1
725	74
724	73.8
723	73.7
722	73.6
721	73.5
720	73.4
719	73.3
718	73.2
717	73
716	72.9
715	72.8
714	72.7
713	72.6
712	72.4
711	72.3
710	72.2
709	72.1
708	71.9
707	71.8
706	71.7
705	71.6
704	71.4
703	71.3
702	71.2
701	71.1
700	70.9
699	70.8
698	70.7
697	70.6
696	70.4
695	70.3
694	70.2
693	70
692	69.9
691	69.8
690	69.6
689	69.5
688	69.4
687	69.2
686	69.1
685	68.9
684	68.8
683	68.6
682	68.5
681	68.3
680	68.2
679	68.1
678	67.9
677	67.8
676	67.6
675	67.4
674	67.3
673	67.1
672	67
671	66.8
670	66.7
669	66.5
668	66.3
667	66.2
666	66
665	65.8
664	65.7
663	65.5
662	65.3
661	65.2
660	65
659	64.8
658	64.6
657	64.5
656	64.3
655	64.1
654	63.9
653	63.7
652	63.6
651	63.4
650	63.2
649	63
648	62.8
647	62.6
646	62.4
645	62.3
644	62.1
643	61.9
642	61.7
641	61.5
640	61.3
639	61.1
638	60.9
637	60.7
636	60.5
635	60.3
634	60.1
633	59.9
632	59.7
631	59.5
630	59.3
629	59.1
628	58.8
627	58.6
626	58.4
625	58.2
624	58
623	57.8
622	57.5
621	57.3
620	57.1
619	56.9
618	56.7
617	56.4
616	56.2
615	56
614	55.7
613	55.5
612	55.3
611	55
610	54.8
609	54.6
608	54.3
607	54.1
606	53.9
605	53.6
604	53.4
603	53.1
602	52.9
601	52.6
600	52.4
599	52.1
598	51.8
597	51.6
596	51.3
595	51.1
594	50.8
593	50.6
592	50.3
591	50.1
590	49.8
589	49.5
588	49.3
587	49
586	48.7
585	48.5
584	48.2
583	47.9
582	47.7
581	47.4
580	47.1
579	46.8
578	46.6
577	46.3
576	46
575	45.7
574	45.4
573	45.1
572	44.8
571	44.5
570	44.2
569	43.9
568	43.6
567	43.3
566	43
565	42.6
564	42.3
563	42
562	41.7
561	41.4
560	41
559	40.7
558	40.4
557	40.1
556	39.7
555	39.4
554	39.1
553	38.7
552	38.4
551	38
550	37.7
549	37.3
548	37
547	36.7
546	36.3
545	36
544	35.6
543	35.3
542	34.9
541	34.6
540	34.3
539	33.9
538	33.6
537	33.3
536	32.9
535	32.6
534	32.3
533	31.9
532	31.6
531	31.2
530	30.9
529	30.6
528	30.2
527	29.9
526	29.6
525	29.3
524	28.9
523	28.6
522	28.3
521	28
520	27.6
519	27.3
518	27
517	26.7
516	26.4
515	26
514	25.7
513	25.4
512	25.1
511	24.8
510	24.5
509	24.1
508	23.8
507	23.5
506	23.2
505	22.9
504	22.6
503	22.3
502	22
501	21.7
500	21.4
499	21.1
498	20.8
497	20.5
496	20.2
495	19.9
494	19.6
493	19.3
492	19
491	18.7
490	18.4
489	18.1
488	17.8
487	17.5
486	17.2
485	17
484	16.7
483	16.4
482	16.1
481	15.8
480	15.6
479	15.3
478	15
477	14.7
476	14.5
475	14.2
474	13.9
473	13.7
472	13.4
471	13.2
470	12.9
469	12.6
468	12.4
467	12.1
466	11.9
465	11.6
464	11.4
463	11.1
462	10.9
461	10.6
460	10.4
459	10.2
458	9.9
457	9.7
456	9.5
455	9.2
454	9
453	8.7
452	8.5
451	8.3
450	8
449	7.8
448	7.6
447	7.4
446	7.1
445	6.9
444	6.7
443	6.5
442	6.3
441	6.1
440	5.8
439	5.6
438	5.4
437	5.2
436	5
435	4.8
434	4.7
433	4.5
432	4.3
431	4.1
430	3.9
429	3.8
428	3.6
427	3.5
426	3.3
425	3.2
424	3
423	2.9
422	2.8
421	2.7
420	2.5
419	2.4
418	2.3
417	2.2
416	2.1
415	2
414	1.9
413	1.8
412	1.7
411	1.6
410	1.5
409	1.4
408	1.3
407	1.3
406	1.2
405	1.1
404	1
403	1
402	0.9
401	0.9
400	0.8
399	0.7
398	0.7
397	0.6
396	0.6
395	0.5
394	0.5
393	0.5
392	0.4
391	0.4
390	0.4
389	0.3
388	0.3
387	0.3
386	0.3
385	0.3
384	0.2
383	0.2
382	0.2
381	0.2
380	0.2
379	0.2
378	0.2
377	0.2
376	0.2
375	0.2
374	0.1
373	0.1
372	0.1
371	0.1
370	0.1
369	0.1
368	0.1
367	0.1
366	0.1
365	0.1
364	0.1
363	0.1
362	0.1
361	0.1
360	0.1
359	0.1
358	0.1
357	0.1
356	0.1
355	0.1
354	0.1
353	0.1
352	0.1
351	0.1
350	0.1
349	0.1
348	0.1
347	0.1
346	0.1
345	0.1
344	0.1
343	0.1
342	0.1
341	0.1
340	0.1
339	0.1
338	0.1
337	0.1
336	0.1
335	0.1
334	0.1
333	0.1
332	0.1
331	0.1
330	0.1
329	0.1
328	0.1
327	0.1
326	0.1
325	0.1
324	0.1
323	0.1
322	0.1
321	0.1
320	0.1
319	0.1
318	0.1
317	0.1
316	0.1
315	0.1
314	0.1
313	0.1
312	0.1
311	0.1
310	0.1
309	0.1
308	0.1
307	0.1
306	0.1
305	0.1
304	0.1
303	0.1
302	0.1
301	0.1
300	0.1
299	0.1
298	0.1
297	0.1
296	0.1
295	0.1
294	0.1
293	0.1
292	0.1
291	0.1
290	0.1
289	0.1
288	0.1
287	0.1
286	0.1
285	0.1
284	0.1
283	0.1
282	0.1
281	0.1
280	0.1
279	0.1
278	0.1
277	0.1
276	0.1
275	0.1
274	0.1
273	0.1
272	0.1
271	0.1
270	0
269	0
268	0
267	0
266	0
265	0
264	0
263	0
262	0
261	0
260	0
259	0
258	0
257	0
256	0
255	0
254	0
253	0
252	0
251	0
250	0
249	0
248	0
247	0
246	0
245	0
244	0
243	0
242	0
241	0
240	0
239	0
238	0
237	0
236	0
235	0
234	0
233	0
232	0
231	0
230	0
229	0
228	0
227	0
226	0
225	0
224	0
223	0
222	0
221	0
220	0
219	0
218	0
217	0
216	0
215	0
214	0
213	0
212	0
211	0
210	0
209	0
208	0
207	0
206	0
205	0
204	0
203	0
202	0
201	0
200	0
