# Supplementary material for: Effect of the lignin type on the gas/UV barrier properties of lignin–polyethyleneimine based composite films
Source: Royal Society of Chemistry journal article supplement (doi:10.1039/d5ra07628e), 2026-01-01
Supplement: d5ra07628e45.xlsx [file d5ra07628e45.xlsx]

## Sheet: Sheet1
ﾚﾎﾟｰﾄ:	16:42:15, 10/06/2025
ｻﾝﾌﾟﾙ:	20250527_PEI83(70000)SL17-100umPET
ﾌｧｲﾙ名:	20250527_PEI83(70000)SL17-100umPET.UDS
分析日時:	09:56:28, 05/27/2025
ｵﾍﾟﾚｰﾀ:	owner
ｺﾒﾝﾄ:
光度計
ﾓﾃﾞﾙ:	U-2900形分光光度計
ｼﾘｱﾙ No.:
ROM Ver.:	2J15301 05
装置条件
測定ﾓｰﾄﾞ:	波長ｽｷｬﾝ
ﾃﾞｰﾀﾓｰﾄﾞ:	%T
開始波長:	800.0 nm
終了波長:	200.0 nm
ｽｷｬﾝｽﾋﾟｰﾄﾞ:	100 nm/min
ｻﾝﾌﾟﾘﾝｸﾞ間隔:	1.0 nm
初期待ち時間:	0 s
繰り返し周期:	0.0 min
測定回数:	1
測定前ｵｰﾄｾﾞﾛ:	Off
ｽﾘｯﾄ:	1.50 nm
光源切換ﾓｰﾄﾞ:	自動切換
光源切換波長:	340.0 nm
ﾍﾞｰｽﾗｲﾝ設定:	ﾕｰｻﾞ 1
ﾚｽﾎﾟﾝｽ:	標準
D2ﾗﾝﾌﾟ:	On
WIﾗﾝﾌﾟ:	On
ｾﾙ長:	10.0 mm
ﾋﾟｰｸ検出
検出方法:	Rectangular
感度:	1
しきい値:	0.01
ﾋﾟｰｸ
ﾋﾟｰｸ No.	開始 (nm)	ﾋﾟｰｸ (nm)	終了 (nm)	高さ (%T)	ﾊﾞﾚｰ (nm)	ﾊﾞﾚｰ (%T)
1	800	784	777	89.2	777	89.3
2	777	768	761	89.1	761	89.2
3	761	751	745	89.1	745	89.1
4	745	735	728	88.9	728	89
5	728	719	714	88.8	714	88.9
6	714	704	700	88.7	700	88.7
7	700	209	200	0	200	0
ﾃﾞｰﾀﾘｽﾄ
nm	%T
800	89.5
799	89.5
798	89.5
797	89.5
796	89.5
795	89.5
794	89.5
793	89.5
792	89.4
791	89.4
790	89.4
789	89.3
788	89.3
787	89.3
786	89.2
785	89.2
784	89.2
783	89.2
782	89.3
781	89.3
780	89.3
779	89.3
778	89.3
777	89.3
776	89.3
775	89.3
774	89.3
773	89.2
772	89.2
771	89.2
770	89.1
769	89.1
768	89.1
767	89.1
766	89.1
765	89.1
764	89.2
763	89.2
762	89.2
761	89.2
760	89.2
759	89.2
758	89.2
757	89.2
756	89.2
755	89.1
754	89.1
753	89.1
752	89.1
751	89.1
750	89.1
749	89.1
748	89.1
747	89.1
746	89.1
745	89.1
744	89.1
743	89.1
742	89.1
741	89
740	89
739	89
738	89
737	88.9
736	88.9
735	88.9
734	88.9
733	88.9
732	88.9
731	89
730	89
729	89
728	89
727	89
726	89
725	88.9
724	88.9
723	88.9
722	88.8
721	88.8
720	88.8
719	88.8
718	88.8
717	88.9
716	88.9
715	88.9
714	88.9
713	88.9
712	88.9
711	88.8
710	88.8
709	88.8
708	88.8
707	88.7
706	88.7
705	88.7
704	88.7
703	88.7
702	88.7
701	88.7
700	88.7
699	88.7
698	88.7
697	88.7
696	88.7
695	88.7
694	88.6
693	88.6
692	88.6
691	88.6
690	88.6
689	88.6
688	88.6
687	88.6
686	88.6
685	88.6
684	88.6
683	88.6
682	88.5
681	88.5
680	88.5
679	88.4
678	88.4
677	88.4
676	88.4
675	88.4
674	88.4
673	88.4
672	88.4
671	88.4
670	88.4
669	88.4
668	88.3
667	88.3
666	88.3
665	88.3
664	88.3
663	88.3
662	88.3
661	88.3
660	88.3
659	88.2
658	88.2
657	88.2
656	88.2
655	88.1
654	88.1
653	88.1
652	88.1
651	88.1
650	88.1
649	88.1
648	88.1
647	88.1
646	88
645	88
644	88
643	87.9
642	87.9
641	87.9
640	87.9
639	87.9
638	87.9
637	87.8
636	87.8
635	87.8
634	87.8
633	87.8
632	87.7
631	87.7
630	87.7
629	87.6
628	87.6
627	87.6
626	87.6
625	87.6
624	87.6
623	87.5
622	87.5
621	87.5
620	87.4
619	87.4
618	87.4
617	87.4
616	87.3
615	87.3
614	87.3
613	87.3
612	87.2
611	87.2
610	87.2
609	87.1
608	87.1
607	87.1
606	87
605	87
604	87
603	87
602	86.9
601	86.9
600	86.8
599	86.8
598	86.8
597	86.7
596	86.7
595	86.7
594	86.6
593	86.6
592	86.6
591	86.5
590	86.5
589	86.5
588	86.4
587	86.4
586	86.4
585	86.3
584	86.3
583	86.2
582	86.2
581	86.2
580	86.1
579	86.1
578	86.1
577	86.1
576	86
575	86
574	86
573	85.9
572	85.9
571	85.9
570	85.8
569	85.8
568	85.8
567	85.7
566	85.7
565	85.7
564	85.6
563	85.6
562	85.6
561	85.6
560	85.5
559	85.5
558	85.5
557	85.4
556	85.4
555	85.4
554	85.3
553	85.3
552	85.3
551	85.2
550	85.2
549	85.2
548	85.1
547	85.1
546	85.1
545	85
544	85
543	84.9
542	84.9
541	84.9
540	84.8
539	84.8
538	84.7
537	84.7
536	84.6
535	84.6
534	84.6
533	84.5
532	84.5
531	84.4
530	84.3
529	84.3
528	84.2
527	84.2
526	84.2
525	84.1
524	84.1
523	84
522	83.9
521	83.9
520	83.8
519	83.8
518	83.7
517	83.7
516	83.6
515	83.6
514	83.5
513	83.4
512	83.4
511	83.4
510	83.3
509	83.3
508	83.2
507	83.1
506	83.1
505	83
504	83
503	83
502	82.9
501	82.8
500	82.8
499	82.7
498	82.7
497	82.6
496	82.6
495	82.5
494	82.5
493	82.4
492	82.4
491	82.3
490	82.3
489	82.2
488	82.2
487	82.1
486	82
485	82
484	81.9
483	81.9
482	81.8
481	81.7
480	81.6
479	81.6
478	81.5
477	81.4
476	81.4
475	81.3
474	81.2
473	81.1
472	81
471	81
470	80.9
469	80.8
468	80.7
467	80.6
466	80.5
465	80.4
464	80.4
463	80.3
462	80.2
461	80.1
460	80
459	79.9
458	79.8
457	79.7
456	79.6
455	79.5
454	79.4
453	79.3
452	79.2
451	79.1
450	79
449	78.8
448	78.7
447	78.6
446	78.5
445	78.4
444	78.2
443	78.1
442	78
441	77.9
440	77.7
439	77.6
438	77.5
437	77.3
436	77.2
435	77.1
434	76.9
433	76.8
432	76.6
431	76.5
430	76.3
429	76.2
428	76
427	75.8
426	75.7
425	75.5
424	75.3
423	75.1
422	75
421	74.8
420	74.6
419	74.4
418	74.2
417	74
416	73.8
415	73.6
414	73.3
413	73.1
412	72.9
411	72.6
410	72.4
409	72.1
408	71.9
407	71.6
406	71.3
405	71.1
404	70.8
403	70.5
402	70.1
401	69.8
400	69.5
399	69.2
398	68.8
397	68.5
396	68.1
395	67.7
394	67.3
393	66.9
392	66.5
391	66.1
390	65.6
389	65.2
388	64.7
387	64.2
386	63.7
385	63.2
384	62.7
383	62.2
382	61.6
381	61
380	60.5
379	59.9
378	59.2
377	58.4
376	57.8
375	57.1
374	56.3
373	55.6
372	54.8
371	54
370	53.1
369	52.2
368	51.3
367	50.4
366	49.4
365	48.5
364	47.5
363	46.5
362	45.4
361	44.4
360	43.4
359	42.4
358	41.3
357	40.3
356	39.3
355	38.3
354	37.3
353	36.2
352	35.2
351	34.3
350	33.3
349	32.4
348	31.5
347	30.6
346	29.7
345	28.9
344	28.1
343	27.3
342	26.6
341	25.9
340	25.3
339	24.8
338	24.2
337	23.6
336	23
335	22.4
334	21.8
333	21.3
332	20.7
331	20.1
330	19.5
329	18.8
328	18.1
327	17.3
326	16.5
325	15.6
324	14.6
323	13.6
322	12.5
321	11.2
320	9.8
319	8.2
318	6.5
317	4.7
316	3.1
315	1.8
314	0.9
313	0.4
312	0.1
311	0.1
310	0.1
309	0
308	0
307	0
306	0
305	0
304	0
303	0
302	0
301	0
300	0
299	0
298	0
297	0
296	0
295	0
294	0
293	0
292	0
291	0
290	0
289	0
288	0
287	0
286	0
285	0
284	0
283	0
282	0
281	0
280	0
279	0
278	0
277	0
276	0
275	0
274	0
273	0
272	0
271	0
270	0
269	0
268	0
267	0
266	0
265	0
264	0
263	0
262	0
261	0
260	0
259	0
258	0
257	0
256	0
255	0
254	0
253	0
252	0
251	0
250	0
249	0
248	0
247	0
246	0
245	0
244	0
243	0
242	0
241	0
240	0
239	0
238	0
237	0
236	0
235	0
234	0
233	0
232	0
231	0
230	0
229	0
228	0
227	0
226	0
225	0
224	0
223	0
222	0
221	0
220	0
219	0
218	0
217	0
216	0
215	0
214	0
213	0
212	0
211	0
210	0
209	0
208	0
207	0
206	0
205	0
204	0
203	0
202	0
201	0
200	0
