# Supplementary material for: Effect of the lignin type on the gas/UV barrier properties of lignin–polyethyleneimine based composite films
Source: Royal Society of Chemistry journal article supplement (doi:10.1039/d5ra07628e), 2026-01-01
Supplement: d5ra07628e46.xlsx [file d5ra07628e46.xlsx]

## Sheet: Sheet1
ﾚﾎﾟｰﾄ:	16:29:34, 10/06/2025
ｻﾝﾌﾟﾙ:	20250528_PEI50(70000)Soda50-100umPET
ﾌｧｲﾙ名:	20250528_PEI50(70000)Soda50-100umPET.UDS
分析日時:	10:32:21, 05/28/2025
ｵﾍﾟﾚｰﾀ:	owner
ｺﾒﾝﾄ:
光度計
ﾓﾃﾞﾙ:	U-2900形分光光度計
ｼﾘｱﾙ No.:
ROM Ver.:	2J15301 05
装置条件
測定ﾓｰﾄﾞ:	波長ｽｷｬﾝ
ﾃﾞｰﾀﾓｰﾄﾞ:	%T
開始波長:	800.0 nm
終了波長:	200.0 nm
ｽｷｬﾝｽﾋﾟｰﾄﾞ:	100 nm/min
ｻﾝﾌﾟﾘﾝｸﾞ間隔:	1.0 nm
初期待ち時間:	0 s
繰り返し周期:	0.0 min
測定回数:	1
測定前ｵｰﾄｾﾞﾛ:	Off
ｽﾘｯﾄ:	1.50 nm
光源切換ﾓｰﾄﾞ:	自動切換
光源切換波長:	340.0 nm
ﾍﾞｰｽﾗｲﾝ設定:	ﾕｰｻﾞ 1
ﾚｽﾎﾟﾝｽ:	標準
D2ﾗﾝﾌﾟ:	On
WIﾗﾝﾌﾟ:	On
ｾﾙ長:	10.0 mm
ﾋﾟｰｸ検出
検出方法:	Rectangular
感度:	1
しきい値:	0.01
ﾋﾟｰｸ
ﾋﾟｰｸ No.	開始 (nm)	ﾋﾟｰｸ (nm)	終了 (nm)	高さ (%T)	ﾊﾞﾚｰ (nm)	ﾊﾞﾚｰ (%T)
1	800	354	342	0.1	342	0.1
2	342	277	269	0	269	0.1
ﾃﾞｰﾀﾘｽﾄ
nm	%T
800	83.1
799	83.1
798	83
797	82.9
796	82.8
795	82.7
794	82.7
793	82.6
792	82.5
791	82.4
790	82.4
789	82.3
788	82.2
787	82.1
786	82
785	82
784	81.9
783	81.8
782	81.7
781	81.6
780	81.5
779	81.5
778	81.4
777	81.3
776	81.2
775	81.1
774	81
773	80.9
772	80.9
771	80.8
770	80.7
769	80.6
768	80.5
767	80.4
766	80.3
765	80.2
764	80.1
763	80
762	79.9
761	79.8
760	79.8
759	79.7
758	79.6
757	79.5
756	79.4
755	79.3
754	79.2
753	79.1
752	79
751	78.9
750	78.8
749	78.7
748	78.6
747	78.5
746	78.5
745	78.4
744	78.3
743	78.3
742	78.2
741	78.1
740	78.1
739	78
738	77.9
737	77.8
736	77.7
735	77.6
734	77.5
733	77.4
732	77.3
731	77.2
730	77.1
729	77
728	76.8
727	76.7
726	76.6
725	76.5
724	76.4
723	76.3
722	76.2
721	76.1
720	75.9
719	75.8
718	75.7
717	75.6
716	75.5
715	75.4
714	75.2
713	75.1
712	75
711	74.8
710	74.7
709	74.6
708	74.5
707	74.3
706	74.2
705	74.1
704	74
703	73.8
702	73.7
701	73.6
700	73.4
699	73.3
698	73.2
697	73
696	72.9
695	72.7
694	72.6
693	72.4
692	72.3
691	72.2
690	72
689	71.9
688	71.7
687	71.6
686	71.4
685	71.3
684	71.1
683	71
682	70.8
681	70.7
680	70.5
679	70.3
678	70.2
677	70
676	69.9
675	69.7
674	69.6
673	69.4
672	69.2
671	69.1
670	68.9
669	68.7
668	68.6
667	68.4
666	68.2
665	68
664	67.9
663	67.7
662	67.5
661	67.4
660	67.2
659	67
658	66.9
657	66.7
656	66.5
655	66.3
654	66.2
653	66
652	65.8
651	65.6
650	65.4
649	65.2
648	65.1
647	64.9
646	64.7
645	64.5
644	64.3
643	64.1
642	64
641	63.8
640	63.6
639	63.4
638	63.2
637	63
636	62.8
635	62.6
634	62.4
633	62.2
632	62
631	61.8
630	61.6
629	61.4
628	61.1
627	60.9
626	60.7
625	60.5
624	60.3
623	60
622	59.8
621	59.6
620	59.4
619	59.2
618	58.9
617	58.7
616	58.5
615	58.2
614	58
613	57.7
612	57.5
611	57.3
610	57
609	56.8
608	56.5
607	56.3
606	56
605	55.8
604	55.5
603	55.3
602	55
601	54.8
600	54.5
599	54.2
598	54
597	53.7
596	53.5
595	53.2
594	52.9
593	52.7
592	52.4
591	52.2
590	51.9
589	51.7
588	51.4
587	51.2
586	50.9
585	50.7
584	50.4
583	50.2
582	49.9
581	49.7
580	49.4
579	49.1
578	48.8
577	48.6
576	48.3
575	48
574	47.7
573	47.4
572	47.1
571	46.8
570	46.5
569	46.2
568	45.9
567	45.6
566	45.3
565	45
564	44.7
563	44.3
562	44
561	43.7
560	43.4
559	43.1
558	42.7
557	42.4
556	42.1
555	41.7
554	41.4
553	41
552	40.7
551	40.4
550	40
549	39.7
548	39.3
547	39
546	38.6
545	38.3
544	37.9
543	37.6
542	37.2
541	36.9
540	36.6
539	36.2
538	35.9
537	35.5
536	35.2
535	34.9
534	34.5
533	34.2
532	33.9
531	33.5
530	33.2
529	32.9
528	32.5
527	32.2
526	31.9
525	31.5
524	31.2
523	30.9
522	30.5
521	30.2
520	29.9
519	29.5
518	29.2
517	28.9
516	28.5
515	28.2
514	27.9
513	27.6
512	27.2
511	26.9
510	26.6
509	26.3
508	25.9
507	25.6
506	25.3
505	25
504	24.6
503	24.3
502	24
501	23.7
500	23.4
499	23.1
498	22.8
497	22.4
496	22.1
495	21.8
494	21.5
493	21.2
492	20.9
491	20.6
490	20.3
489	20
488	19.7
487	19.3
486	19
485	18.7
484	18.4
483	18.2
482	17.9
481	17.6
480	17.3
479	17
478	16.7
477	16.4
476	16.1
475	15.8
474	15.6
473	15.3
472	15
471	14.7
470	14.4
469	14.2
468	13.9
467	13.6
466	13.3
465	13.1
464	12.8
463	12.5
462	12.3
461	12
460	11.8
459	11.5
458	11.2
457	11
456	10.7
455	10.5
454	10.2
453	10
452	9.7
451	9.5
450	9.2
449	9
448	8.7
447	8.4
446	8.2
445	7.9
444	7.7
443	7.5
442	7.2
441	7
440	6.7
439	6.5
438	6.3
437	6.1
436	5.8
435	5.6
434	5.4
433	5.2
432	5
431	4.8
430	4.6
429	4.4
428	4.3
427	4.1
426	3.9
425	3.7
424	3.6
423	3.4
422	3.3
421	3.1
420	3
419	2.9
418	2.7
417	2.6
416	2.5
415	2.4
414	2.2
413	2.1
412	2
411	1.9
410	1.8
409	1.7
408	1.6
407	1.5
406	1.4
405	1.3
404	1.2
403	1.2
402	1.1
401	1
400	0.9
399	0.9
398	0.8
397	0.8
396	0.7
395	0.6
394	0.6
393	0.5
392	0.5
391	0.5
390	0.4
389	0.4
388	0.4
387	0.3
386	0.3
385	0.3
384	0.3
383	0.2
382	0.2
381	0.2
380	0.2
379	0.2
378	0.2
377	0.2
376	0.1
375	0.1
374	0.1
373	0.1
372	0.1
371	0.1
370	0.1
369	0.1
368	0.1
367	0.1
366	0.1
365	0.1
364	0.1
363	0.1
362	0.1
361	0.1
360	0.1
359	0.1
358	0.1
357	0.1
356	0.1
355	0.1
354	0.1
353	0.1
352	0.1
351	0.1
350	0.1
349	0.1
348	0.1
347	0.1
346	0.1
345	0.1
344	0.1
343	0.1
342	0.1
341	0.1
340	0.1
339	0.1
338	0.1
337	0.1
336	0.1
335	0.1
334	0.1
333	0.1
332	0.1
331	0.1
330	0.1
329	0.1
328	0.1
327	0.1
326	0.1
325	0.1
324	0.1
323	0.1
322	0.1
321	0.1
320	0.1
319	0.1
318	0
317	0
316	0
315	0
314	0
313	0
312	0
311	0
310	0
309	0
308	0
307	0
306	0
305	0
304	0
303	0
302	0
301	0
300	0
299	0
298	0
297	0
296	0
295	0
294	0
293	0
292	0
291	0
290	0
289	0
288	0
287	0
286	0
285	0
284	0
283	0
282	0
281	0
280	0
279	0
278	0
277	0
276	0
275	0
274	0
273	0
272	0
271	0
270	0
269	0.1
268	0
267	0
266	0
265	0
264	0
263	0
262	0
261	0
260	0
259	0
258	0
257	0
256	0
255	0
254	0
253	0
252	0
251	0
250	0
249	0
248	0
247	0
246	0
245	0
244	0
243	0
242	0
241	0
240	0
239	0
238	0
237	0
236	0
235	0
234	0
233	0
232	0
231	0
230	0
229	0
228	0
227	0
226	0
225	0
224	0
223	0
222	0
221	0
220	0
219	0
218	0
217	0
216	0
215	0
214	0
213	0
212	0
211	0
210	0
209	0
208	0
207	0
206	0
205	0
204	0
203	0
202	0
201	0
200	0
