# Supplementary material for: Effect of the lignin type on the gas/UV barrier properties of lignin–polyethyleneimine based composite films
Source: Royal Society of Chemistry journal article supplement (doi:10.1039/d5ra07628e), 2026-01-01
Supplement: d5ra07628e47.xlsx [file d5ra07628e47.xlsx]

## Sheet: Sheet1
ﾚﾎﾟｰﾄ:	23:40:50, 05/06/2010
指定波長ﾃﾞｰﾀﾃｰﾌﾞﾙ
ｻﾝﾌﾟﾙ名	800.0nm(%T)	750.0nm(%T)	700.0nm(%T)	650.0nm(%T)	600.0nm(%T)	550.0nm(%T)	500.0nm(%T)	450.0nm(%T)	400.0nm(%T)	350.0nm(%T)	300.0nm(%T)	250.0nm(%T)
LSPEI5onPET(10000)_240125	89.5	89	88.8	88	86.8	84.4	79.6	70.8	50.5	12.6	0	0
ｻﾝﾌﾟﾙ:	LSPEI5onPET(10000)_240125
ﾌｧｲﾙ名:	LS5PEI5onPET50.UDS
分析日時:	23:02:12, 05/06/2010
ｵﾍﾟﾚｰﾀ:	Suzuki
ｺﾒﾝﾄ:
光度計
ﾓﾃﾞﾙ:	U-2910形分光光度計
ｼﾘｱﾙ No.:	2225-013
ROM Ver.:	2J15301 05
装置条件
測定ﾓｰﾄﾞ:	波長ｽｷｬﾝ
ﾃﾞｰﾀﾓｰﾄﾞ:	%T
開始波長:	800.0 nm
終了波長:	200.0 nm
ｽｷｬﾝｽﾋﾟｰﾄﾞ:	100 nm/min
ｻﾝﾌﾟﾘﾝｸﾞ間隔:	1.0 nm
初期待ち時間:	0 s
繰り返し周期:	0.0 min
測定回数:	1
測定前ｵｰﾄｾﾞﾛ:	Off
ｽﾘｯﾄ:	1.50 nm
光源切換ﾓｰﾄﾞ:	自動切換
光源切換波長:	325.0 nm
ﾍﾞｰｽﾗｲﾝ設定:	ﾕｰｻﾞ 1
ﾚｽﾎﾟﾝｽ:	標準
D2ﾗﾝﾌﾟ:	On
WIﾗﾝﾌﾟ:	On
ｾﾙ長:	1.0 mm
ﾃﾞｰﾀﾘｽﾄ
nm	%T
800	89.5
799	89.5
798	89.5
797	89.4
796	89.4
795	89.4
794	89.4
793	89.3
792	89.3
791	89.3
790	89.3
789	89.2
788	89.2
787	89.2
786	89.2
785	89.2
784	89.3
783	89.3
782	89.3
781	89.3
780	89.3
779	89.3
778	89.3
777	89.3
776	89.3
775	89.3
774	89.2
773	89.2
772	89.2
771	89.2
770	89.1
769	89.1
768	89.1
767	89.1
766	89.1
765	89.1
764	89.1
763	89.2
762	89.1
761	89.2
760	89.2
759	89.2
758	89.2
757	89.2
756	89.2
755	89.2
754	89.1
753	89.1
752	89.1
751	89.1
750	89
749	89.1
748	89
747	89
746	89.1
745	89.1
744	89.1
743	89.1
742	89.1
741	89.2
740	89.2
739	89.2
738	89.2
737	89.2
736	89.2
735	89.2
734	89.1
733	89.1
732	89.1
731	89.1
730	89
729	89
728	89
727	89
726	89
725	89
724	89.1
723	89.1
722	89.1
721	89.1
720	89.1
719	89.1
718	89.1
717	89
716	89
715	88.9
714	88.9
713	88.9
712	88.8
711	88.8
710	88.8
709	88.8
708	88.8
707	88.9
706	88.8
705	88.8
704	88.9
703	88.9
702	88.8
701	88.8
700	88.8
699	88.8
698	88.7
697	88.7
696	88.6
695	88.6
694	88.6
693	88.6
692	88.5
691	88.5
690	88.6
689	88.6
688	88.6
687	88.6
686	88.6
685	88.6
684	88.6
683	88.5
682	88.5
681	88.4
680	88.4
679	88.4
678	88.3
677	88.3
676	88.3
675	88.3
674	88.3
673	88.3
672	88.3
671	88.4
670	88.4
669	88.3
668	88.3
667	88.3
666	88.3
665	88.2
664	88.2
663	88.1
662	88.1
661	88.1
660	88.1
659	88.1
658	88.1
657	88.1
656	88.1
655	88.2
654	88.2
653	88.2
652	88.1
651	88.1
650	88
649	88
648	87.9
647	87.9
646	87.9
645	87.9
644	87.9
643	87.9
642	87.9
641	87.9
640	88
639	87.9
638	87.9
637	87.9
636	87.8
635	87.8
634	87.7
633	87.6
632	87.6
631	87.6
630	87.6
629	87.6
628	87.6
627	87.6
626	87.6
625	87.6
624	87.6
623	87.5
622	87.4
621	87.4
620	87.3
619	87.2
618	87.2
617	87.2
616	87.1
615	87.1
614	87.2
613	87.2
612	87.2
611	87.1
610	87.1
609	87
608	86.9
607	86.8
606	86.8
605	86.7
604	86.7
603	86.7
602	86.7
601	86.7
600	86.8
599	86.8
598	86.8
597	86.8
596	86.7
595	86.7
594	86.6
593	86.6
592	86.6
591	86.5
590	86.5
589	86.5
588	86.5
587	86.4
586	86.4
585	86.4
584	86.3
583	86.3
582	86.2
581	86.2
580	86.2
579	86.1
578	86.1
577	86.1
576	86
575	86
574	85.9
573	85.9
572	85.8
571	85.7
570	85.7
569	85.6
568	85.6
567	85.5
566	85.5
565	85.4
564	85.4
563	85.3
562	85.2
561	85.2
560	85.1
559	85
558	84.9
557	84.8
556	84.8
555	84.7
554	84.7
553	84.6
552	84.5
551	84.4
550	84.4
549	84.3
548	84.2
547	84.1
546	84
545	84
544	83.9
543	83.8
542	83.8
541	83.7
540	83.6
539	83.5
538	83.4
537	83.3
536	83.2
535	83.2
534	83.1
533	83
532	83
531	82.9
530	82.8
529	82.6
528	82.5
527	82.4
526	82.4
525	82.3
524	82.2
523	82.1
522	82
521	81.9
520	81.8
519	81.7
518	81.6
517	81.5
516	81.4
515	81.3
514	81.2
513	81.1
512	81
511	80.9
510	80.7
509	80.6
508	80.5
507	80.4
506	80.3
505	80.2
504	80.1
503	80
502	79.8
501	79.7
500	79.6
499	79.4
498	79.3
497	79.2
496	79.1
495	79
494	78.9
493	78.7
492	78.6
491	78.4
490	78.3
489	78.2
488	78.1
487	77.9
486	77.8
485	77.6
484	77.4
483	77.3
482	77.1
481	77
480	76.9
479	76.7
478	76.6
477	76.4
476	76.2
475	76.1
474	75.9
473	75.7
472	75.6
471	75.4
470	75.2
469	75
468	74.8
467	74.6
466	74.4
465	74.2
464	74.1
463	73.8
462	73.6
461	73.4
460	73.2
459	72.9
458	72.7
457	72.5
456	72.3
455	72
454	71.8
453	71.5
452	71.3
451	71
450	70.8
449	70.5
448	70.2
447	70
446	69.7
445	69.4
444	69.1
443	68.9
442	68.6
441	68.3
440	68
439	67.7
438	67.4
437	67.1
436	66.7
435	66.4
434	66
433	65.7
432	65.3
431	65
430	64.6
429	64.2
428	63.9
427	63.5
426	63
425	62.7
424	62.3
423	61.8
422	61.4
421	61
420	60.6
419	60.1
418	59.7
417	59.3
416	58.8
415	58.3
414	57.8
413	57.4
412	56.9
411	56.4
410	55.9
409	55.4
408	54.9
407	54.4
406	53.8
405	53.3
404	52.7
403	52.2
402	51.6
401	51.1
400	50.5
399	49.9
398	49.3
397	48.7
396	48.1
395	47.4
394	46.8
393	46.1
392	45.5
391	44.8
390	44.1
389	43.5
388	42.8
387	42
386	41.3
385	40.6
384	39.8
383	39
382	38.2
381	37.4
380	36.5
379	35.7
378	34.7
377	33.7
376	32.8
375	31.8
374	30.8
373	29.9
372	28.9
371	28
370	27
369	26.1
368	25.2
367	24.3
366	23.4
365	22.6
364	21.8
363	21
362	20.3
361	19.5
360	18.8
359	18.1
358	17.5
357	16.8
356	16.2
355	15.5
354	14.9
353	14.3
352	13.7
351	13.2
350	12.6
349	12
348	11.5
347	11
346	10.5
345	10
344	9.5
343	9
342	8.5
341	8.1
340	7.7
339	7.3
338	6.9
337	6.6
336	6.2
335	5.9
334	5.6
333	5.3
332	5
331	4.7
330	4.4
329	4.2
328	3.9
327	3.6
326	3.3
325	3.1
324	2.8
323	2.6
322	2.3
321	2
320	1.7
319	1.4
318	1
317	0.7
316	0.5
315	0.2
314	0.1
313	0
312	0
311	0
310	0
309	0
308	0
307	0
306	0
305	0
304	0
303	0
302	0
301	0
300	0
299	0
298	0
297	0
296	0
295	0
294	0
293	0
292	0
291	0
290	0
289	0
288	0
287	0
286	0
285	0
284	0
283	0
282	0
281	0
280	0
279	0
278	0
277	0
276	0
275	0
274	0
273	0
272	0
271	0
270	0
269	0
268	0
267	0
266	0
265	0
264	0
263	0
262	0
261	0
260	0
259	0
258	0
257	0
256	0
255	0
254	0
253	0
252	0
251	0
250	0
249	0
248	0
247	0
246	0
245	0
244	0
243	0
242	0
241	0
240	0
239	0
238	0
237	0
236	0
235	0
234	0
233	0
232	0
231	0
230	0
229	0
228	0
227	0
226	0
225	0
224	0
223	0
222	0
221	0
220	0
219	0
218	0
217	0
216	0
215	0
214	0
213	0
212	0
211	0
210	0
209	0
208	0
207	0
206	0
205	0
204	0
203	0
202	0
201	0
200	0
