# Supplementary material for: Effect of the lignin type on the gas/UV barrier properties of lignin–polyethyleneimine based composite films
Source: Royal Society of Chemistry journal article supplement (doi:10.1039/d5ra07628e), 2026-01-01
Supplement: d5ra07628e48.xlsx [file d5ra07628e48.xlsx]

## Sheet: Sheet1
ﾚﾎﾟｰﾄ:	22:12:18, 04/21/2010
指定波長ﾃﾞｰﾀﾃｰﾌﾞﾙ
ｻﾝﾌﾟﾙ名	800.0nm(%T)	750.0nm(%T)	700.0nm(%T)	650.0nm(%T)	600.0nm(%T)	550.0nm(%T)	500.0nm(%T)	450.0nm(%T)	400.0nm(%T)	350.0nm(%T)	300.0nm(%T)	250.0nm(%T)
SL50PEI50onPET_50	88.9	88.3	87.3	85.5	82.1	78.2	72.3	63.7	43.9	4.7	0	0
ｻﾝﾌﾟﾙ:	SL50PEI50onPET_50
ﾌｧｲﾙ名:	SL5PEI5omPET50.UDS
分析日時:	01:14:37, 04/21/2010
ｵﾍﾟﾚｰﾀ:	Suzuki
ｺﾒﾝﾄ:
光度計
ﾓﾃﾞﾙ:	U-2910形分光光度計
ｼﾘｱﾙ No.:	2225-013
ROM Ver.:	2J15301 05
装置条件
測定ﾓｰﾄﾞ:	波長ｽｷｬﾝ
ﾃﾞｰﾀﾓｰﾄﾞ:	%T
開始波長:	800.0 nm
終了波長:	200.0 nm
ｽｷｬﾝｽﾋﾟｰﾄﾞ:	100 nm/min
ｻﾝﾌﾟﾘﾝｸﾞ間隔:	1.0 nm
初期待ち時間:	0 s
繰り返し周期:	0.0 min
測定回数:	1
測定前ｵｰﾄｾﾞﾛ:	Off
ｽﾘｯﾄ:	1.50 nm
光源切換ﾓｰﾄﾞ:	自動切換
光源切換波長:	325.0 nm
ﾍﾞｰｽﾗｲﾝ設定:	ﾕｰｻﾞ 1
ﾚｽﾎﾟﾝｽ:	標準
D2ﾗﾝﾌﾟ:	On
WIﾗﾝﾌﾟ:	On
ｾﾙ長:	1.0 mm
ﾃﾞｰﾀﾘｽﾄ
nm	%T
800	88.9
799	88.9
798	88.8
797	88.8
796	88.8
795	88.8
794	88.8
793	88.8
792	88.8
791	88.8
790	88.7
789	88.7
788	88.7
787	88.7
786	88.7
785	88.7
784	88.7
783	88.6
782	88.6
781	88.6
780	88.6
779	88.6
778	88.6
777	88.6
776	88.6
775	88.6
774	88.6
773	88.6
772	88.5
771	88.5
770	88.5
769	88.5
768	88.5
767	88.5
766	88.5
765	88.5
764	88.4
763	88.4
762	88.4
761	88.4
760	88.4
759	88.4
758	88.4
757	88.4
756	88.4
755	88.4
754	88.4
753	88.3
752	88.3
751	88.3
750	88.3
749	88.3
748	88.3
747	88.3
746	88.3
745	88.3
744	88.3
743	88.3
742	88.3
741	88.3
740	88.3
739	88.2
738	88.2
737	88.2
736	88.2
735	88.2
734	88.2
733	88.2
732	88.1
731	88.1
730	88.1
729	88.1
728	88
727	88
726	88
725	88
724	88
723	87.9
722	87.9
721	87.9
720	87.9
719	87.8
718	87.8
717	87.8
716	87.8
715	87.7
714	87.7
713	87.7
712	87.7
711	87.6
710	87.6
709	87.6
708	87.5
707	87.5
706	87.5
705	87.4
704	87.4
703	87.4
702	87.3
701	87.3
700	87.3
699	87.2
698	87.2
697	87.2
696	87.1
695	87.1
694	87.1
693	87
692	87
691	87
690	86.9
689	86.9
688	86.9
687	86.8
686	86.8
685	86.8
684	86.7
683	86.7
682	86.7
681	86.6
680	86.6
679	86.6
678	86.5
677	86.5
676	86.5
675	86.4
674	86.4
673	86.4
672	86.3
671	86.3
670	86.3
669	86.2
668	86.2
667	86.2
666	86.1
665	86.1
664	86.1
663	86
662	86
661	85.9
660	85.9
659	85.9
658	85.8
657	85.8
656	85.7
655	85.7
654	85.7
653	85.6
652	85.6
651	85.5
650	85.5
649	85.4
648	85.4
647	85.3
646	85.3
645	85.2
644	85.2
643	85.1
642	85.1
641	85
640	85
639	84.9
638	84.8
637	84.8
636	84.7
635	84.6
634	84.6
633	84.5
632	84.4
631	84.4
630	84.3
629	84.2
628	84.2
627	84.1
626	84
625	83.9
624	83.9
623	83.8
622	83.7
621	83.7
620	83.6
619	83.5
618	83.4
617	83.4
616	83.3
615	83.2
614	83.1
613	83.1
612	83
611	82.9
610	82.8
609	82.7
608	82.7
607	82.6
606	82.5
605	82.5
604	82.4
603	82.3
602	82.3
601	82.2
600	82.1
599	82.1
598	82
597	81.9
596	81.8
595	81.8
594	81.7
593	81.6
592	81.6
591	81.5
590	81.4
589	81.3
588	81.3
587	81.2
586	81.1
585	81.1
584	81
583	80.9
582	80.8
581	80.7
580	80.7
579	80.6
578	80.5
577	80.4
576	80.3
575	80.3
574	80.2
573	80.1
572	80
571	79.9
570	79.8
569	79.8
568	79.7
567	79.6
566	79.5
565	79.4
564	79.4
563	79.3
562	79.2
561	79.1
560	79
559	79
558	78.9
557	78.8
556	78.7
555	78.6
554	78.6
553	78.5
552	78.4
551	78.3
550	78.2
549	78.1
548	78
547	78
546	77.9
545	77.8
544	77.7
543	77.6
542	77.5
541	77.4
540	77.3
539	77.1
538	77
537	76.9
536	76.8
535	76.7
534	76.5
533	76.4
532	76.3
531	76.1
530	76
529	75.9
528	75.7
527	75.6
526	75.5
525	75.3
524	75.2
523	75
522	74.9
521	74.8
520	74.6
519	74.5
518	74.4
517	74.3
516	74.2
515	74
514	73.9
513	73.8
512	73.7
511	73.6
510	73.5
509	73.3
508	73.2
507	73.1
506	73
505	72.9
504	72.8
503	72.7
502	72.6
501	72.4
500	72.3
499	72.2
498	72.1
497	72
496	71.9
495	71.7
494	71.6
493	71.5
492	71.4
491	71.2
490	71.1
489	71
488	70.8
487	70.7
486	70.5
485	70.4
484	70.2
483	70.1
482	70
481	69.8
480	69.7
479	69.6
478	69.4
477	69.3
476	69.1
475	69
474	68.8
473	68.6
472	68.5
471	68.3
470	68.1
469	67.9
468	67.7
467	67.5
466	67.3
465	67.1
464	66.9
463	66.7
462	66.5
461	66.3
460	66.1
459	65.9
458	65.6
457	65.4
456	65.2
455	64.9
454	64.7
453	64.5
452	64.2
451	64
450	63.7
449	63.5
448	63.2
447	63
446	62.7
445	62.4
444	62.2
443	61.9
442	61.6
441	61.3
440	61
439	60.7
438	60.4
437	60.1
436	59.8
435	59.5
434	59.2
433	58.9
432	58.5
431	58.2
430	57.9
429	57.5
428	57.2
427	56.8
426	56.4
425	56
424	55.7
423	55.3
422	54.9
421	54.5
420	54.1
419	53.6
418	53.2
417	52.8
416	52.3
415	51.9
414	51.4
413	50.9
412	50.4
411	50
410	49.5
409	49
408	48.4
407	47.9
406	47.4
405	46.8
404	46.2
403	45.7
402	45.1
401	44.5
400	43.9
399	43.2
398	42.6
397	41.9
396	41.3
395	40.6
394	39.9
393	39.2
392	38.4
391	37.7
390	36.9
389	36.2
388	35.4
387	34.6
386	33.8
385	32.9
384	32.1
383	31.3
382	30.4
381	29.5
380	28.7
379	27.8
378	26.8
377	25.8
376	24.9
375	24
374	23.1
373	22.1
372	21.2
371	20.3
370	19.3
369	18.4
368	17.5
367	16.5
366	15.6
365	14.7
364	13.8
363	13
362	12.1
361	11.3
360	10.6
359	9.8
358	9.1
357	8.4
356	7.8
355	7.2
354	6.6
353	6.1
352	5.6
351	5.1
350	4.7
349	4.3
348	3.9
347	3.6
346	3.3
345	3
344	2.7
343	2.5
342	2.3
341	2.1
340	1.9
339	1.8
338	1.6
337	1.5
336	1.4
335	1.3
334	1.2
333	1.1
332	1
331	0.9
330	0.8
329	0.7
328	0.6
327	0.6
326	0.5
325	0.4
324	0.4
323	0.4
322	0.3
321	0.3
320	0.2
319	0.2
318	0.1
317	0.1
316	0
315	0
314	0
313	0
312	0
311	0
310	0
309	0
308	0
307	0
306	0
305	0
304	0
303	0
302	0
301	0
300	0
299	0
298	0
297	0
296	0
295	0
294	0
293	0
292	0
291	0
290	0
289	0
288	0
287	0
286	0
285	0
284	0
283	0
282	0
281	0
280	0
279	0
278	0
277	0
276	0
275	0
274	0
273	0
272	0
271	0
270	0
269	0
268	0
267	0
266	0
265	0
264	0
263	0
262	0
261	0
260	0
259	0
258	0
257	0
256	0
255	0
254	0
253	0
252	0
251	0
250	0
249	0
248	0
247	0
246	0
245	0
244	0
243	0
242	0
241	0
240	0
239	0
238	0
237	0
236	0
235	0
234	0
233	0
232	0
231	0
230	0
229	0
228	0
227	0
226	0
225	0
224	0
223	0
222	0
221	0
220	0
219	0
218	0
217	0
216	0
215	0
214	0
213	0
212	0
211	0
210	0
209	0
208	0
207	0
206	0
205	0
204	0
203	0
202	0
201	0
200	0
