# Supplementary figures and images for: Effect of the lignin type on the gas/UV barrier properties of lignin–polyethyleneimine based composite films
Source: Royal Society of Chemistry journal article supplement (doi:10.1039/d5ra07628e), 2026-01-01

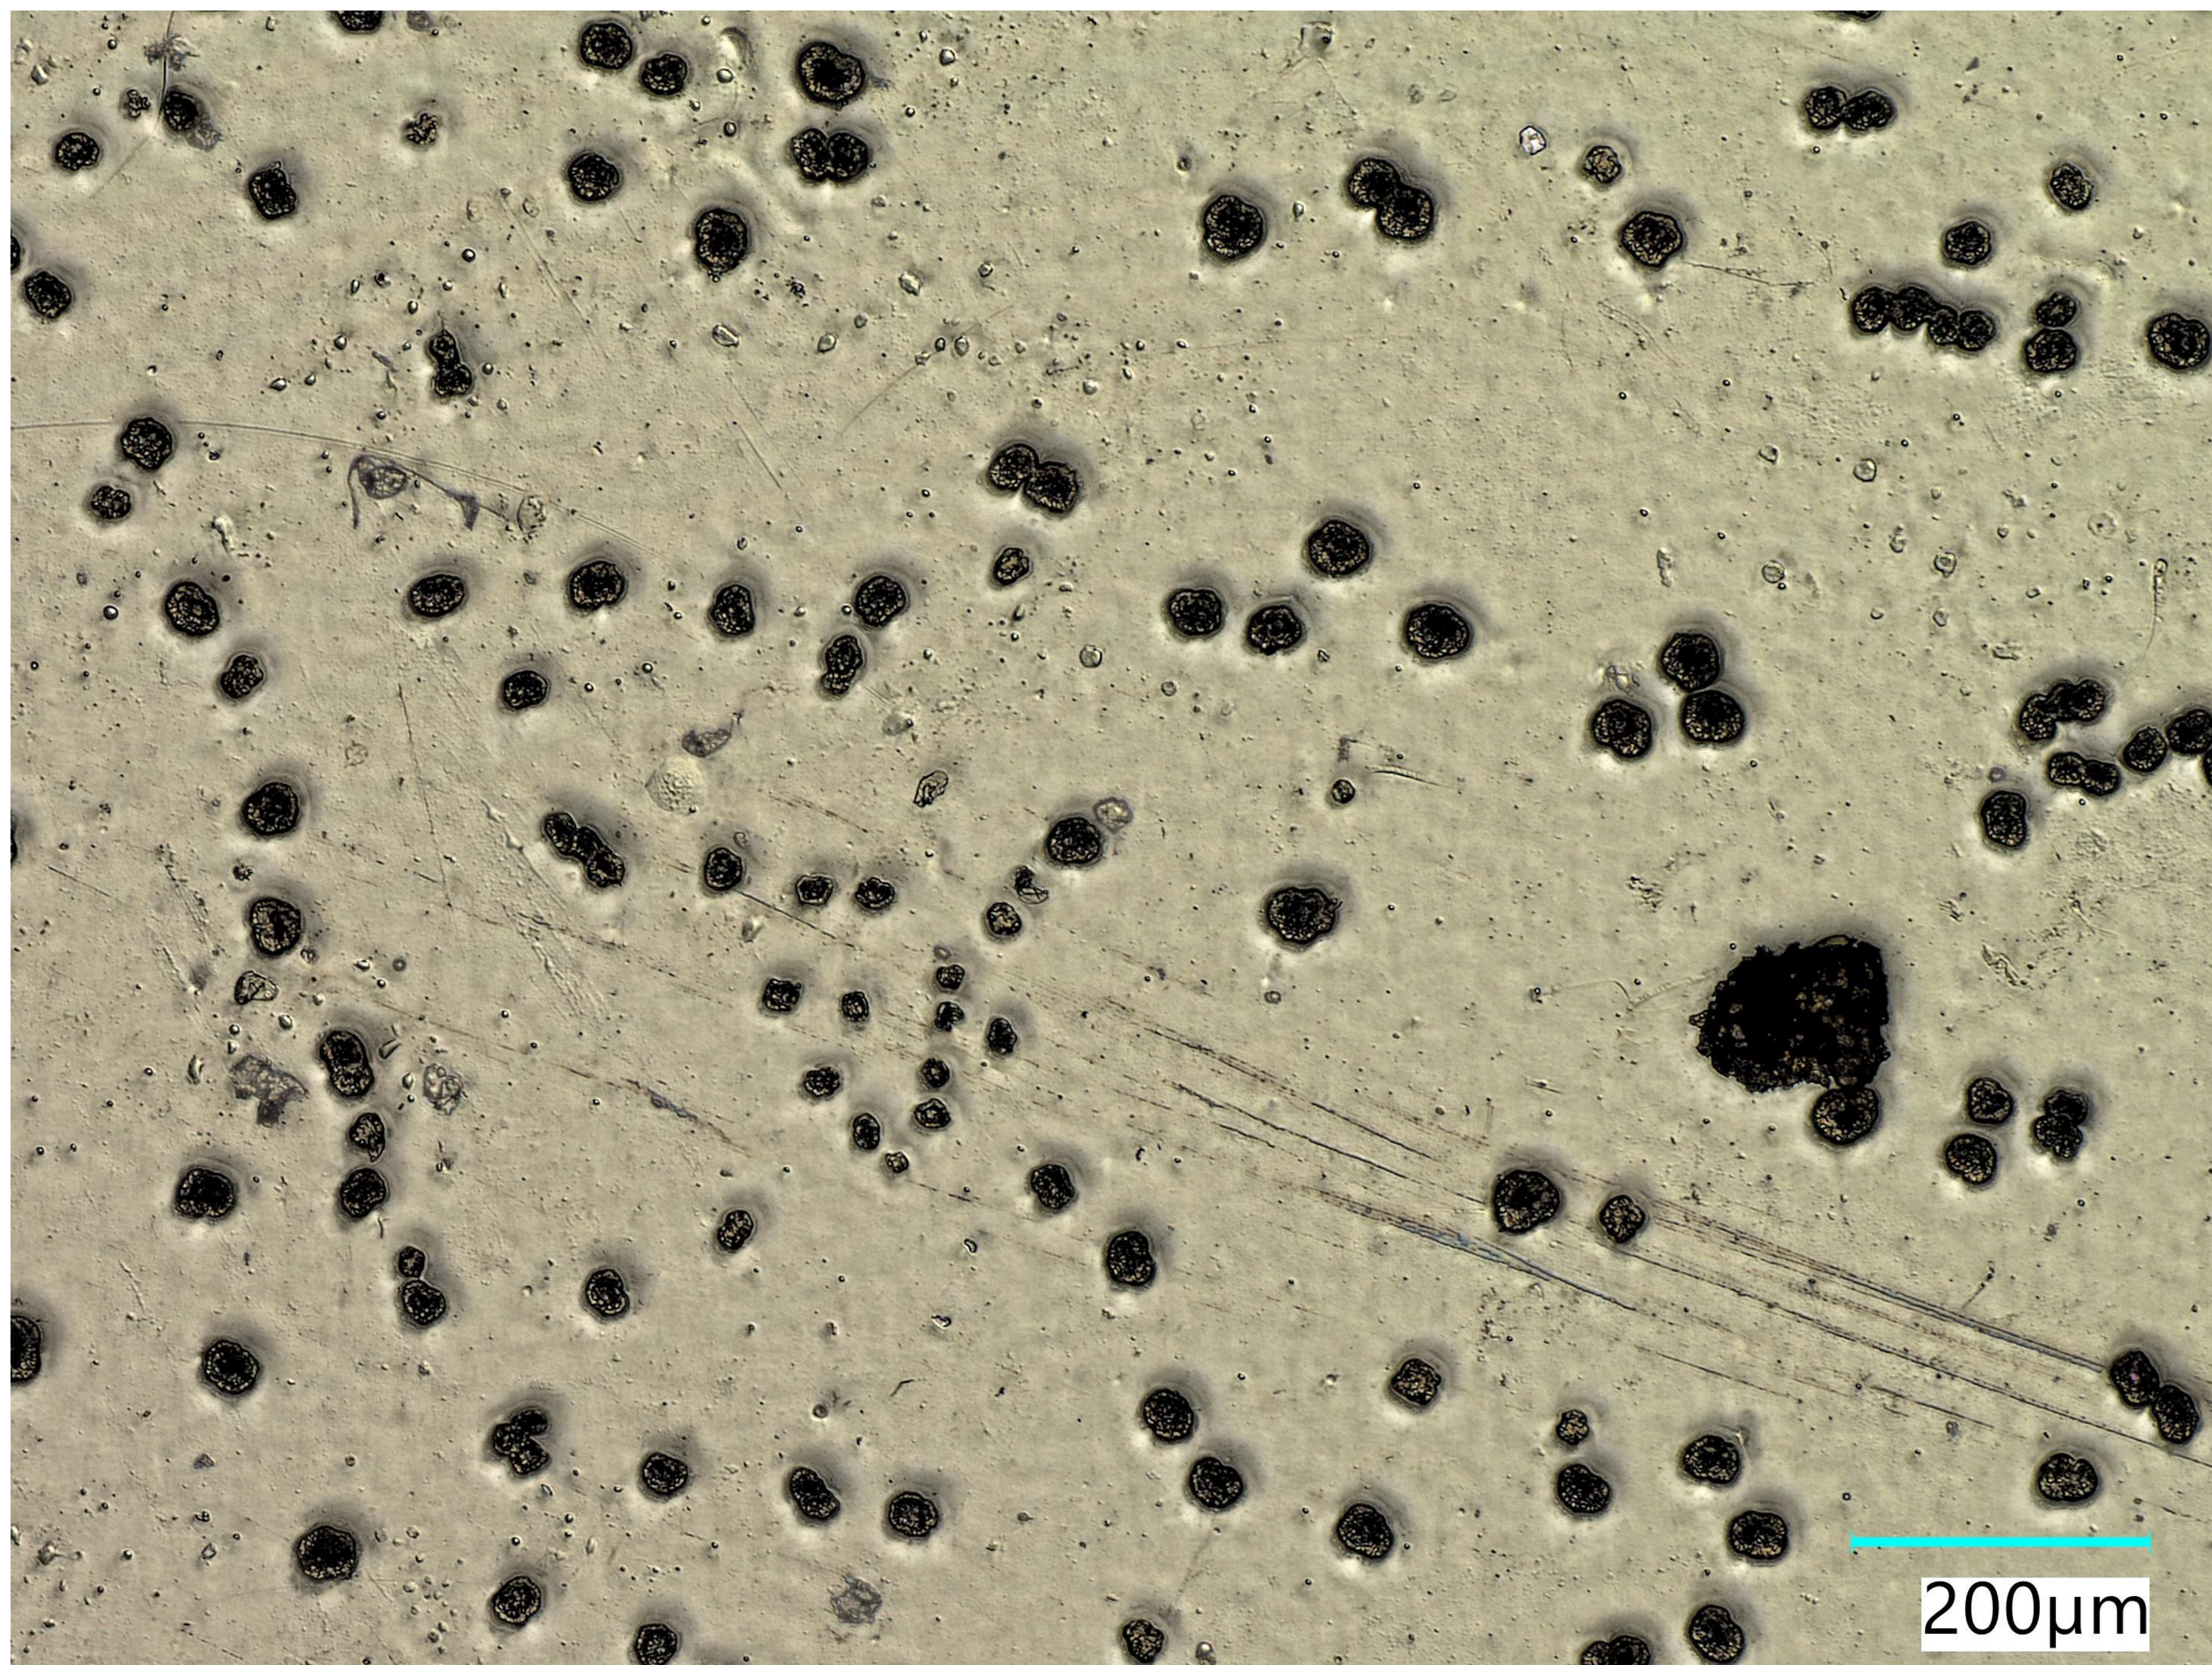

Supplement: d5ra07628e20.pdf [file d5ra07628e20.pdf]
